# Supplementary material for: The third orthogonal dynamic covalent bond
Source: PubMed Central journal article supplement (PMC6014071; doi:10.1039/c6sc01133k), 2016-04-20
Supplement: SC-007-C6SC01133K-s001.pdf [file SC-007-C6SC01133K-s001.pdf]

## The third orthogonal dynamic covalent bond

Santiago Lascano, Kang-Da Zhang, Robin Wehlauch, Karl Gademann, Naomi Sakai,

Stefan Matile\*

*National Centre of Competence in Research (NCCR) Molecular Systems Engineering*

*Department of Organic Chemistry, University of Geneva, Geneva, Switzerland*

*Department of Chemistry, University of Zurich, Zurich, Switzerland*

stefan.matile@unige.ch

### Supporting Information

#### Table of Content

|                                                  |     |
|--------------------------------------------------|-----|
| 1. Materials and methods                         | S2  |
| 2. Synthesis                                     | S3  |
| 3. Formation of boronate esters in solution      | S12 |
| 3.1. Direct titration                            | S12 |
| 3.2. Reverse titration                           | S13 |
| 4. Orthogonal dynamic covalent bonds in solution | S16 |
| 4.1. Boronate ester exchange in solution         | S17 |
| 4.2. Hydrazone exchange in solution              | S23 |
| 4.3. Disulfide exchange in solution              | S28 |
| 4.4. Control experiments in solution             | S33 |
| 5. Orthogonal dynamic covalent bonds on surfaces | S36 |
| 6. Supporting references                         | S40 |
| 7. NMR spectra                                   | S41 |

## 1. Materials and methods

As in reference S1. Briefly, reagents for synthesis were purchased from Fluka, Sigma-Aldrich, Apollo Scientific, Alfa Aesar, Fluorochem and Acros, buffers and salts of the best grade available from Fluka or Sigma-Aldrich and used as received. Unless stated otherwise, column chromatography was carried out on silica gel 60 (Silicycle, 40-63  $\mu\text{m}$ ). Analytical TLC was performed on silica gel 60 (Fluka, 0.2 mm or Merck, 0.25 mm). Preparative, reversed-phase HPLC was performed with a Varian 218 pump, a Dionex VWD-3400 detector and a Dionex AFC-3000 fraction collector on a Phenomenex Gemini-NX 10 $\mu$  C18 110A (250 x 21.2 mm) column eluting with a constant gradient of MeCN in H<sub>2</sub>O from 5–100% over 30 min at a flow rate of 20 mL min<sup>-1</sup>. Analytical, reversed-phase UPLC was performed with an Agilent 1290 Infinity LC system on a Zorbax SB-C18 (1.8  $\mu\text{m}$ , 50 x 2.1 mm) column eluting with a linear gradient of MeCN in H<sub>2</sub>O containing 0.1% formic acid at a flow rate of 0.8 mL min<sup>-1</sup>. UV-Vis spectra were recorded on a JASCO V-650 spectrophotometer equipped with a stirrer and a temperature controller and are reported as maximal absorption wavelength  $\lambda$  in nm. Melting points (Mp) were recorded on a Büchi Melting Point M-565 or B-545.  $[\alpha]_D^{20}$  values were recorded on a Jasco P-1030 Polarimeter. IR spectra were recorded on a Perkin Elmer Spectrum One FT-IR spectrometer (ATR, Golden Gate) or a Varian 800 FT-IR (ATR) spectrometer and are reported as wavenumbers  $\nu$  in cm<sup>-1</sup> with band intensities indicated as s (strong), m (medium), w (weak) or br (broad). <sup>1</sup>H and <sup>13</sup>C NMR spectra were recorded (as indicated) either on a Bruker 300 MHz or 400 MHz spectrometer and are reported as chemical shifts ( $\delta$ ) in ppm relative to (residual) solvent signal. Spin multiplicities are reported as a singlet (s), doublet (d), triplet (t), quartet (q), doublet of doublets (dd), doublet of quartets (dq) with coupling constants ( $J$ ) given in Hz, or multiplet (m). <sup>13</sup>C resonances were assigned with the aid of additional information from DEPT 135 spectra. ESI-MS for the characterization of new compounds was performed on an ESI API 150EX and are reported as mass-per-charge ratio  $m/z$  (intensity in %, [assignment]). HR ESI-MS for the characterization of new

compounds were performed on a QSTAR Pulsar (AB/MDS Sciex) or a Bruker maXis 4G QTOF and are reported as mass per charge ratio  $m/z$  calculated and observed.

**Abbreviations.** AcNHNH<sub>2</sub>: Acetylhydrazide; Boc: *tert*-Butyloxycarbonyl; Calcd: Calculated; DIPEA: *N,N*-Diisopropylethylamine; DMF: *N,N*-Dimethylformamide; DMSO: Dimethylsulfoxide; EDCI: 1-Ethyl-3-(3-dimethylaminopropyl)carbodiimide; HOBt: Hydroxybenzotriazole; ITO: Indium tin oxide; NMP: *N*-methyl-2-pyrrolidone; PE: Petroleum ether; PTLC: Preparative thin layer chromatography; rt: Room temperature; TEA: Triethylamine; TES: Tetraethylsilane; TFA: Trifluoroacetic acid; TMS-CF<sub>3</sub>: Trifluoromethyltrimethylsilane.

## 2. Synthesis

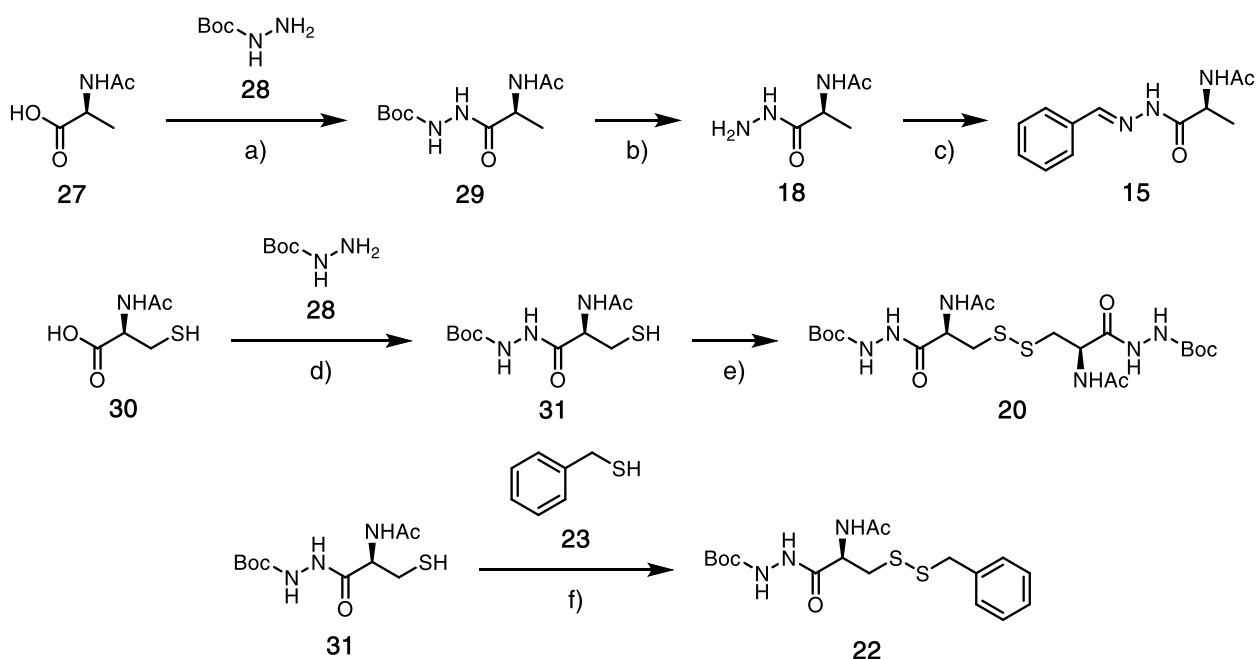

**Scheme S1.** a) HOBt, EDCI, CH<sub>2</sub>Cl<sub>2</sub>, DMF, rt, 20 h, 66%; b) TFA, CH<sub>2</sub>Cl<sub>2</sub>, rt, 1 h, 95%; c) benzaldehyde, thioanisole, CH<sub>2</sub>Cl<sub>2</sub>, rt, 1 h, quantitative; d) HOBt, EDCI, CH<sub>2</sub>Cl<sub>2</sub>, DMF, rt, 20 h, 70%; e) H<sub>2</sub>O<sub>2</sub>, NaI, EtOAc, rt, 3 h, 83%; f) H<sub>2</sub>O<sub>2</sub>, NaI, EtOAc, rt, 1 h, 60%.

**Compound 29.** To a solution of *N*-acetyl-L-alanine **27** (195 mg, 1.49 mmol) and **28** (340 mg, 2.57 mmol) in a mixture of distilled DMF (1.5 mL) and CH<sub>2</sub>Cl<sub>2</sub> (12.5 mL) were added HOBt·H<sub>2</sub>O (370 mg, 2.08 mmol) and EDCI (324 mg, 1.69 mmol) and the mixture was left under stirring at rt

for 20 h. The solvents were evaporated *in vacuo* and the crude subjected to flash column chromatography (SiO<sub>2</sub>, CH<sub>2</sub>Cl<sub>2</sub>/MeOH/acetone 42:6:2). Further purification by flash column chromatography (SiO<sub>2</sub>, EtOAc/MeOH 9:1) afforded compound **29** as a colorless solid (239 mg, 66%). *R<sub>f</sub>* (CH<sub>2</sub>Cl<sub>2</sub>/MeOH 9:1): 0.41; Mp: 173-174 °C; [ $\alpha$ ]<sup>20</sup><sub>D</sub>: -70 (*c* 0.84, CH<sub>2</sub>Cl<sub>2</sub>/MeOH 4:1); IR (neat): 3265 (w), 2980 (w), 1651 (m), 1531 (m), 1368 (m), 1241 (m), 1158 (s), 1013 (w); <sup>1</sup>H NMR (400 MHz, DMSO-*d*<sub>6</sub>): 9.61 (s, 1H), 8.72 (s, 1H), 8.05 (d, <sup>3</sup>*J* (H,H) = 7.9 Hz, 1H), 4.31 (dq, <sup>3</sup>*J* (H,H) = 7.9 Hz, <sup>3</sup>*J* (H,H) = 7.1 Hz, 1H), 1.82 (s, 3H), 1.38 (s, 9H), 1.19 (d, <sup>3</sup>*J* (H,H) = 7.1 Hz, 3H); <sup>13</sup>C NMR (101 MHz, DMSO-*d*<sub>6</sub>): 172.1 (C), 168.9 (C), 155.1 (C), 79.1 (C), 46.4 (CH), 28.1 (CH<sub>3</sub>), 22.5 (CH<sub>3</sub>), 18.5 (CH<sub>3</sub>); ESI-MS (CHCl<sub>3</sub>/MeOH 1:1, HCO<sub>2</sub>H 0.1%): 999 (12, [4M+NH<sub>4</sub>]<sup>+</sup>), 754 (44, [3M+NH<sub>4</sub>]<sup>+</sup>), 509 (100, [2M+NH<sub>4</sub>]<sup>+</sup>), 492 (40, [2M+H]<sup>+</sup>), 264 (69, [M+NH<sub>4</sub>]<sup>+</sup>), 247 (46, [M+H]<sup>+</sup>), 114 (67, [M-NHNHBoc+H]<sup>+</sup>); HRMS (ESI, CHCl<sub>3</sub>/MeOH 1:1, HCO<sub>2</sub>H 0.1%) calcd for C<sub>10</sub>H<sub>19</sub>N<sub>3</sub>O<sub>4</sub>+Na: 268.1268, found: 268.1267.

**Compound 18.** To a solution of **29** (17 mg, 68 μmol) in CH<sub>2</sub>Cl<sub>2</sub> (5 mL) was added TFA (1.0 mL), and the mixture was left under stirring at rt for 1 h. The solvents were then evaporated *in vacuo* and the residue dissolved in Et<sub>2</sub>O. Evaporation *in vacuo* of the solvent afforded compound **18** as a colorless oil (9 mg, 95%). *R<sub>f</sub>* (CH<sub>2</sub>Cl<sub>2</sub>/MeOH 9:1): 0.13; [ $\alpha$ ]<sup>20</sup><sub>D</sub>: -31 (*c* 0.59, MeOH); IR (neat): 3262 (w) 1645 (s), 1535 (s), 1451 (w), 1432 (w), 1376 (m), 1294 (w), 1200 (s), 1179 (s), 1133 (s), 1049 (w), 1026 (m), 999 (m), 833 (w), 800 (m); <sup>1</sup>H NMR (400 MHz, DMSO-*d*<sub>6</sub>): 10.73 (br, 1H), 8.26 (d, <sup>3</sup>*J* (H,H) = 7.0 Hz, 1H), 4.27 (dq, <sup>3</sup>*J* (H,H) = 7.0 Hz, <sup>3</sup>*J* (H,H) = 7.0 Hz, 1H), 1.84 (s, 3H), 1.23 (d, <sup>3</sup>*J* (H,H) = 7.0 Hz, 3H); <sup>13</sup>C NMR (101 MHz, DMSO-*d*<sub>6</sub>): 172.1 (C), 169.3 (C), 46.9 (CH), 22.3 (CH<sub>3</sub>), 17.6 (CH<sub>3</sub>); ESI-MS (CHCl<sub>3</sub>/MeOH 1:1, HCO<sub>2</sub>H 0.1%): 314 (35, [2M+Na]<sup>+</sup>), 292 (63, [2M+H]<sup>+</sup>), 169 (37, [M+Na]<sup>+</sup>), 146 (100, [M+H]<sup>+</sup>), 114 (52, [M-NH<sub>2</sub>NH+H]<sup>+</sup>); HRMS (ESI, CHCl<sub>3</sub>/MeOH 1:1, HCO<sub>2</sub>H 0.1%) calcd for C<sub>5</sub>H<sub>11</sub>N<sub>3</sub>O<sub>2</sub>: 168.0744, found: 168.0744.

**Compound 15.** To a solution of **29** (156 mg, 0.64 mmol) in a mixture of CH<sub>2</sub>Cl<sub>2</sub> (10 mL) and thioanisole (1.2 mL) was added TFA (5.0 mL) and the mixture was left under stirring at rt for 1 h.

After addition of benzaldehyde (5.0 mL, 92 mmol), the mixture was left under stirring at rt for 1 h. The mixture was subjected to liquid-liquid extraction with sat. aq. NaHCO<sub>3</sub> and EtOAc. The organic phase was dried over Na<sub>2</sub>SO<sub>4</sub>, filtered and concentrated. Purification of the remaining oil by flash column chromatography (SiO<sub>2</sub>, CH<sub>2</sub>Cl<sub>2</sub>/MeOH 9:1) afforded compound **15** as a colorless solid (151 mg, quantitative). *R*<sub>f</sub> (CH<sub>2</sub>Cl<sub>2</sub>/MeOH 9:1): 0.50; [α]<sup>20</sup><sub>D</sub>: +29 (*c* 0.96, MeOH); Mp: decomp. > 170 °C; IR (neat): 3274 (w), 3210 (w), 3067 (w), 1667 (s), 1633 (s), 1549 (s), 1444 (w), 1371 (m), 1323 (w), 1281 (w), 1230 (m), 1209 (w), 1146 (m), 1107 (w), 1058 (w), 949 (m), 754 (s), 693 (s), 604 (s), 562 (w); <sup>1</sup>H NMR (400 MHz, CD<sub>3</sub>OD, *n/n*: stereoisomeric peaks): 8.15 / 7.95 (s, 1H), 7.78 - 7.72 / 7.70 - 7.65 (m, 2H), 7.44 - 7.35 (m, 3H), 5.32 / 4.43 (q, <sup>3</sup>*J* (H,H) = 7.2 Hz, 1H), 2.00 (s, 3H), 1.43 / 1.42 (d, <sup>3</sup>*J* (H,H) = 7.2 Hz, 3H); <sup>13</sup>C NMR (101 MHz, CD<sub>3</sub>OD, *n/n*: stereoisomeric peaks): 176.1 / 172.0 (C), 173.2 / 172.9 (C), 150.3 / 146.3 (CH), 135.5 / 135.3 (C), 131.6 / 131.2 (CH), 129.81 / 129.77 (CH), 128.7 / 128.2 (CH), 49.5 / 47.5 (CH), 22.43 / 22.38 (CH<sub>3</sub>), 18.0 / 17.6 (CH<sub>3</sub>); ESI-MS (CHCl<sub>3</sub>/MeOH 1:1, HCO<sub>2</sub>H 0.1%): 490 (22, [2M+Na]<sup>+</sup>), 468 (50, [2M+H]<sup>+</sup>), 256 (33, [M+Na]<sup>+</sup>), 234 (100, [M+H]<sup>+</sup>); HRMS (ESI, CHCl<sub>3</sub>/MeOH 1:1, HCO<sub>2</sub>H 0.1%) calcd for C<sub>12</sub>H<sub>15</sub>N<sub>3</sub>O<sub>2</sub>: 234.1237, found: 234.1239.

**Compound 31.** To a solution of *N*-acetyl-L-cysteine **30** (1.00 g, 6.13 mmol) and **28** (1.34 g, 10.1 mmol) in a mixture of distilled DMF (6 mL) and CH<sub>2</sub>Cl<sub>2</sub> (50 mL) were added HOBt·H<sub>2</sub>O (1.46 g, 8.22 mmol) and EDCI (1.30 g, 6.79 mmol) and the mixture was left under stirring at rt for 20 h. The solvents were evaporated *in vacuo* and the crude subjected to flash column chromatography (SiO<sub>2</sub>, CH<sub>2</sub>Cl<sub>2</sub>/MeOH 9:1). Further purification by flash column chromatography (SiO<sub>2</sub>, EtOAc) afforded compound **31** as a colorless oil (1.20 g, 70%). *R*<sub>f</sub> (CH<sub>2</sub>Cl<sub>2</sub>/MeOH 9:1): 0.47; [α]<sup>20</sup><sub>D</sub>: -45 (*c* 0.92, MeOH); IR (neat): 3271 (m), 2978 (w), 1656 (s), 1530 (m), 1369 (m), 1243 (m), 1161 (s), 1045 (w), 1014 (w); <sup>1</sup>H NMR (400 MHz, CDCl<sub>3</sub>): 8.91 (s, 1H), 7.02 - 6.86 (m, 2H), 4.70 - 4.76 (m, 1H), 3.01 - 2.70 (m, 2H), 2.05 (s, 3H), 1.83 - 1.89 (m, 1H), 1.45 (s, 9H); <sup>13</sup>C NMR (101 MHz, CDCl<sub>3</sub>): 171.1 (C), 170.1 (C), 155.4 (C), 82.1 (C), 53.2 (CH), 28.3 (CH<sub>3</sub>), 26.8

(CH<sub>2</sub>), 23.2 (CH<sub>3</sub>); ESI-MS (CHCl<sub>3</sub>/MeOH 1:1, HCO<sub>2</sub>H 0.1%): 1127 (5, [4M+NH<sub>4</sub>]<sup>+</sup>), 850 (28, [3M+NH<sub>4</sub>]<sup>+</sup>), 573 (85, [2M+NH<sub>4</sub>]<sup>+</sup>), 556 (20, [2M+H]<sup>+</sup>), 296 (100, [M+NH<sub>4</sub>]<sup>+</sup>), 279 (36, [M+H]<sup>+</sup>), 147 (90, [M-NHNHBoc+H]<sup>+</sup>); HRMS (ESI, CHCl<sub>3</sub>/MeOH 1:1, HCO<sub>2</sub>H 0.1%) calcd for C<sub>10</sub>H<sub>19</sub>N<sub>3</sub>O<sub>4</sub>S+Na: 300.0989, found: 300.0986.

**Compound 20.** To a solution of **31** (598 mg, 2.16 mmol) in EtOAc (30 mL) were added NaI (10 mg, 70 μmol) and H<sub>2</sub>O<sub>2</sub> (30% solution, 0.22 mL, 2.2 mmol) and the mixture was left under stirring at rt for 3 h, after which more H<sub>2</sub>O<sub>2</sub> (30% solution, 0.22 mL, 2.2 mmol) was added. After 5 minutes stirring at rt, the solution was subjected to liquid-liquid extraction with sat. aq. Na<sub>2</sub>S<sub>2</sub>O<sub>3</sub>, EtOAc, and then CH<sub>2</sub>Cl<sub>2</sub>/MeOH 9:1. The organic phases were dried over Na<sub>2</sub>SO<sub>4</sub>, filtered and concentrated. The resulting solid was subjected to solid-liquid extraction with Et<sub>2</sub>O, affording compound **20** as a colorless solid (496 mg, 83%). *R<sub>f</sub>* (CH<sub>2</sub>Cl<sub>2</sub>/MeOH 9:1): 0.41; Mp: decomp. > 158 °C; [α]<sub>D</sub><sup>20</sup>: -101 (c 0.98, MeOH); IR (neat): 3280 (w), 1715 (m), 1661 (s), 1555 (m), 1368 (s), 1297 (w), 1258 (w), 1161 (m), 1048 (w), 1022 (w), 773 (w), 713 (m), 620 (m), 588 (s); <sup>1</sup>H NMR (400 MHz, CD<sub>3</sub>OD): 4.79 (dd, <sup>3</sup>*J* (H,H) = 9.3 Hz, <sup>3</sup>*J* (H,H) = 5.1 Hz, 2H), 3.27 - 2.87 (m, 4H), 2.00 (s, 6H), 1.47 (s, 18H); <sup>13</sup>C NMR (101 MHz, CD<sub>3</sub>OD): 173.4 (C), 172.3 (C), 157.5 (C), 82.0 (C), 52.3 (CH), 41.4 (CH<sub>2</sub>), 28.5 (CH<sub>3</sub>), 22.5 (CH<sub>3</sub>); ESI-MS (CHCl<sub>3</sub>/MeOH 1:1, HCO<sub>2</sub>H 0.1%): 1123 (28, [2M+NH<sub>4</sub>]<sup>+</sup>), 1106 (18, [2M+H]<sup>+</sup>), 576 (41, [M+Na]<sup>+</sup>), 571 (97, [M+NH<sub>4</sub>]<sup>+</sup>), 553 (100, [M+H]<sup>+</sup>); HRMS (ESI, CHCl<sub>3</sub>/MeOH 1:1, HCO<sub>2</sub>H 0.1%) calcd for C<sub>20</sub>H<sub>36</sub>N<sub>6</sub>O<sub>8</sub>S<sub>2</sub>: 553.2109, found: 553.2111.

**Compound 22.** To a solution of **31** (6 mg, 20 μmol) and benzylthiol **23** (25.0 μL, 216 μmol) in EtOAc (2 mL) were added NaI (3 mg, 20 μmol) and H<sub>2</sub>O<sub>2</sub> (30% solution, 50 μL, 490 mmol) and the mixture was left under stirring at rt for 1 h. The solution was then subjected to liquid-liquid extraction with sat. aq. Na<sub>2</sub>S<sub>2</sub>O<sub>3</sub> and CH<sub>2</sub>Cl<sub>2</sub>. The organic phases were dried over Na<sub>2</sub>SO<sub>4</sub>, filtered and concentrated. The resulting solid was purified by PTLC (CH<sub>2</sub>Cl<sub>2</sub>/MeOH/acetone 44:3:3), affording compound **22** as a colorless oil (5 mg, 60%). *R<sub>f</sub>* (CH<sub>2</sub>Cl<sub>2</sub>/MeOH 9:1): 0.31; [α]<sub>D</sub><sup>20</sup>: -25 (c

0.18, CH<sub>2</sub>Cl<sub>2</sub>); IR (neat): 3283 (m), 1655 (s), 1530 (m), 1493 (m), 1371 (s), 1244 (s), 1159 (s), 911 (w), 766 (w), 728 (s), 699 (s); <sup>1</sup>H NMR (400 MHz, CDCl<sub>3</sub>): 8.10 (s, 1H), 7.37 – 7.27 (m, 5H), 6.41 (s, 1H), 6.22 (d, <sup>3</sup>J (H,H) = 7.1 Hz, 1H), 4.65 (q, <sup>3</sup>J (H,H) = 7.1 Hz, 1H), 3.90 – 3.97 (m, 2H), 2.75 (d, <sup>3</sup>J (H,H) = 7.1 Hz, 2H), 2.03 (s, 3H), 1.46 (s, 9H); <sup>13</sup>C NMR (101 MHz, CDCl<sub>3</sub>): 170.9 (C), 169.9 (C), 154.9 (C), 137.0 (C), 129.6 (CH), 128.8 (CH), 127.8 (CH), 82.1 (C), 51.0 (CH), 43.4 (CH<sub>2</sub>), 38.7 (CH<sub>2</sub>), 28.3 (CH<sub>3</sub>), 23.3 (CH<sub>3</sub>); ESI-MS (CHCl<sub>3</sub>/MeOH 1:1, HCO<sub>2</sub>H 0.1%): 417 (51, [M+NH<sub>4</sub>]<sup>+</sup>), 400 (83, [M+H]<sup>+</sup>), 267 (100, [M-NHNHBoc+H]<sup>+</sup>); HRMS (ESI, CHCl<sub>3</sub>/MeOH 1:1, HCO<sub>2</sub>H 0.1%) calcd for C<sub>17</sub>H<sub>25</sub>N<sub>3</sub>O<sub>4</sub>S<sub>2</sub>: 400.1359, found: 400.1361.

**Compounds 10 and 10\*** were synthesized according to the procedure reported in ref. S1.

**Compound 19** was synthesized according to the procedure reported in ref. S2.

**Compound 17** was synthesized according to the procedure reported in ref. S3.

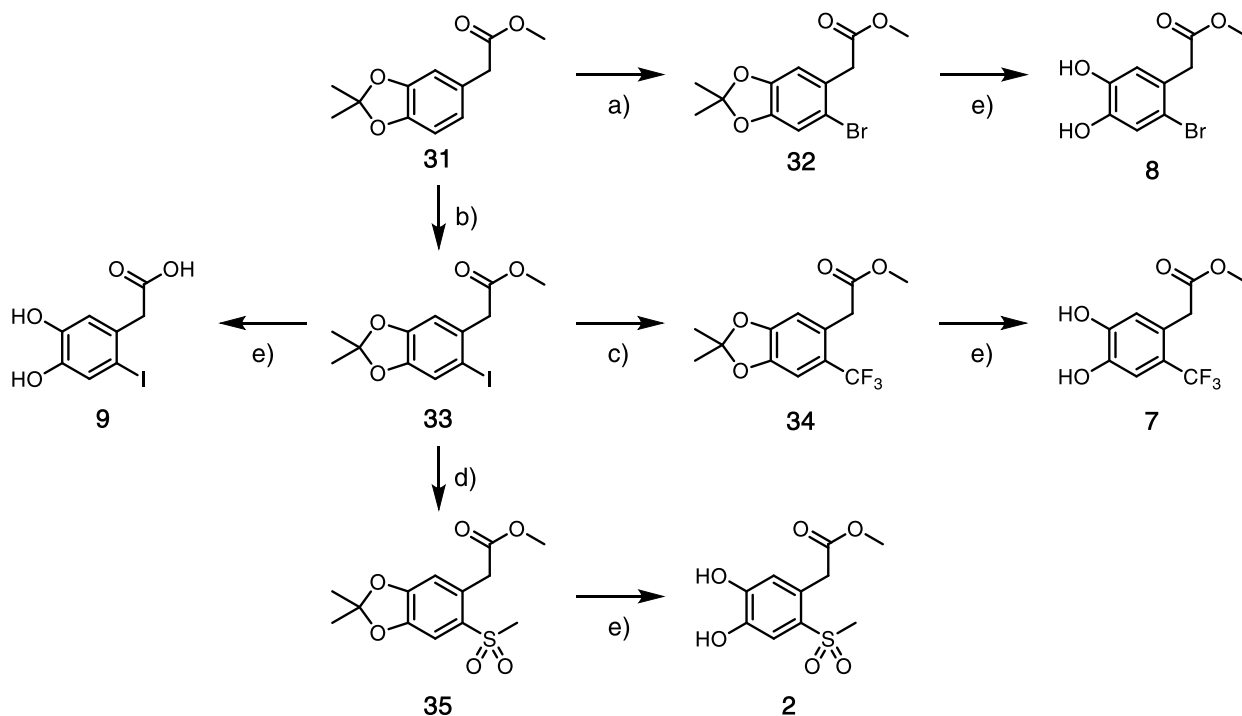

**Scheme S2.** a) KBr, oxone, acetone, H<sub>2</sub>O, rt, 1 h, quantitative; b) I<sub>2</sub>, Ag<sub>2</sub>SO<sub>4</sub>, MeOH, rt, 1 h, 99%; c) TMS-CF<sub>3</sub>, KF, CuI, NMP, 80 °C (sealed), 22 h, 88%; d) CH<sub>3</sub>SO<sub>2</sub>Na, L-proline, Cu(OAc)<sub>2</sub>, DMSO, 100 °C (sealed), 24 h, 77%; e) TFA, H<sub>2</sub>O, 0 °C to rt, 2.5 h, 45–78%.

**Compound 32.** To a solution of **31** (300 mg, 1.35 mmol) in acetone (14 mL) and water (8.0 mL) was added oxone (873 mg, 1.42 mmol) and KBr (193 mg, 1.62 mmol) and the mixture was stirred at rt for 1 h. The mixture was filtered and acetone was removed under reduced pressure. Sat. aq. Na<sub>2</sub>S<sub>2</sub>O<sub>3</sub> was added and the mixture extracted with CH<sub>2</sub>Cl<sub>2</sub>. The combined organic layers were dried over Na<sub>2</sub>SO<sub>4</sub> and evaporated to give compound **32** (409 mg, quant.) as a yellow oil. *R<sub>f</sub>* (pentane/Et<sub>2</sub>O, 10:1): 0.43; Mp: 49-50 °C; IR (neat): 2991 (w), 2952 (w), 1738 (s), 1489 (s), 1380 (m), 1215 (s), 1149 (s), 980 (s), 855 (s), 783 (m); <sup>1</sup>H NMR (400 MHz, CDCl<sub>3</sub>): 6.92 (s, 1H), 6.67 (s, 1H), 3.72 (s, 3H), 3.68 (s, 2H), 1.66 (s, 6H); <sup>13</sup>C NMR (101 MHz, CDCl<sub>3</sub>): 171.4, 147.7, 147.4, 126.3, 119.5, 114.8, 112.6, 110.9, 52.3, 41.4, 26.0; HRMS (ESI, MeOH) calcd for C<sub>12</sub>H<sub>13</sub>BrO<sub>4</sub>+Na: 322.9889, found: 322.9888.

**Compound 8.** Compound **32** (161 mg, 535 μmol) was cooled to 0 °C and precooled 20% aq. TFA (1 mL) was added. After 5 minutes, the ice bath was removed and stirring continued at room



temperature for 2.5 h. Volatiles were removed under reduced pressure and the residue was purified by preparative reversed-phase HPLC to yield **8** (102 mg, 73%) as an off-white solid. Mp: 106-108 °C; IR (neat): 3370 (br, m), 2955 (w), 2364 (w), 1712 (s), 1510 (s), 1436 (m), 1339 (m), 1282 (s), 1221 (s), 1162 (s), 1011 (m), 870 (m), 821 (m); <sup>1</sup>H NMR (400 MHz, CD<sub>3</sub>OD): 6.94 (s, 1H), 6.75 (s, 1H), 3.68 (s, 3H), 3.63 (s, 2H); <sup>13</sup>C NMR (101 MHz, CD<sub>3</sub>OD): 173.5, 146.8, 146.1, 126.2, 119.9, 119.1, 114.0, 52.4, 41.4; HRMS (ESI, MeOH): calcd for C<sub>9</sub>H<sub>9</sub>BrO<sub>4</sub>+Na: 282.9576, found: 282.9576.

**Compound 33.** To a solution of **31** (302 mg, 1.36 mmol) in MeOH (8.0 mL) was added Ag<sub>2</sub>SO<sub>4</sub> (636 mg, 2.04 mmol) and iodine (517 mg, 2.04 mmol) and the brown mixture was stirred at rt for 1 h during which the brown color faded. The mixture was filtered, diluted with water and extracted with Et<sub>2</sub>O. The combined organic layers were dried over Na<sub>2</sub>SO<sub>4</sub> and evaporated. The residue was eluted through a short silica column (pentane/Et<sub>2</sub>O, 5:1, 1% Et<sub>3</sub>N) to yield compound **33** (468 mg, 99%) as an orange oil that solidified overnight at 4 °C. *R*<sub>f</sub> (pentane/Et<sub>2</sub>O, 5:1): 0.55; Mp: 68-69 °C; IR (neat): 2988 (w), 2956 (w), 1728 (s), 1489 (s), 1458 (m), 1380 (m), 1335 (m), 1224 (s), 1189 (s), 1151 (s), 981 (s), 836 (s); <sup>1</sup>H NMR (400 MHz, CDCl<sub>3</sub>): 7.15 (s, 1H), 6.71 (s, 1H), 3.72 (s, 4H), 3.70 (s, 2H), 1.66 (s, 7H); <sup>13</sup>C NMR (101 MHz, CDCl<sub>3</sub>): 171.4, 148.4, 147.7, 130.1, 119.4, 118.5, 110.4, 88.2, 52.3, 46.0, 26.0; HRMS (ESI, MeOH): calcd for C<sub>12</sub>H<sub>13</sub>IO<sub>4</sub>+Na: 370.9751, found: 370.9750.

**Compound 9.** Deprotection of **33** (120 mg, 345 μmol) was performed analogously to **8** yielding **9** (66 mg, 62%) as an off-white solid. Mp: 112-114 °C; IR (neat): 3385 (br, m), 2952 (w), 2360 (w), 2338 (w), 1711 (s), 1504 (s), 1437 (m), 1335 (m), 1279 (s), 1224 (s), 1162 (s); <sup>1</sup>H NMR (400 MHz, CD<sub>3</sub>OD): 7.18 (s, 1H), 6.76 (s, 1H), 3.68 (s, 3H), 3.64 (s, 2H); <sup>13</sup>C NMR (101 MHz, CD<sub>3</sub>OD): 173.5, 147.1, 146.7, 130.1, 126.3, 118.6, 87.5, 52.5, 45.9; HRMS (ESI, MeOH): calcd for C<sub>9</sub>H<sub>9</sub>IO<sub>4</sub>+Na: 330.9438, found: 330.9438.

**Compound 34.** A mixture of **33** (468 mg, 1.34 mmol), KF (156 mg, 2.69 mmol; predried at 100 °C under high vacuum) and CuI (538 mg, 2.82 mmol) was suspended in NMP (3.7 mL). TMS-CF<sub>3</sub> (0.40 mL, 2.69 mmol) was added and the mixture was heated to 80 °C for 22 h in a sealed tube. The mixture was poured into dilute aq. NaCl and extracted with CH<sub>2</sub>Cl<sub>2</sub>. The combined organic layers were subjected to liquid-liquid extraction with water, dried over Na<sub>2</sub>SO<sub>4</sub> and the solvent evaporated. The residue was subjected to flash column chromatography (pentane/Et<sub>2</sub>O, 5:1, 1% Et<sub>3</sub>N) to yield **34** (341 mg, 88%) as a yellow oil. *R*<sub>f</sub> (pentane/Et<sub>2</sub>O, 5:1): 0.66; IR (neat): 2995 (w), 2956 (w), 1743 (m), 1504 (m), 1386 (m), 1295 (m), 1218 (m), 1144 (s), 1109 (s), 979 (m), 870 (m); <sup>1</sup>H NMR (400 MHz, CDCl<sub>3</sub>): 6.99 (s, 1H), 6.72 (s, 1H), 3.71 (s, 5H), 1.69 (s, 6H); <sup>13</sup>C NMR (101 MHz, CDCl<sub>3</sub>): 171.4, 149.9, 146.6, 126.6 (q, <sup>3</sup>*J* (C,F) = 2.1 Hz), 124.2 (q, <sup>1</sup>*J* (C,F) = 273.2 Hz), 121.8 (q, <sup>2</sup>*J* (C,F) = 30.7 Hz), 119.8, 112.1, 106.2 (q, <sup>3</sup>*J* (C,F) = 6.0 Hz), 52.2, 37.7 (q, <sup>4</sup>*J* (C,F) = 1.8 Hz), 25.9; HRMS (ESI, MeOH): calcd for C<sub>13</sub>H<sub>13</sub>F<sub>3</sub>O<sub>4</sub>+Na: 313.0658, found: 313.0658.

**Compound 7.** Deprotection of **34** (200 mg, 689 μmol) was performed analogously to **8** yielding **7** (134 mg, 78%) as an off-white solid. Mp: 131-133 °C; IR (neat): 3507 (m), 3293 (br, m), 1712 (s), 1459 (m), 1344 (m), 1310 (s), 1281 (m), 1234 (s), 1159 (m), 1114 (s), 1018 (m), 841 (m); <sup>1</sup>H NMR (400 MHz, CD<sub>3</sub>OD): 7.03 (s, 1H), 6.80 (s, 1H), 3.67 (s, 3H), 3.66 (s, 2H); <sup>13</sup>C NMR (101 MHz, CD<sub>3</sub>OD): 173.6, 149.5, 145.4, 126.1 (q, <sup>1</sup>*J* (C,F)= 271.5 Hz), 125.4 (q, <sup>3</sup>*J* (C,F) = 1.8 Hz), 120.9 (q, <sup>2</sup>*J* (C,F) = 30.2 Hz), 120.6, 114.1 (q, <sup>3</sup>*J* (C,F) = 5.5 Hz), 52.5, 38.1 (q, <sup>4</sup>*J* (C,F) = 2.2 Hz); HRMS (ESI, MeOH): calcd for C<sub>10</sub>H<sub>9</sub>F<sub>3</sub>O<sub>4</sub>+Na: 273.0345, found: 273.0346.

**Compound 35.** A mixture of **33** (153 mg, 439 μmol), sodium methanesulfinate (67.3 mg, 659 μmol), L-proline (20.4 mg, 176 μmol) and Cu(OAc)<sub>2</sub> (31.9 mg, 176 μmol) was suspended in DMSO and the mixture was heated to 100 °C for 24 h in a sealed tube. The reaction mixture was cooled to rt and quenched with sat. aq. NH<sub>4</sub>Cl, diluted with water and extracted with EtOAc. The combined organic layers were subjected to a liquid-liquid extraction with water and brine, and dried over Na<sub>2</sub>SO<sub>4</sub>. The residue was subjected to flash column chromatography (pentane/Et<sub>2</sub>O, 1:1, 1%

Et<sub>3</sub>N) to yield **35** (102 mg, 77%) as a yellowish solid. *R<sub>f</sub>* (pentane/Et<sub>2</sub>O, 1:1): 0.41; Mp: 117-119 °C; IR (neat): 3019 (w), 2988 (w), 2966 (w), 2923 (w), 1727 (s), 1496 (s), 1300 (m), 1244 (m), 1196 (m), 1136 (m), 983 (m), 830 (s), 764 (m); <sup>1</sup>H NMR (400 MHz, CDCl<sub>3</sub>): 7.38 (s, 1H), 6.68 (s, 1H), 4.11 (s, 2H), 3.73 (s, 3H), 3.10 (s, 3H), 1.70 (s, 6H); <sup>13</sup>C NMR (101 MHz, CDCl<sub>3</sub>): 171.9, 151.8, 147.4, 131.7, 129.0, 120.8, 112.3, 109.7, 52.4, 45.1, 38.2, 26.1; HRMS (ESI, MeOH): calcd for C<sub>13</sub>H<sub>16</sub>O<sub>6</sub>S+Na: 323.0560, found: 323.0561.

**Compound 2.** Deprotection of **35** (96.0 mg, 320 μmol) was performed analogously to **8** yielding **2** (37.3 mg, 45%) as a hygroscopic, orange solid. IR (neat): 3362 (br, m), 3027 (w), 2957 (w), 1721 (m), 1595 (m), 1520 (m), 1440 (m), 1293 (s), 1208 (m), 1128 (s), 764 (m); <sup>1</sup>H NMR (400 MHz, CD<sub>3</sub>OD): 7.38 (s, 1H), 6.78 (s, 1H), 3.99 (s, 2H), 3.69 (s, 3H), 3.06 (s, 3H); <sup>13</sup>C NMR (101 MHz, CD<sub>3</sub>OD): 173.8, 151.6, 146.0, 130.3, 127.5, 120.7, 117.6, 52.5, 45.2, 38.6; HRMS (ESI, H<sub>2</sub>O): calcd for C<sub>10</sub>H<sub>12</sub>O<sub>6</sub>S+Na: 283.0247, found: 283.0249.

**Compound 1** was prepared according to the procedure reported in ref. S4.

**Compound 5** was prepared according to the procedure reported in ref. S5.

**Compound 31** was prepared according to the procedure reported in ref. S6.

### 3. Formation of boronate esters in solution

#### 3.1. Direct titration

The dissociation constants ( $K_D$ ) of the boronate esters in aqueous 75% MeOH (100 mM HEPES, pH 7.8) were determined with UV-Vis titration experiments (Fig. 2). Representative examples are shown in Fig. S1. The  $K_D$ 's were deduced from equation (S1) for 1:1 binding motif:<sup>S7</sup>

$$\Delta A = \frac{(\Delta A_{\max})}{[C]_0} \times (0.5 \times [B] + 0.5 \times ([C]_0 + K_D) - (0.5 \times ([B]^2) + (2 \times ([B]) \times (K_D - [C]_0)) + (K_D + [C]_0)^2)^{0.5}) \quad (S1)$$

where  $\Delta A = A - A_0$ ,  $[B]$  = concentration of **10**, **11** or **12**, and  $[C]$  = concentration of the catechol. Values for couples **10-3**, **10-4**, **10-6**, **12-3**, **12-4** and **12-6** were taken from ref S1.

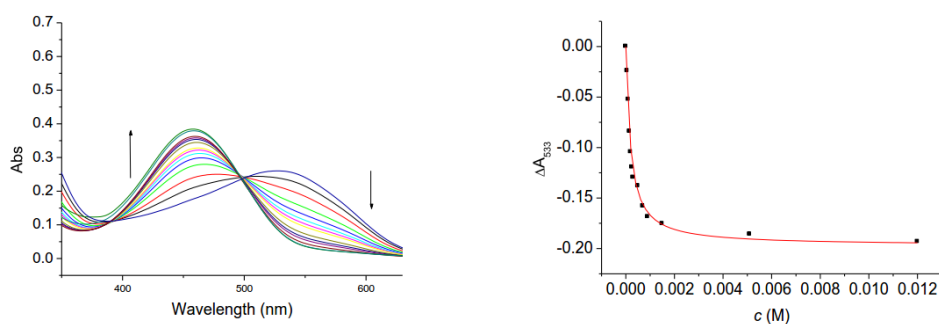

**Fig. S1.** UV-Vis spectra of **4** (45  $\mu$ M) in aqueous 75% MeOH (100 mM HEPES, pH 7.8) in the presence of 0-12 mM **11**.

### 3.2. Reverse titration

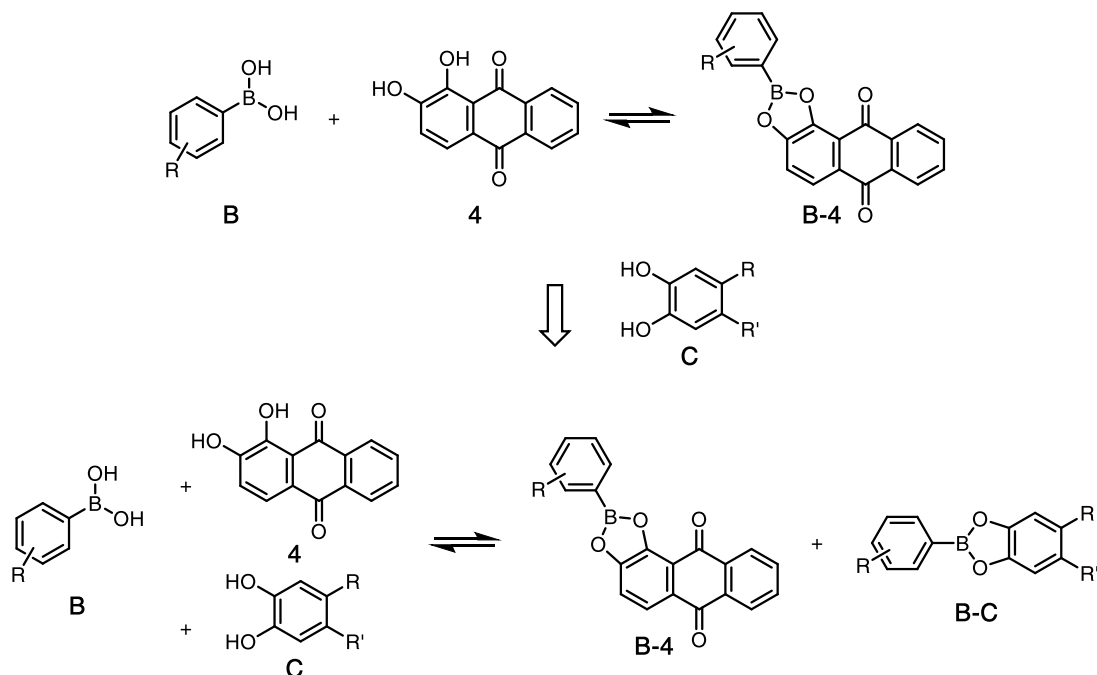

**Scheme S3.** Equilibria in solution during the determination of the dissociation constant of boronate ester **B-C** by reverse titration of boronate esters **B-4** with catechols **C**.

The  $K_D$ 's of non-UV-active boronate esters (**B-C**) were determined similarly by reverse titration, in which alizarin red (**4**) was added to the mixture to serve as an indicator (Scheme S3). Representative examples are shown in Fig. S2. The  $K_D(\mathbf{B-C})$  can be expressed by the following equation:

$$K_D(\mathbf{B-C}) = ([\mathbf{B}_f] \times [\mathbf{C}_f]) / [\mathbf{B-C}] \quad (\text{S2})$$

where  $[\mathbf{B}_f]$  = concentration of free boronic acid **B** (**10-12**),  $[\mathbf{C}_f]$  = concentration of free catechol **C** (**2, 5, 7-9**),  $[\mathbf{B-C}]$  = concentration of boronate ester **B-C**.

Considering

$$[\mathbf{B}] = [\mathbf{B}_f] + [\mathbf{B-4}] + [\mathbf{B-C}] \quad (\text{S3})$$

where  $[\mathbf{B-4}]$  = concentration of boronate ester **B-4**, we can obtain

$$[\mathbf{B-C}] = [\mathbf{B}] - ([\mathbf{B}_f] + [\mathbf{B-4}]) \quad (\text{S4})$$

The value of ( $[B_f] + [B-4]$ ) can be obtained by comparing the absorbance at 533 nm of the reverse titration (e.g., fig. S2) with the direct titration of **4** with **B** (e.g., fig. S1). By finding the same absorbance at 533 nm in the latter, we can find

$$[B_f] + [B-4] = [B]_{\text{direct}} \quad (\text{S5})$$

where  $[B]_{\text{direct}}$  = concentration of boronic acid **B** retrieved from the direct titration, and thus

$$[B_f] = [B]_{\text{direct}} - [B-4] \quad (\text{S6})$$

Combining eq. S4 with eq. S5, we obtain

$$[B-C] = [B] - [B]_{\text{direct}} \quad (\text{S7})$$

Additionally, we can rewrite

$$[C]_0 = [C_f] + [B-C] \quad (\text{S8})$$

as

$$[C_f] = [C]_0 - [B-C] \quad (\text{S9})$$

As a result, eq. S2 can be rewritten as

$$K_D(B-C) = (([B]_{\text{direct}} - [B-4]) \times ([C]_0 - ([B] - [B]_{\text{direct}}))) / ([B] - [B]_{\text{direct}}) \quad (\text{S10})$$

where,  $[B-4]$  can be obtained by comparing the absorbance at 533 nm to those obtained by the direct titration of **4** with **B** (e.g., fig. S1).

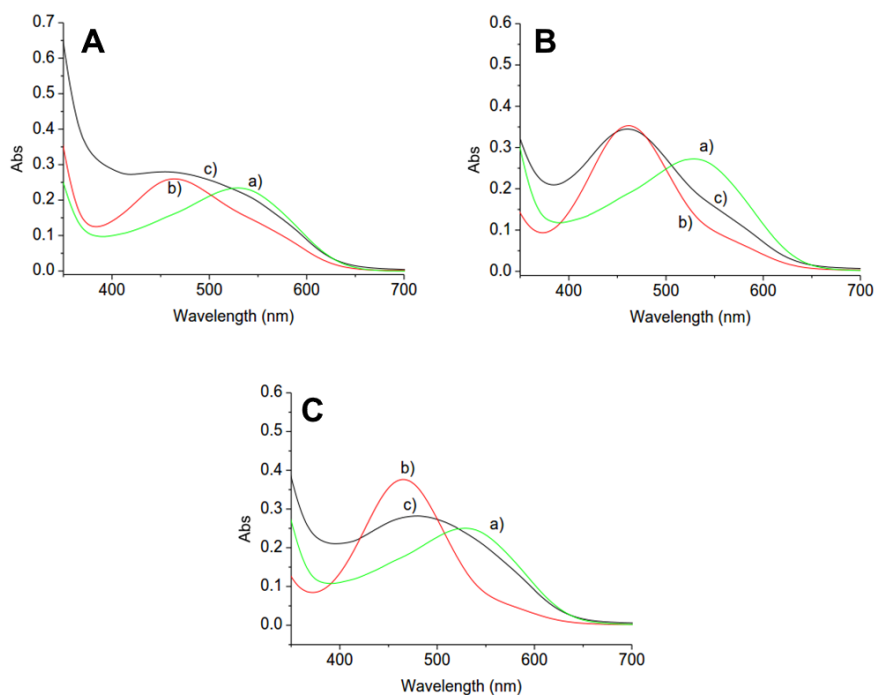

**Fig. S2.** A: UV-Vis spectra of a) **4** (45  $\mu$ M), b) **4** (45  $\mu$ M) and **10** (1.2 mM), and c) **4** (45  $\mu$ M), **10** (1.2 mM) and **5** (1.6 mM). B: UV-Vis spectra of a) **4** (45  $\mu$ M), b) **4** (45  $\mu$ M) and **11** (520  $\mu$ M), and c) **4** (45  $\mu$ M), **11** (520  $\mu$ M) and **5** (1.6 mM). C: UV-Vis spectra of a) **4** (45  $\mu$ M), b) **4** (45  $\mu$ M) and **12** (300  $\mu$ M), and c) **4** (45  $\mu$ M), **12** (300  $\mu$ M) and **5** (800  $\mu$ M).

**Table S1.** Dissociation constants  $K_D$  for boronic esters obtained from boronic acids **10-12** and catechols **1-9**<sup>a</sup>

| Boronic acid | $K_D$ (mM) |                       |                   |                   |                       |                   |                       |                       |                       |
|--------------|------------|-----------------------|-------------------|-------------------|-----------------------|-------------------|-----------------------|-----------------------|-----------------------|
|              | <b>1</b>   | <b>2</b> <sup>b</sup> | <b>3</b>          | <b>4</b>          | <b>5</b> <sup>b</sup> | <b>6</b>          | <b>7</b> <sup>b</sup> | <b>8</b> <sup>b</sup> | <b>9</b> <sup>b</sup> |
| <b>10</b>    | 0.28       | 0.62                  | 1.04 <sup>c</sup> | 1.46 <sup>c</sup> | 2.50                  | 4.20 <sup>c</sup> | 5.70                  | 6.90                  | 33.0                  |
| <b>11</b>    | 0.21       | 0.34                  | 0.31              | 0.17              | 0.50                  | 0.10              | 1.10                  | 1.40                  | 1.10                  |
| <b>12</b>    | 0.03       | 0.08                  | 0.17 <sup>c</sup> | 0.09 <sup>c</sup> | 0.10                  | 0.03 <sup>c</sup> | 0.26                  | 0.30                  | 0.30                  |

<sup>a</sup>From changes in absorption in MeOH/H<sub>2</sub>O 3:1 (100 mM HEPES, pH 7.8) upon direct or <sup>b</sup>reverse titration with **4**. <sup>c</sup>From ref. S1.

#### 4. Orthogonal dynamic covalent bonds in solution

All experiments were run using DMSO-*d*<sub>6</sub> dried over molecular sieves (3 Å), at rt.

**Condition A:** DMSO-*d*<sub>6</sub>, 10% D<sub>2</sub>O, 2% DIPEA.

**Condition B:** DMSO-*d*<sub>6</sub>, 1.0 mM **19**, 1.5 mM TFA.

**Condition C:** DMSO-*d*<sub>6</sub>, 2.0 mM **23**, 2.0 mM TEA.

**Condition D:** DMSO-*d*<sub>6</sub>.

**Condition B\*:** DMSO-*d*<sub>6</sub>, 11.0 mM aniline, 11.5 mM TFA.

**Stock solution B:** **19** (8 mg, 50 μmol) and TFA (5.8 μL, 76 μmol) were dissolved in DMSO-*d*<sub>6</sub> (0.50 mL).

**Stock solution C:** **23** (1.2 μL, 10 μmol) and TEA (1.4 μL, 10 μmol) were dissolved in DMSO-*d*<sub>6</sub> (0.50 mL).

**Stock solution B\*:** aniline (50 μL, 55 μmol) and TFA (44 μL, 580 μmol) were dissolved in DMSO-*d*<sub>6</sub> (0.50 mL).

In most experiments, TES (20 mM) was also included to serve as an internal standard.



#### 4.1. Boronate ester exchange in solution

**Boronate ester stock solution:** To a solution of **10** (9 mg, 40  $\mu\text{mol}$ ) in  $\text{DMSO-}d_6$  (1.80 mL), was added **1** (11 mg, 44  $\mu\text{mol}$ ) and the solution was shaken. After verifying the complete formation of **13** by  $^1\text{H}$  NMR spectroscopy, **8** (12 mg, 44  $\mu\text{mol}$ ) was added to the solution and after shaking, the solution was used for the exchange experiments.

**Condition A:** To 0.45 mL of the boronate ester stock solution in an NMR tube, was added 10.0  $\mu\text{L}$  of DIPEA and 50  $\mu\text{L}$  of  $\text{D}_2\text{O}$ . After shaking, the solution was subjected to  $^1\text{H}$  NMR spectroscopy to monitor the evolution of the exchange processes (Figs. S4, S3  $\bullet$ , 3A  $\bullet$ ).

**Condition B:** To 0.45 mL of the boronate ester stock solution in an NMR tube, was added 5.0  $\mu\text{L}$  of stock solution B and the mixture was immediately shaken, as to avoid a higher local concentration in the sample. After addition of 45  $\mu\text{L}$  of  $\text{DMSO-}d_6$ , the solution was subjected to  $^1\text{H}$  NMR spectroscopy to monitor the evolution of the exchange processes (Figs. S6, S3  $\blacktriangle$ , 3B  $\bullet$ ).

**Condition C:** To 0.45 mL of the boronate ester stock solution in an NMR tube, was added 50  $\mu\text{L}$  of stock solution C. After shaking, the solution was subjected to  $^1\text{H}$  NMR spectroscopy to monitor the evolution of the exchange processes (Figs. S7, S3  $\blacksquare$ , 3C  $\bullet$ ).

**Condition D:** To 0.45 mL of the boronate ester stock solution in an NMR tube was added 50  $\mu\text{L}$  of  $\text{DMSO-}d_6$ . The solution was then subjected to  $^1\text{H}$  NMR spectroscopy to monitor the evolution of the exchange processes (Fig. S8, S3  $\blacklozenge$ ).

**Condition B\*:** To 0.45 mL of the boronate ester stock solution in an NMR tube, was added 5.0  $\mu\text{L}$  of stock solution B\* and the mixture was shaken. After addition of 45  $\mu\text{L}$  of  $\text{DMSO-}d_6$ , the solution was subjected to  $^1\text{H}$  NMR spectroscopy to monitor the evolution of the exchange processes (Fig. S19).

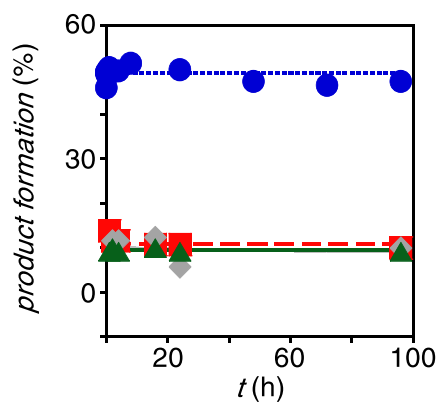

**Fig. S3.** Exchange kinetics for **13** and **8** in condition A ( $\bullet$ ), condition B ( $\blacktriangle$ ), condition C ( $\blacksquare$ ) and condition D (control,  $\blacklozenge$ ).

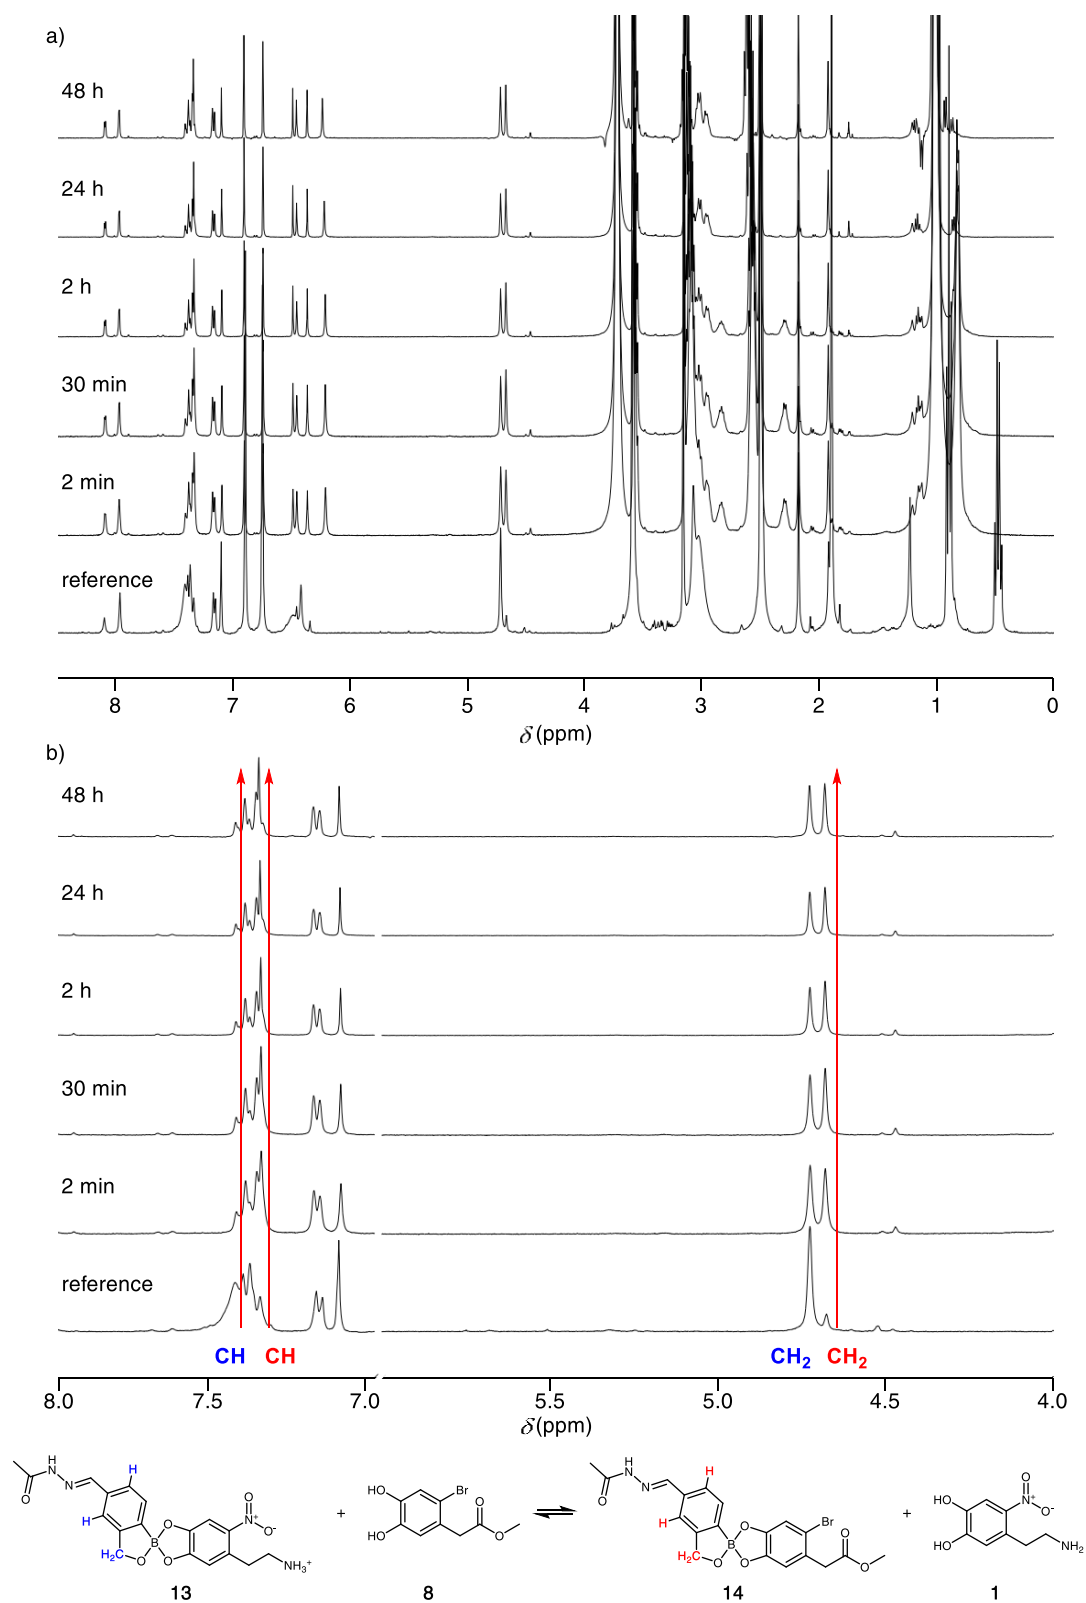

**Fig. S4.** a) <sup>1</sup>H NMR spectra of a mixture of **13** (20 mM) and **8** (22 mM) in condition A (DMSO-*d*<sub>6</sub>, 10% D<sub>2</sub>O, 2% DIPEA), b) zoom of the diagnostic peaks showing the evolution of the exchange processes. In blue is shown the position of the starting material, while red indicates the product of the exchange. The reference spectrum is taken from fig. S8.

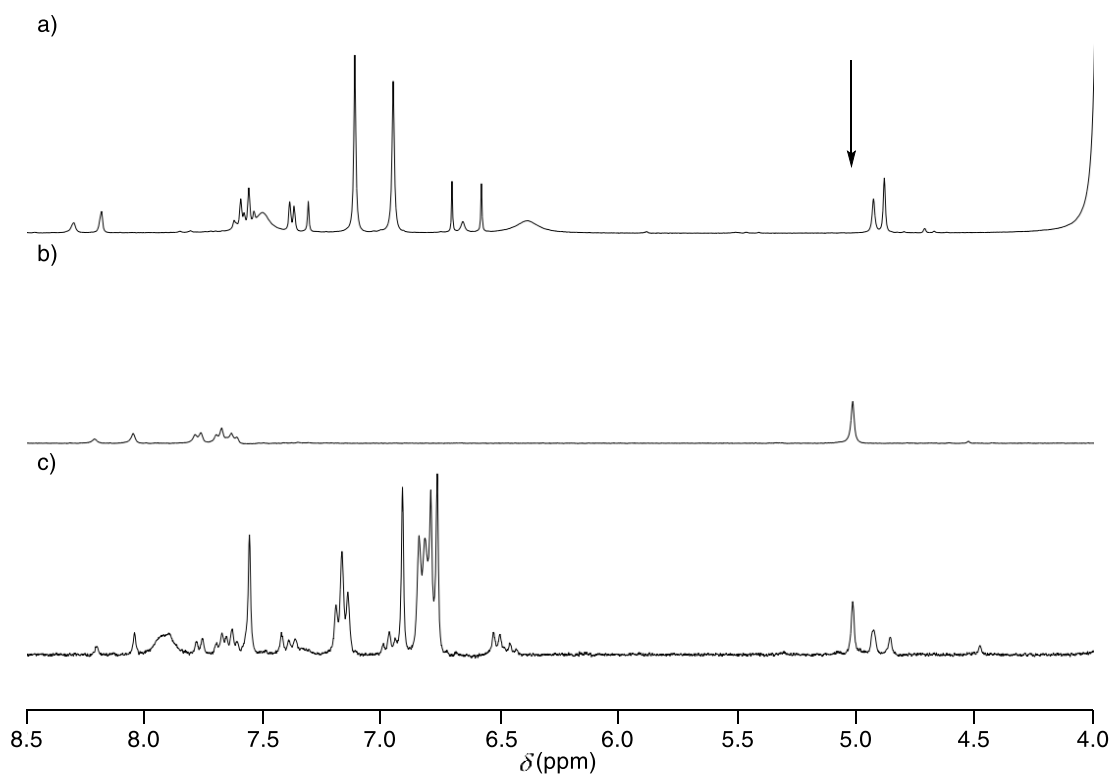

**Fig. S5.** a)  $^1\text{H}$  NMR spectrum of a mixture of **13** (20 mM) and **8** (22 mM) after 16 h in condition **A** (DMSO- $d_6$ , 10% D $_2$ O, 2% DIPEA), b)  $^1\text{H}$  NMR spectrum of benzoboroxole **10** in DMSO- $d_6$ , c)  $^1\text{H}$  NMR spectrum of a partially hydrolysed mixture of **13** (20 mM) and **8** (22 mM) after 18 h in condition **B\*** (DMSO- $d_6$ , 11.0 mM aniline, 11.5 mM TFA). The arrow shows the absence of hydrolysis product during exchange in condition **A**.

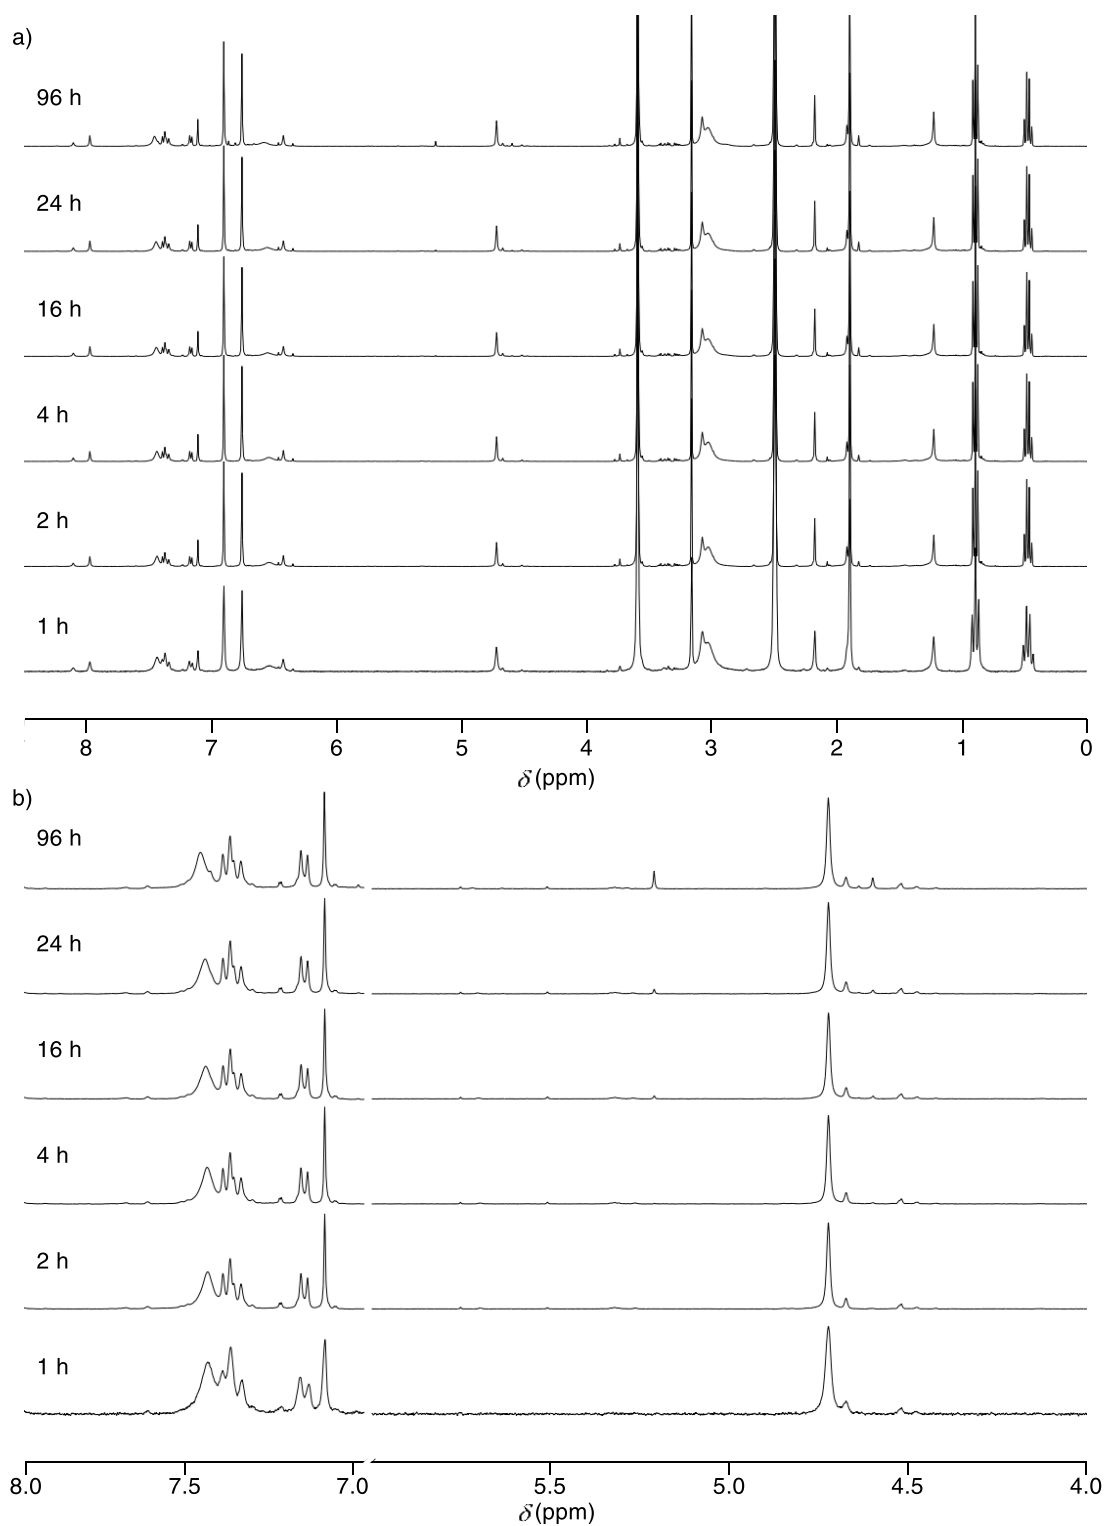

**Fig. S6.** a)  $^1\text{H}$  NMR spectra of a mixture of **13** (20 mM), **8** (22 mM) and TES (20 mM) in condition **B** (DMSO- $d_6$ , 1.0 mM **19**, 1.5 mM TFA), b) zoom of the diagnostic peaks showing the lack of evolution of the exchange processes.

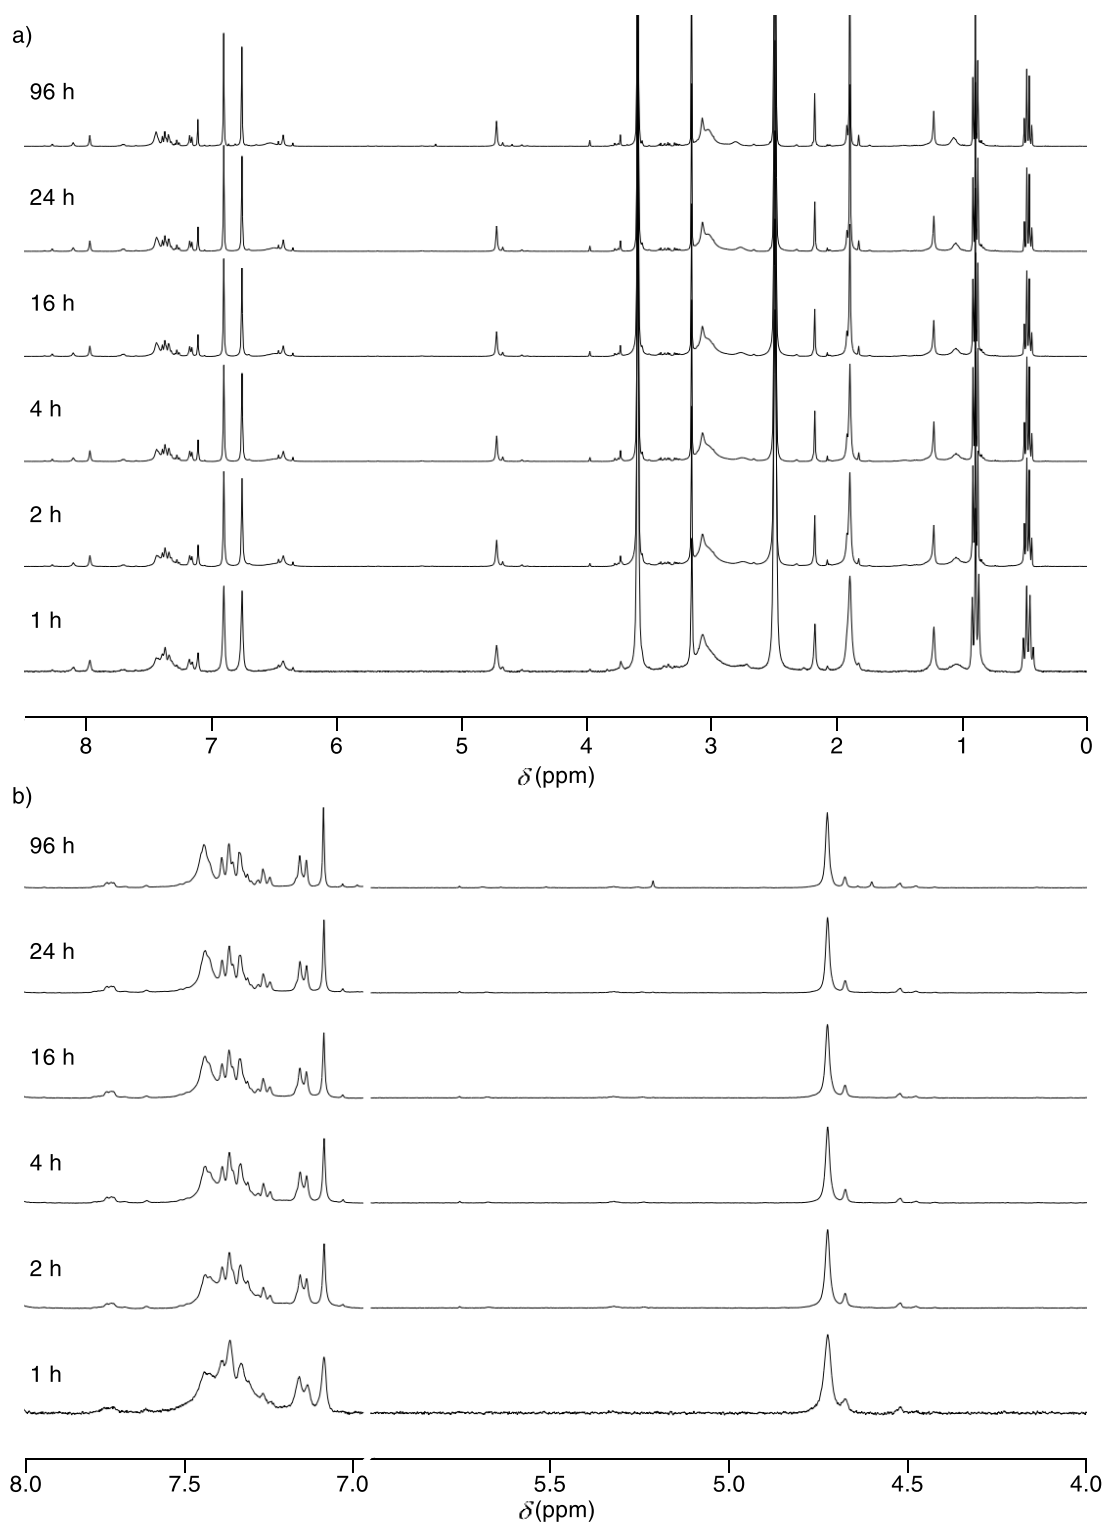

**Fig. S7.** a)  $^1\text{H}$  NMR spectra of a mixture of **13** (20 mM), **8** (22 mM) and TES (20 mM) in condition C (DMSO- $d_6$ , 2.0 mM **23**, 2.0 mM TEA), b) zoom of the diagnostic peaks showing the lack of evolution of the exchange processes.

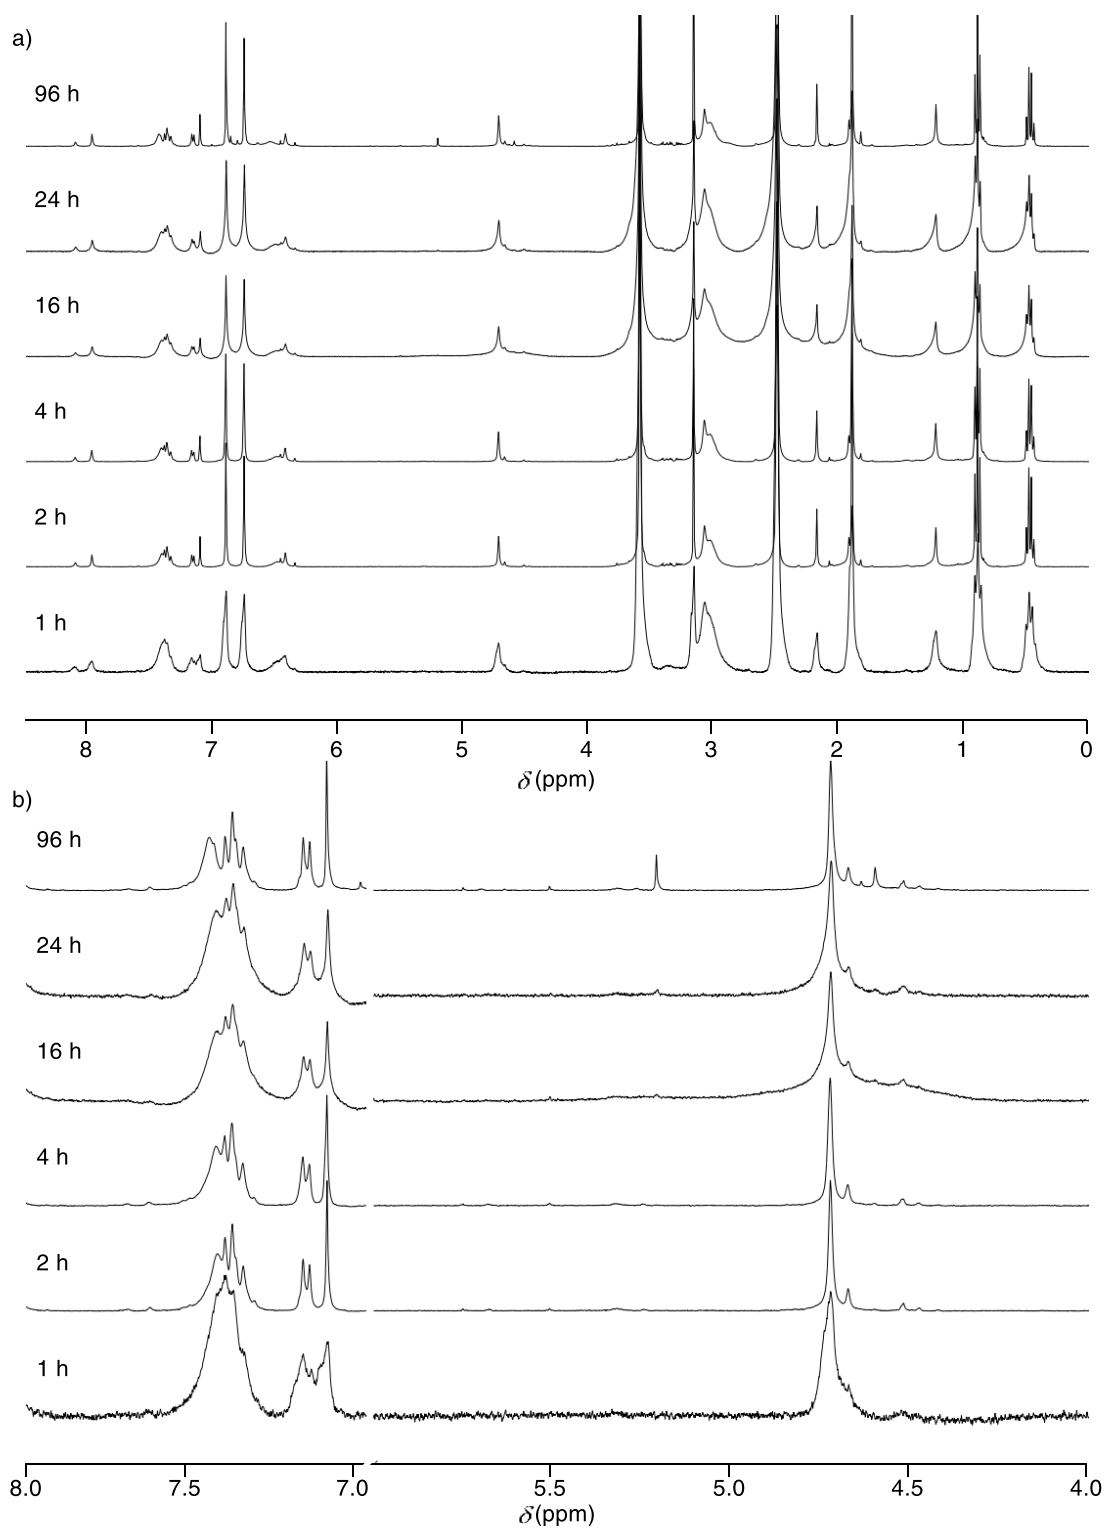

**Fig. S8.** a)  $^1\text{H}$  NMR spectra of a mixture of **13** (20 mM), **8** (22 mM) and TES (20 mM) in condition **D** ( $\text{DMSO-}d_6$ ), b) zoom of the diagnostic peaks showing the lack of evolution of the exchange processes.

## 4.2. Hydrazone exchange in solution

**Hydrazone stock solution:** To a solution of **16** (3 mg, 40  $\mu\text{mol}$ ) in  $\text{DMSO-}d_6$  (1.80 mL) was added **15** (9 mg, 40  $\mu\text{mol}$ ) and after shaking, the solution was used for the exchange experiments.

**Condition A:** To 0.45 mL of the hydrazone stock solution in an NMR tube, was added 10.0  $\mu\text{L}$  of DIPEA and 50  $\mu\text{L}$  of  $\text{D}_2\text{O}$ . After shaking, the solution was subjected to  $^1\text{H}$  NMR spectroscopy to monitor the evolution of the exchange processes (Figs. S11, S9●, 3A ▲).

**Condition B:** To 0.45 mL of the hydrazone stock solution in an NMR tube, was added 5.0  $\mu\text{L}$  of stock solution B and 45  $\mu\text{L}$  of  $\text{DMSO-}d_6$ . After shaking, the solution was subjected to  $^1\text{H}$  NMR spectroscopy to monitor the evolution of the exchange processes (Figs. S10, S9▲, 3B ▲).

**Condition C:** To 0.45 mL of the hydrazone stock solution in an NMR tube, was added 50  $\mu\text{L}$  of stock solution C. After shaking, the solution was subjected to  $^1\text{H}$  NMR spectroscopy to monitor the evolution of the exchange processes (Figs. S12, S9■, 3C ▲).

**Condition D:** To 0.45 mL of the hydrazone stock solution in an NMR tube was added 50  $\mu\text{L}$  of  $\text{DMSO-}d_6$ . The solution was then subjected to  $^1\text{H}$  NMR spectroscopy to monitor the evolution of the exchange processes (Figs. S13, S9◆).

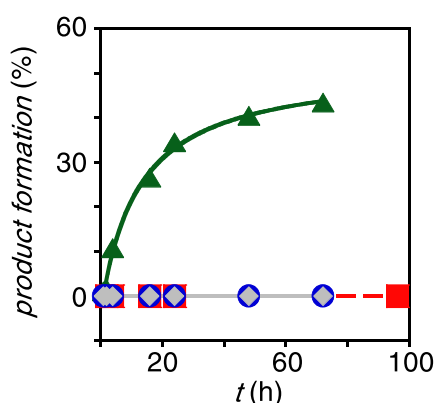

**Fig. S9.** Exchange kinetics for **15** and **16** in condition A (●), condition B (▲), condition C (■) and condition D (control, ◆).





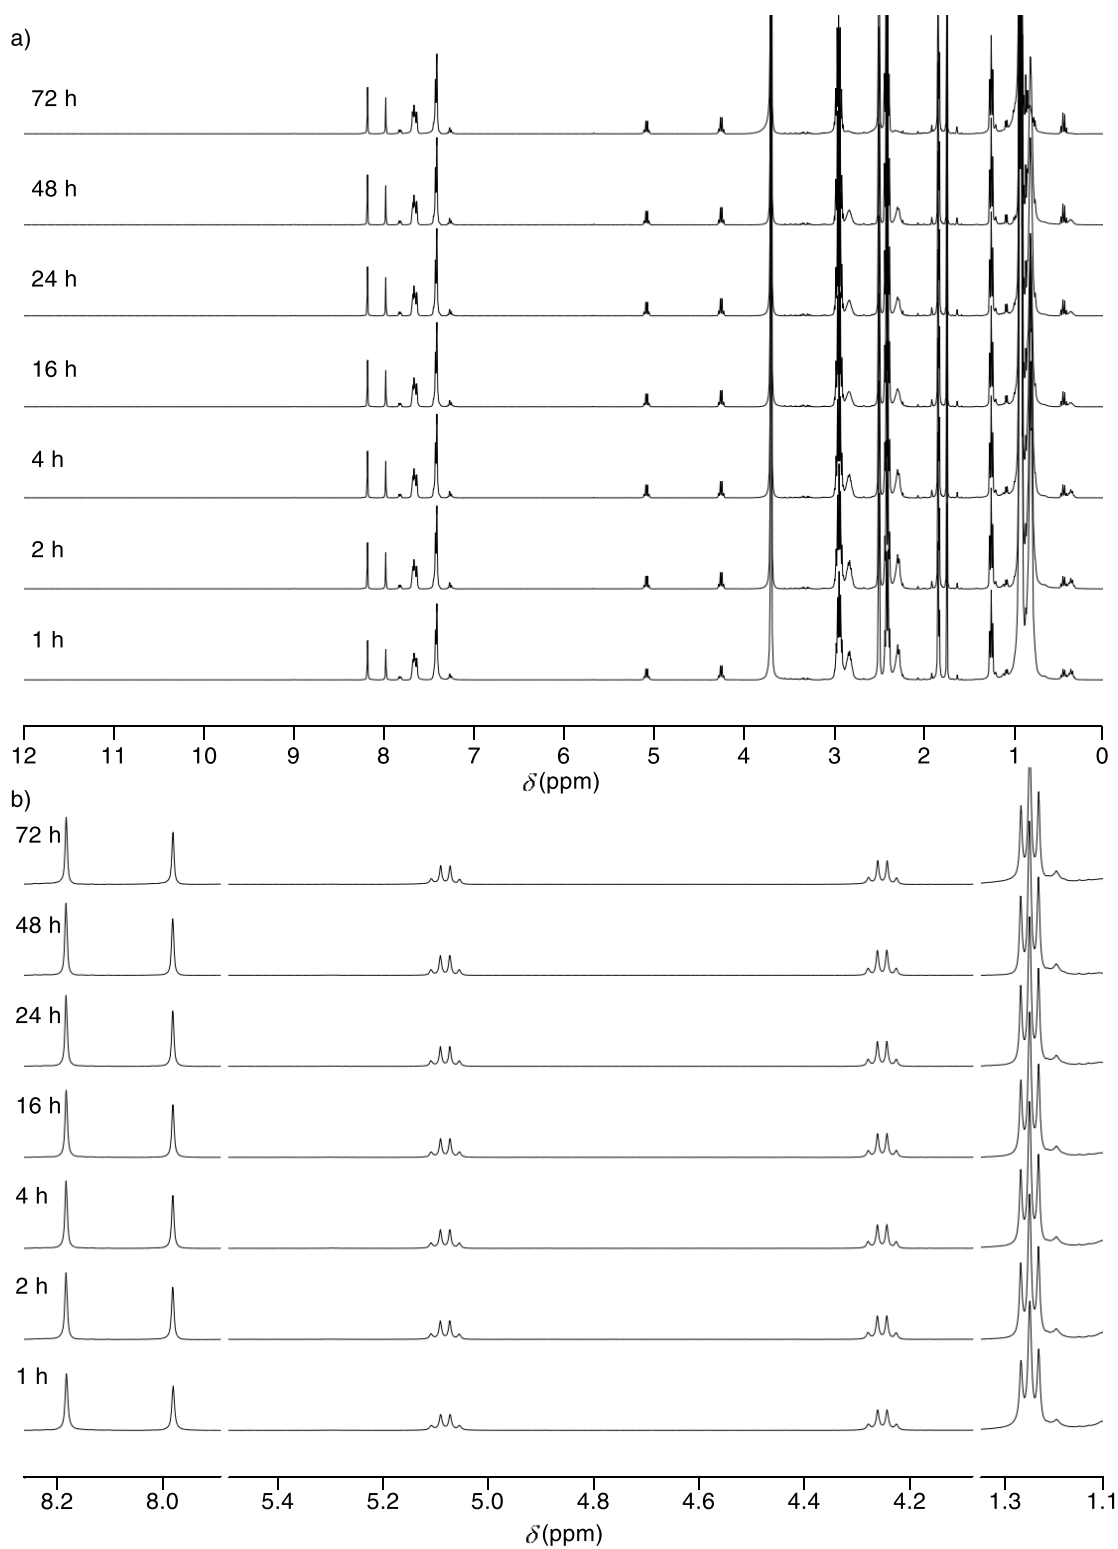

**Fig. S11.** a)  $^1\text{H}$  NMR spectra of a mixture of **15** (20 mM) and **16** (20 mM) in condition A (DMSO- $d_6$ , 10%  $\text{D}_2\text{O}$ , 2% DIPEA), b) zoom of the diagnostic peaks showing the lack of evolution of the exchange processes.

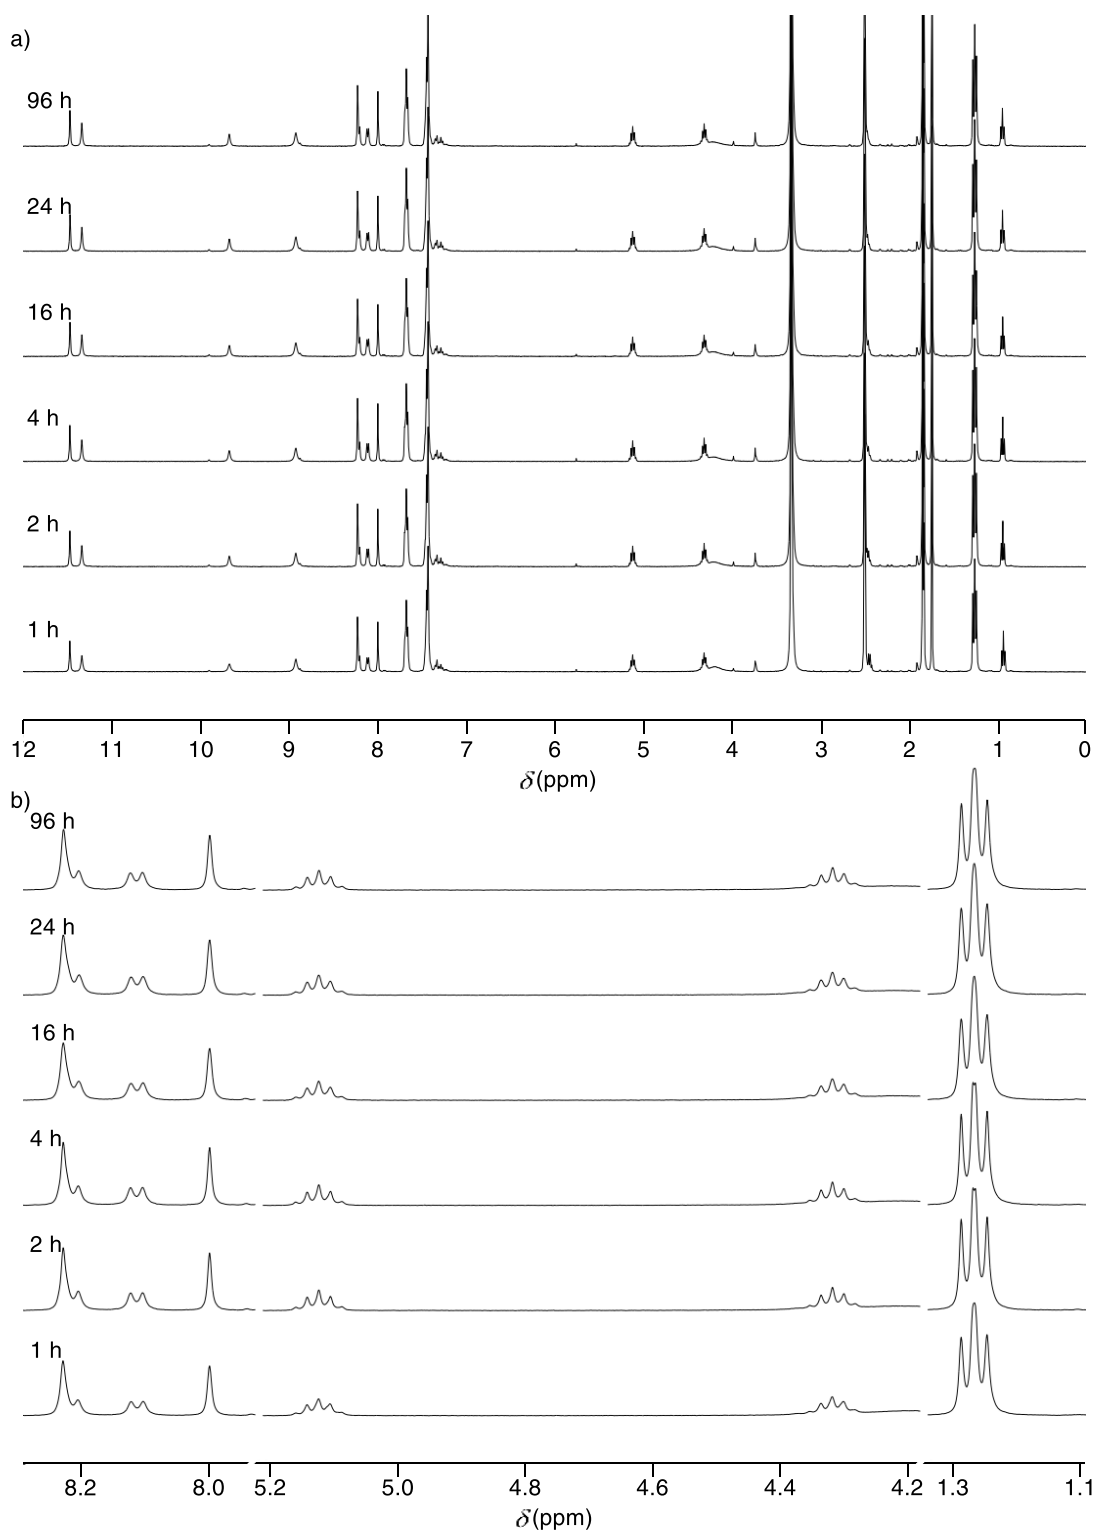

**Fig. S12.** a)  $^1\text{H}$  NMR spectra of a mixture of **15** (20 mM) and **16** (20 mM) in condition C (DMSO- $d_6$ , 2.0 mM **23**, 2.0 mM TEA), b) zoom of the diagnostic peaks showing the lack of evolution of the exchange processes.

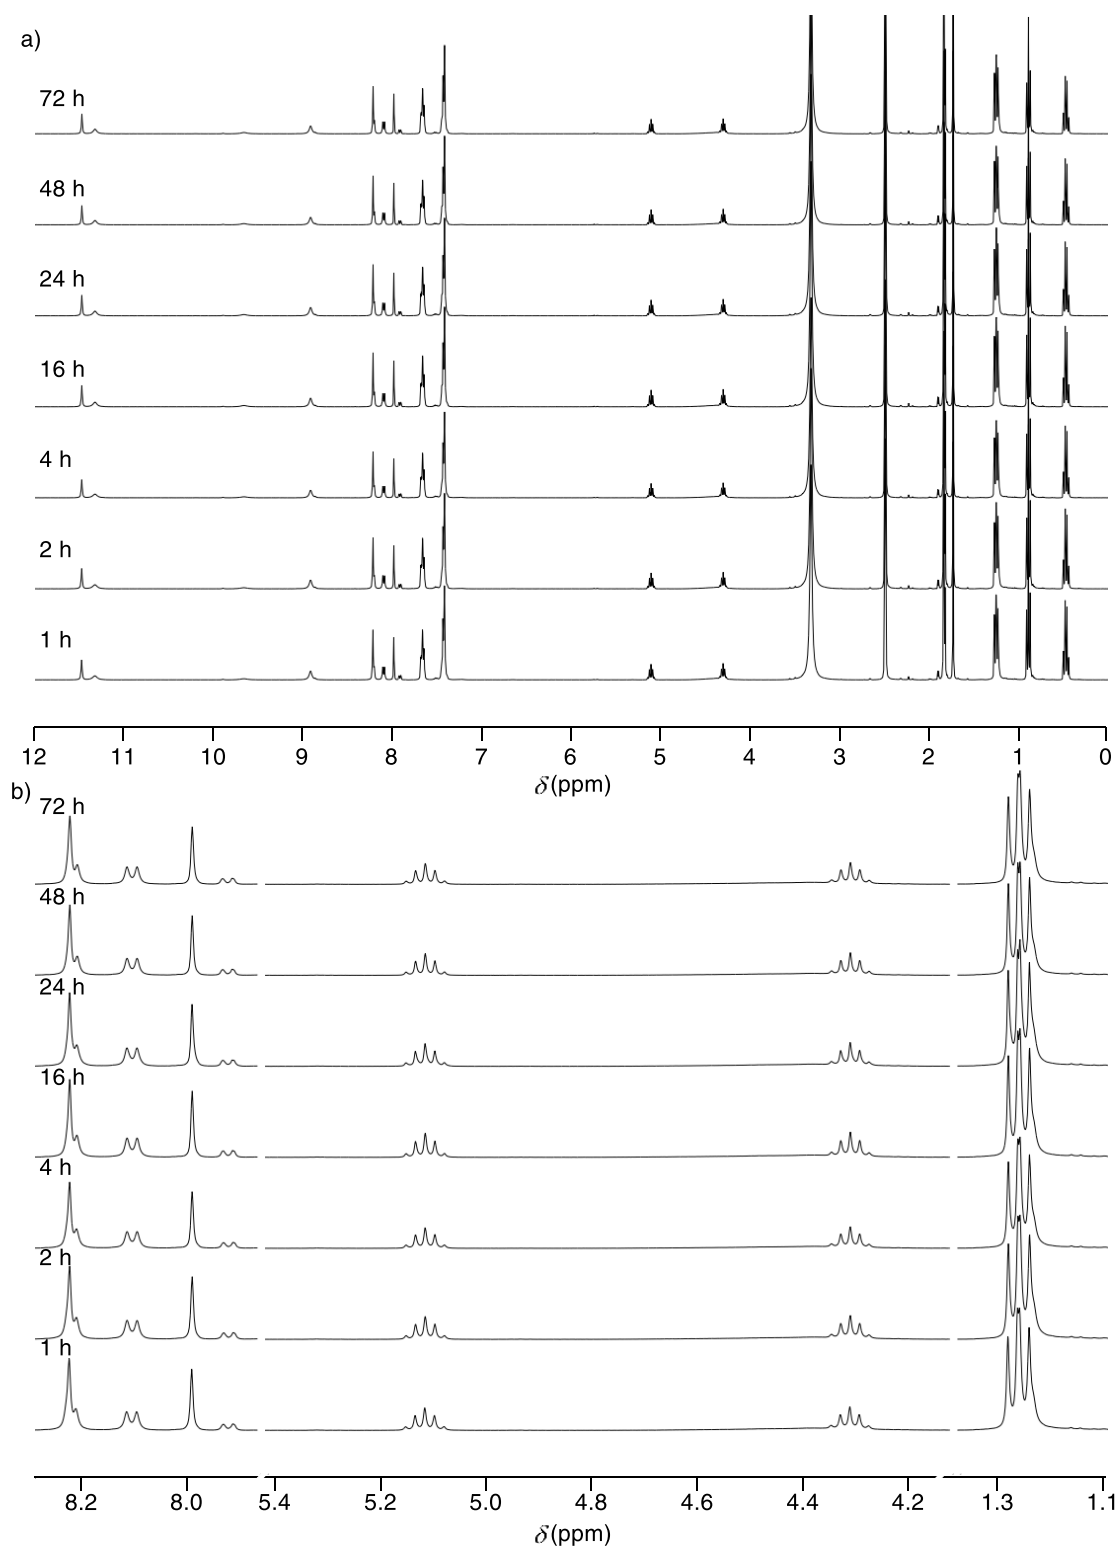

**Fig. S13.** a)  $^1\text{H}$  NMR spectra of a mixture of **15** (20 mM), **16** (20 mM) and TES (20 mM) in condition **D** ( $\text{DMSO-}d_6$ ), b) zoom of the diagnostic peaks showing the lack of evolution of the exchange processes.

### 4.3. Disulfide exchange in solution

**Disulfide stock solution:** To a solution of **20** (22 mg, 40  $\mu\text{mol}$ ) in  $\text{DMSO-}d_6$  (1.80 mL) was added **21** (10 mg, 40  $\mu\text{mol}$ ) and after shaking, the solution was used for the exchange experiments.

**Condition A:** To 0.45 mL of the disulfide stock solution in an NMR tube, was added 10.0  $\mu\text{L}$  of DIPEA and 50  $\mu\text{L}$  of  $\text{D}_2\text{O}$ . After shaking, the solution was subjected to  $^1\text{H}$  NMR spectroscopy to monitor the evolution of the exchange processes (Figs. S16, S14  $\bullet$ , 3A  $\blacksquare$ ).

**Condition B:** To 0.45 mL of the disulfide stock solution in an NMR tube, was added 5.0  $\mu\text{L}$  of stock solution B and 45  $\mu\text{L}$  of  $\text{DMSO-}d_6$ . After shaking, the solution was subjected to  $^1\text{H}$  NMR spectroscopy to monitor the evolution of the exchange processes (Figs. S17, S14  $\blacktriangle$ , 3B  $\blacksquare$ ).

**Condition C:** To 0.45 mL of the disulfide stock solution in an NMR tube, was added 50  $\mu\text{L}$  of stock solution C. After shaking, the solution was subjected to  $^1\text{H}$  NMR spectroscopy to monitor the evolution of the exchange processes (Figs. S15, S14  $\blacksquare$ , 3C  $\blacksquare$ ).

**Condition D:** To 0.45 mL of the disulfide stock solution in an NMR tube was added 50  $\mu\text{L}$  of  $\text{DMSO-}d_6$ . The solution was then subjected to  $^1\text{H}$  NMR spectroscopy to monitor the evolution of the exchange processes (Figs. S18, S14  $\blacklozenge$ ).

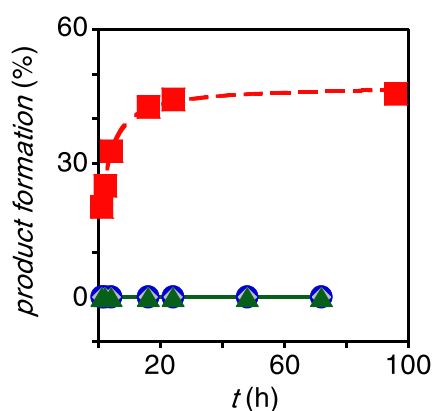

**Fig. S14.** Exchange kinetics for **20** and **21**, in condition A ( $\bullet$ ), condition B ( $\blacktriangle$ ), condition C ( $\blacksquare$ ) and condition D (control,  $\blacklozenge$ ).

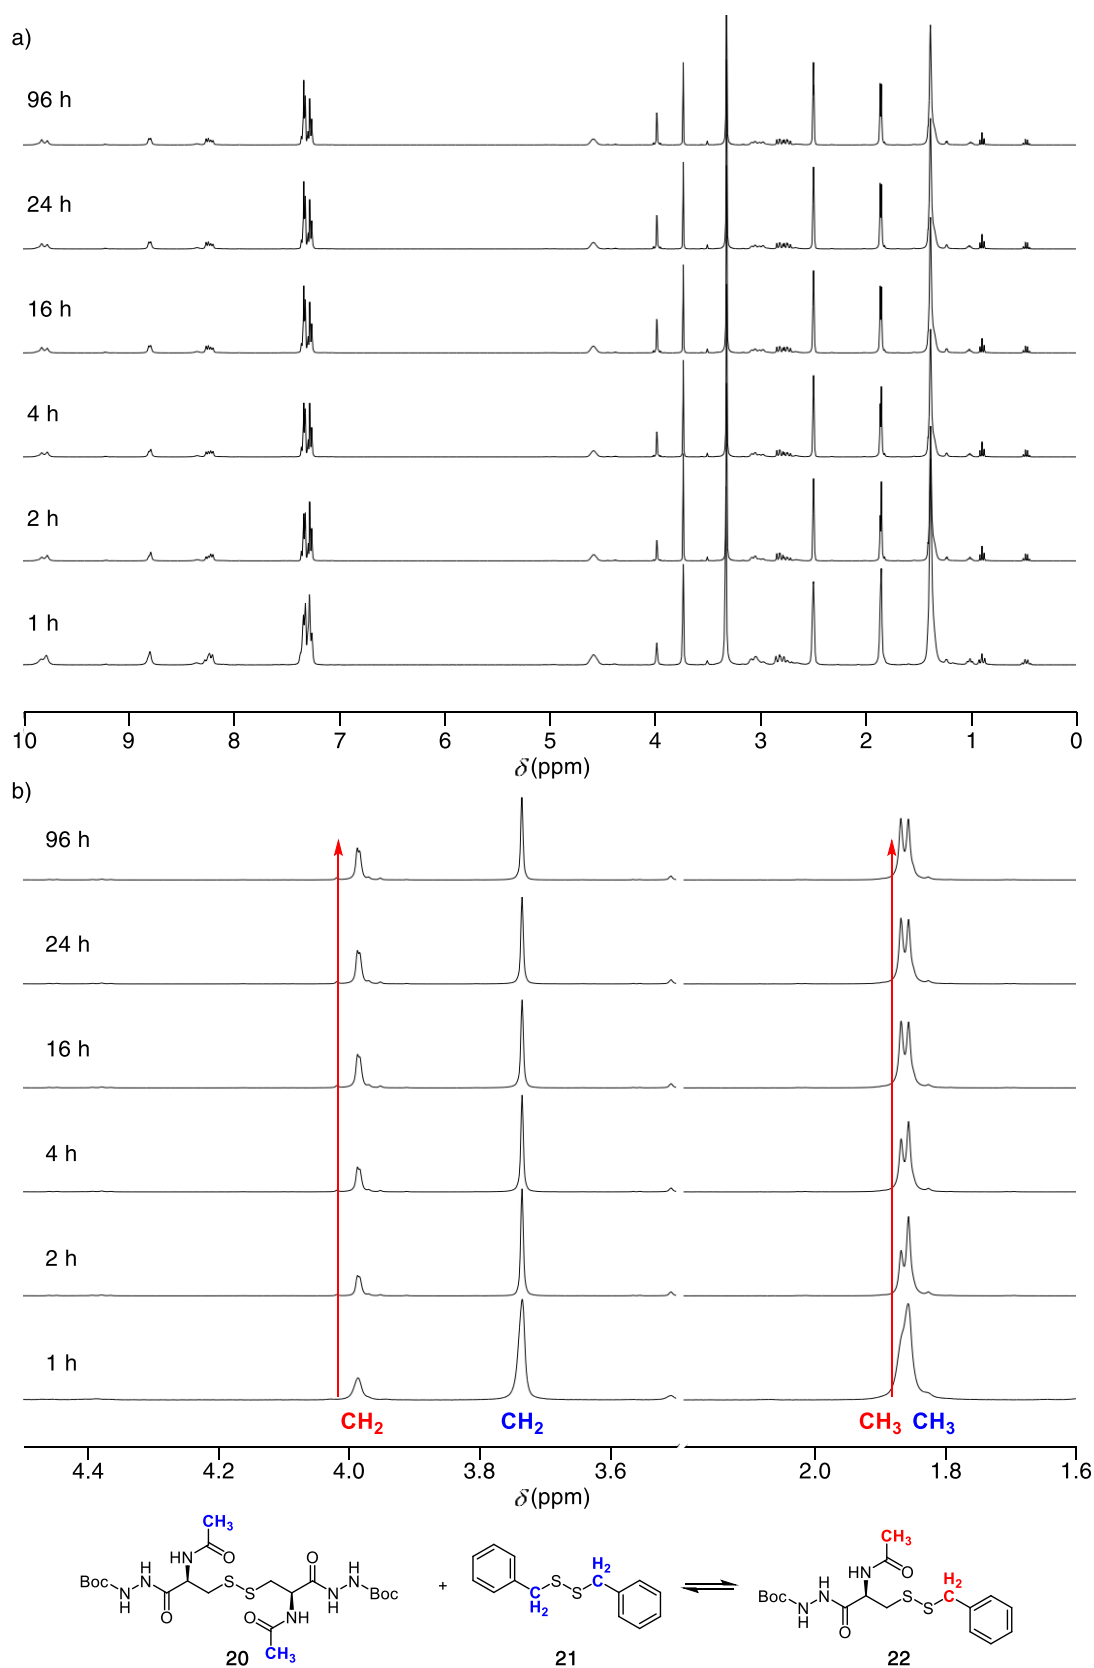

**Fig. S15.** a)  $^1\text{H}$  NMR spectra of a mixture of **20** (20 mM), **21** (20 mM) and TES (20 mM) in condition C (DMSO- $d_6$ , 2.0 mM **23**, 2.0 mM TEA), b) zoom of the diagnostic peaks showing the evolution of the exchange processes. In blue is shown the position of the starting material, while red indicates the product of the exchange.

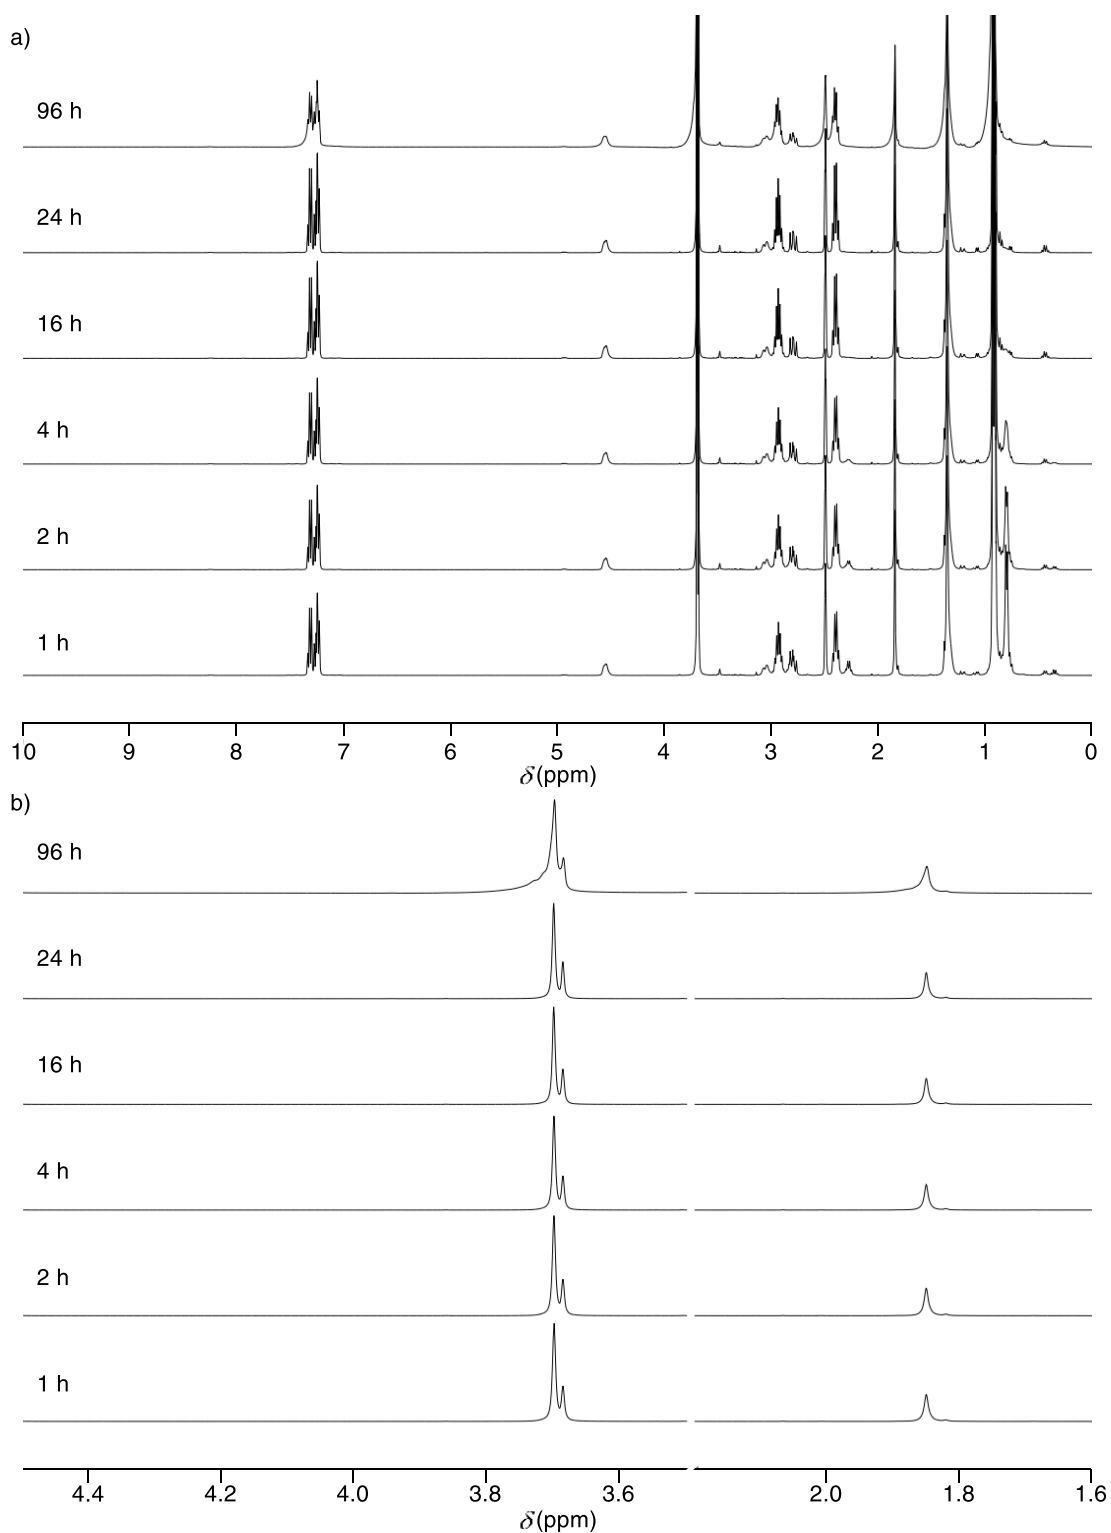

**Fig. S16.** a)  $^1\text{H}$  NMR spectra of a mixture of **20** (20 mM) and **21** (20 mM) in condition **A** ( $\text{DMSO-}d_6$ , 10%  $\text{D}_2\text{O}$ , 2% DIPEA), b) zoom of the diagnostic peaks showing the lack of evolution of the exchange processes. The peak at 3.7 ppm corresponds to the water peak.

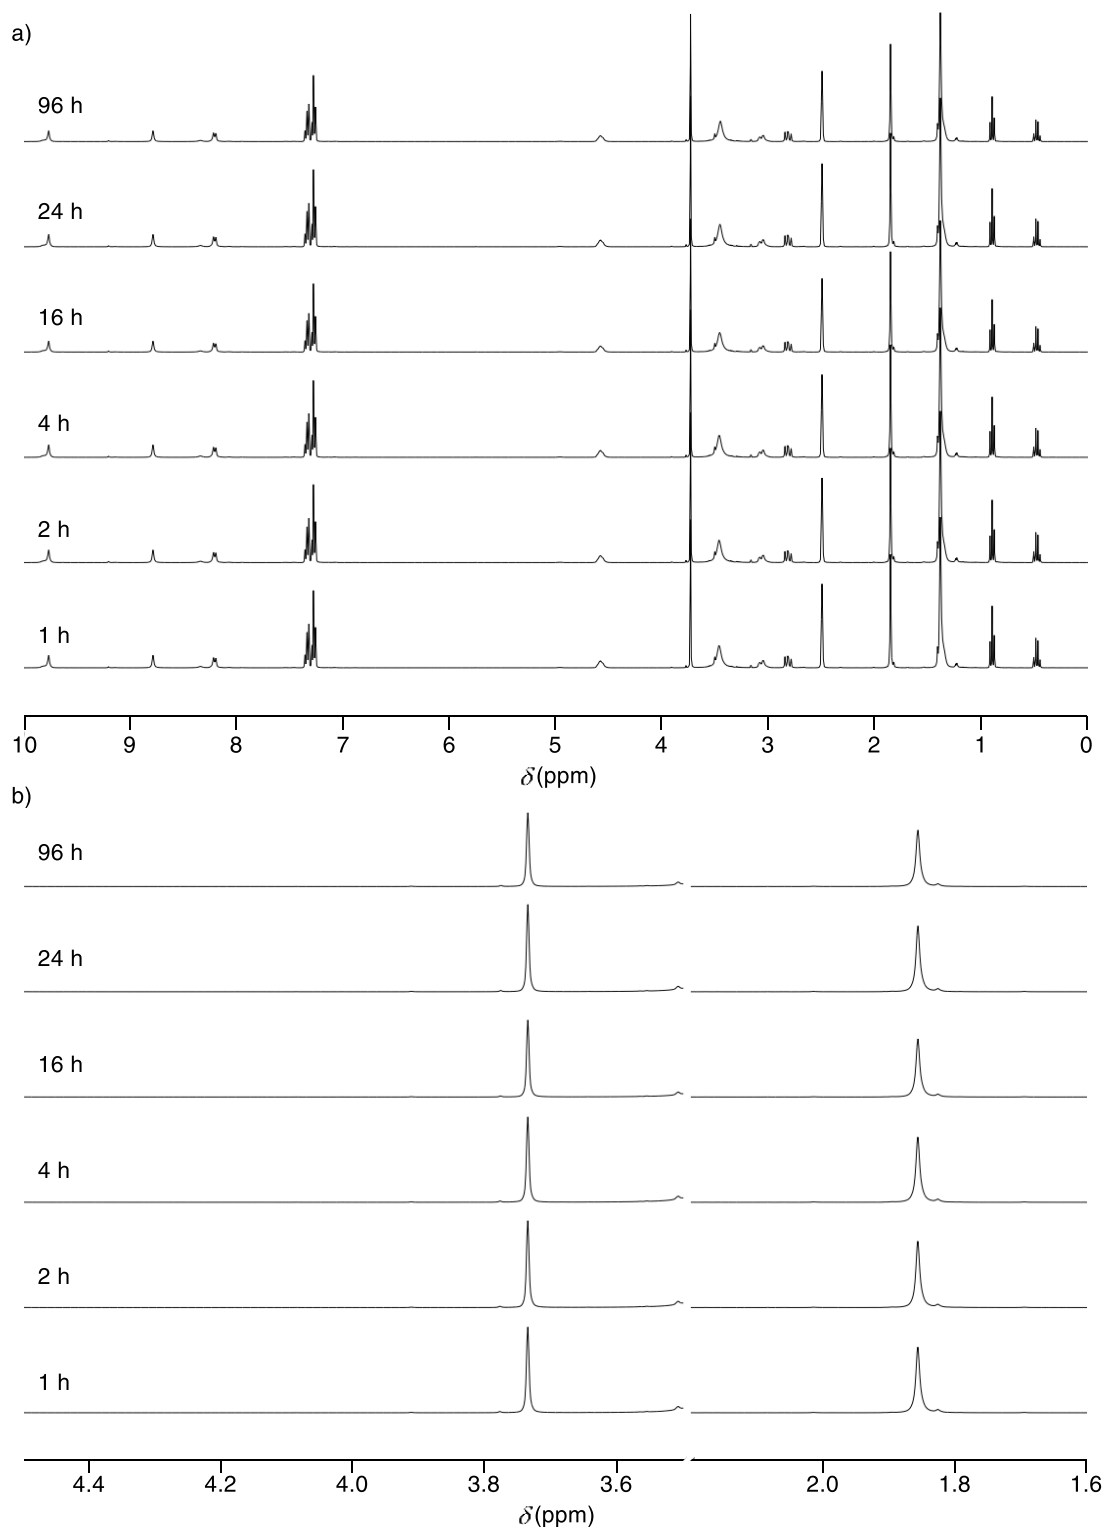

**Fig. S17.** a)  $^1\text{H}$  NMR spectra of a mixture of **20** (20 mM), **21** (20 mM) and TES (20 mM) in condition **B** (DMSO- $d_6$ , 1.0 mM **19**, 1.5 mM TFA), b) zoom of the diagnostic peaks showing the lack of evolution of the exchange processes.

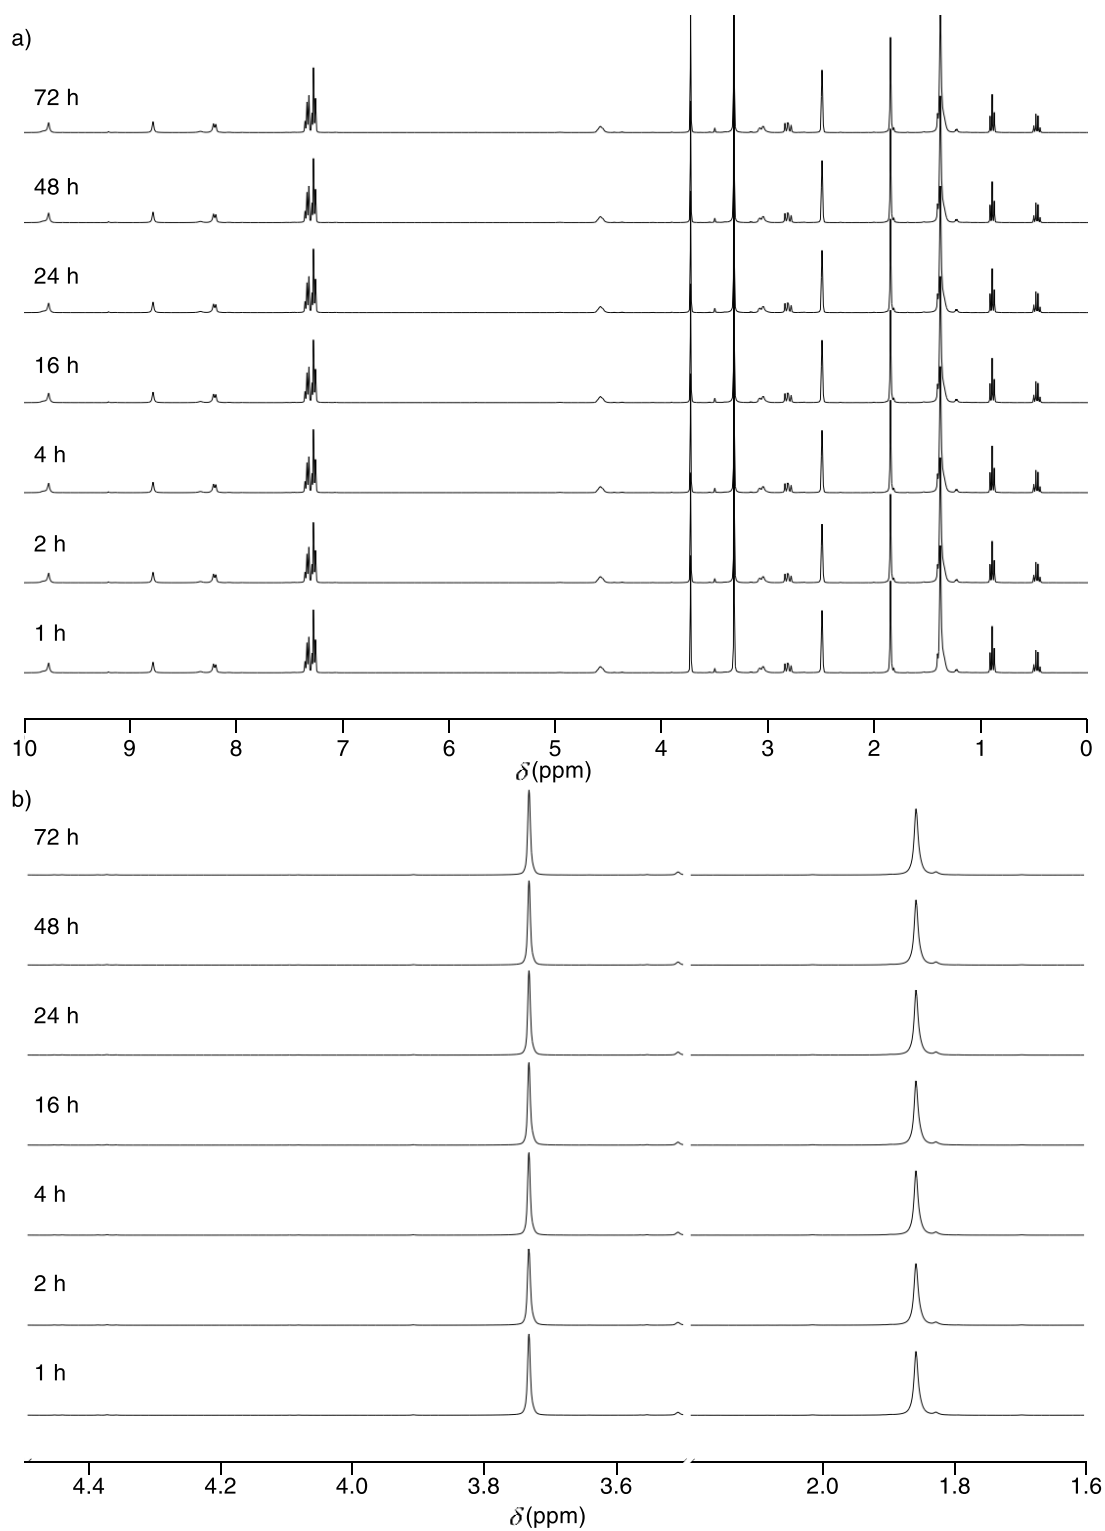

**Fig. S18.** a)  $^1\text{H}$  NMR spectra of a mixture of **20** (20 mM), **21** (20 mM) and TES (20 mM) in condition **D** ( $\text{DMSO-}d_6$ ), b) zoom of the diagnostic peaks showing the lack of evolution of the exchange processes.



## 4.4. Control experiments in solution

### 4.4.1. Non-orthogonal hydrazone exchange conditions

Classical hydrazone exchange conditions involve the use of acid and often the use of aniline as a catalyst. In an attempt to identify mild conditions in which the exchange takes place, condition **B\*** (DMSO-*d*<sub>6</sub>, 11.0 mM aniline, 11.5 mM TFA) was found, resulting in hydrazone exchange. However, the concentrations of acid needed in these conditions are excessive and result in the hydrolysis of boronate esters (Fig. S19), showing the incompatibility of aniline catalysis with boronate esters and thus the necessity of an alternative catalyst.

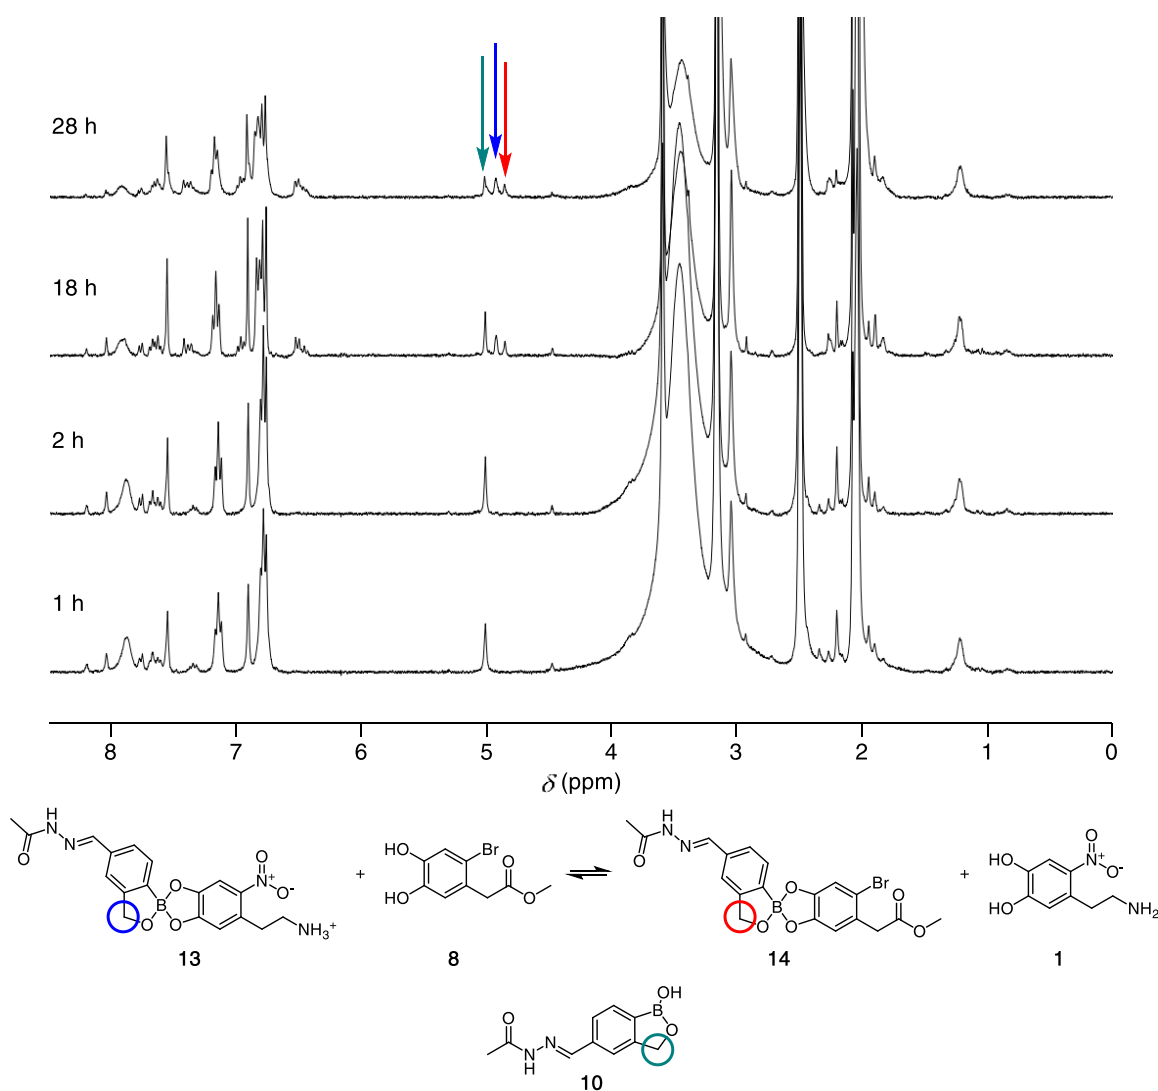

**Fig. S19.** <sup>1</sup>H NMR spectra of a mixture of **13** (20 mM) and **8** (22 mM) in condition **B\*** (DMSO-*d*<sub>6</sub>, 11.0 mM aniline, 11.5 mM TFA). After 1 h, there is complete hydrolysis of the boronate ester **13** (blue arrow) into benzoboroxole **10** (green arrow). After 18 h, the boronate esters **13** and **14** (red arrow) are seen to slowly form. This shows the incompatibility of hydrazone exchange conditions **B\*** for boronate ester **13**.

#### 4.4.2. Non-orthogonal boronate esters

To test the orthogonality of other boronate esters, boronate ester **36** was synthesized and tested with **8** in condition **B**. In these conditions, significant exchange was observed, confirming the non-orthogonal character of these exchange partners in hydrazone exchange condition **B**.

**Boronate ester 36 stock solution:** To a solution of **10** (2 mg, 10  $\mu\text{mol}$ ) in  $\text{DMSO-}d_6$  (0.45 mL), was added **5** (3 mg, 10  $\mu\text{mol}$ ) and the solution was shaken. After verifying the complete formation of **36** by  $^1\text{H}$  NMR spectroscopy, **8** (3 mg, 10  $\mu\text{mol}$ ) was added to the solution and after shaking, the solution was used for the exchange experiments.

**Boronate ester 36 in condition B:** To 0.45 mL of the boronate ester **36** stock solution in an NMR tube, was added 5.0  $\mu\text{L}$  of stock solution **B** and the mixture was shaken. After addition of 45  $\mu\text{L}$  of  $\text{DMSO-}d_6$ , the solution was subjected to  $^1\text{H}$  NMR spectroscopy to monitor the evolution of the exchange processes (Figs. S20  $\blacklozenge$ , S21).

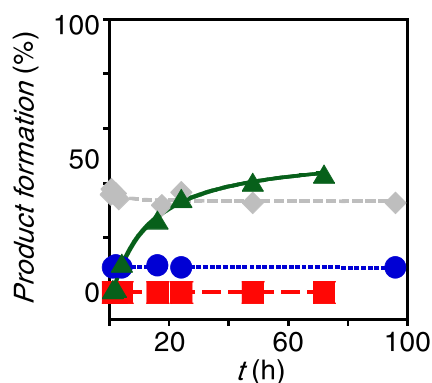

**Fig. S20.** Exchange kinetics for boronate ester **13** and **8** (●), boronate ester **36** and **8** (◆), hydrazone **15** and **16** (▲) and disulfides **20** and **21** (■) in condition **B**.

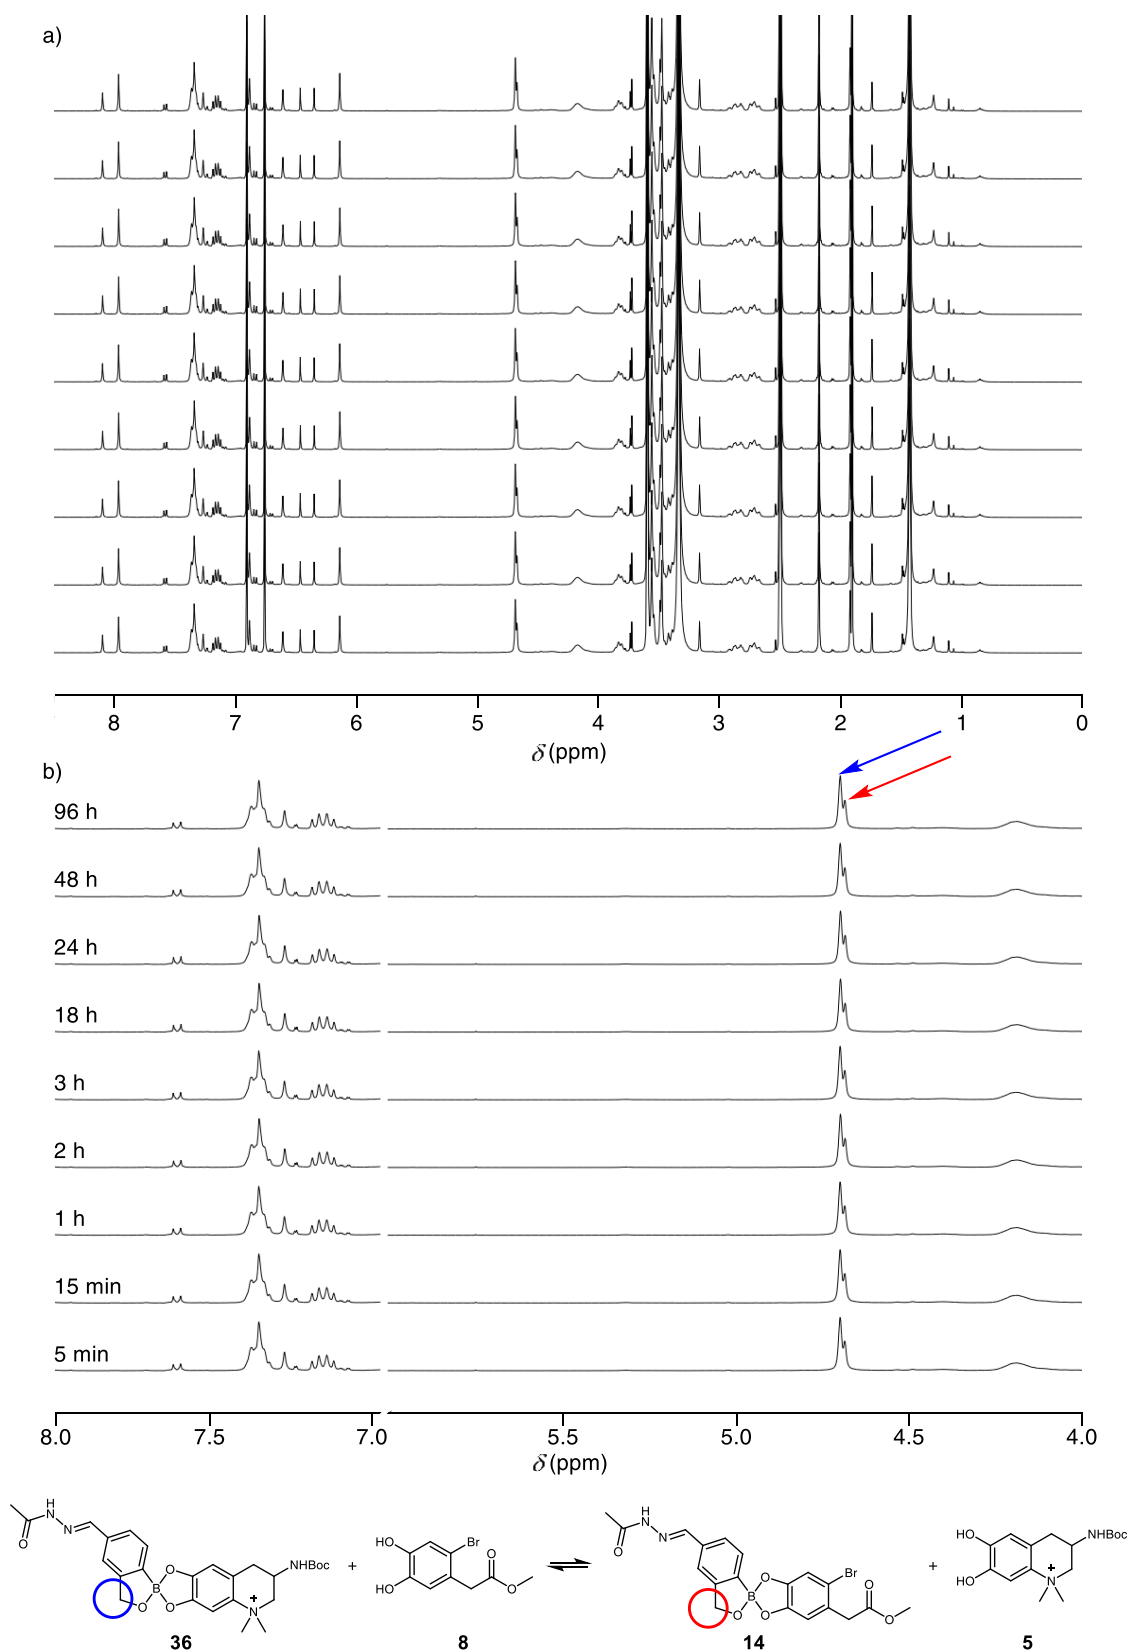

**Fig. S21.** a)  $^1\text{H}$  NMR spectra of a mixture of **36** (20 mM) and **8** (22 mM) in condition **B** ( $\text{DMSO-}d_6$ , 1.0 mM **19**, 1.5 mM TFA), b) zoom of the diagnostic peaks. A significant amount of **14** (red arrow), shows that even in mild condition **B**, **36** undergoes exchange with **8**. Contrary to **13** (Fig. S6), **36** is not orthogonal to hydrazone exchange under condition **B**.

## 5. Orthogonal dynamic covalent bonds on surfaces

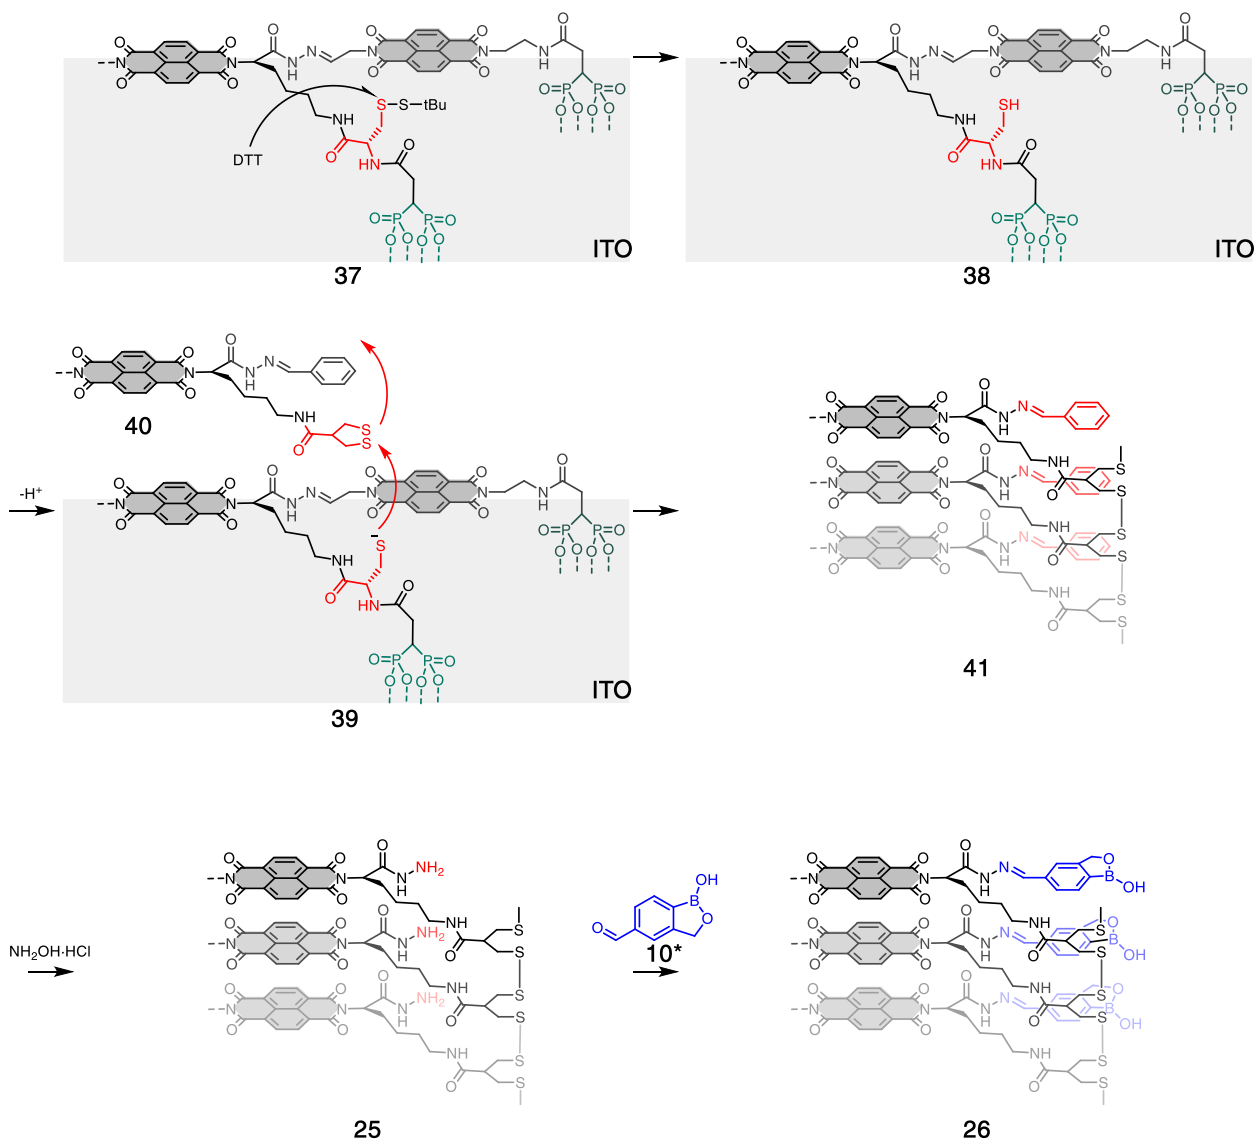

**Fig. S22.** Schematic description of the synthesis of architecture **26**. Briefly, after formation of a SAM, activation of the “initiator” **37** with DTT, results in thiol **38**. After deprotonation, thiolate **39** starts a ring-opening disulfide-exchange polymerization with the “propagator” **40** resulting in architecture **41**. Treatment with  $\text{NH}_2\text{OH}\cdot\text{HCl}$  yields architecture **25**, which then condenses with  $\mathbf{10^*}$  to yield **26**.

**Formation of architecture 24:** ITO electrodes **26** were prepared as described in ref. S1 and placed in a solution of **1** (50 mM) in DMSO with 2% DIPEA (v/v) at rt for 24 h. The resulting electrodes were quickly rinsed with EtOH and dried under a flow of air.

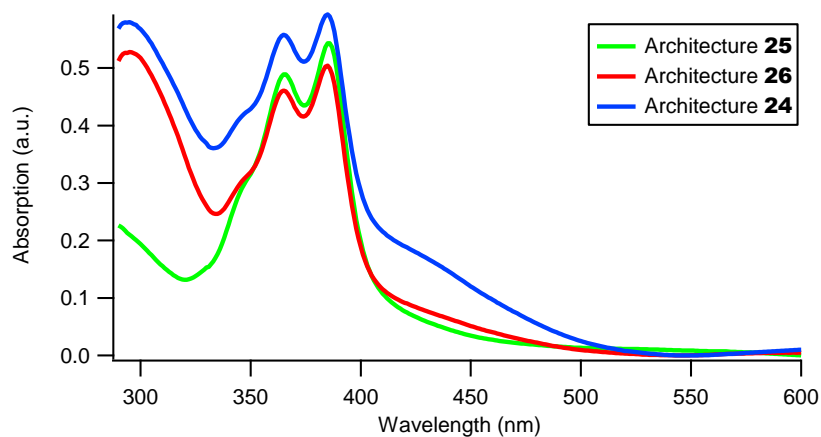

**Fig. S23.** UV-Vis spectra of architectures **25** (green, after treatment with  $\text{NH}_2\text{OH}$  for 24 h at 40 °C), **26** (red, after treatment with a solution of **41** for 24 h at rt) and **24** (blue, after treatment with a solution of **1** for 24 h at rt).

To determine TSA yield  $\eta$ , the following extinction coefficients were used: <sup>S1</sup>

$$\mathbf{10}: \epsilon_{311} = 14.3 \text{ mM}^{-1}\text{cm}^{-1}$$

$$\mathbf{13}: \epsilon_{423} = 5.5 \text{ mM}^{-1}\text{cm}^{-1}$$

TSA yield  $\eta$  was calculated as follows:

$$\begin{aligned} \eta &= [\Delta A_{423} (\mathbf{26} \rightarrow \mathbf{24}) / \epsilon_{423}(\mathbf{13})] / [\Delta A_{311} (\mathbf{25} \rightarrow \mathbf{26}) / \epsilon_{311}(\mathbf{10})] \\ &= [0.097/5.5] / [0.287/14.3] \\ &= 0.88 \end{aligned}$$

**Hydrazone exchange on surfaces:** 5 electrodes **24** were immersed in 0.1 mL each of a solution of **16** (20 mM), **19** (1.0 mM) and TFA (1.5 mM) in DMSO-*d*<sub>6</sub> for 7 h at 40 °C. Afterwards, 5 more electrodes **24** were immersed in the same solutions for 7 h at 40 °C. Each solution was used twice to increase the concentration of exchange product in solution. The solutions were combined in an NMR tube and subjected to <sup>1</sup>H NMR spectroscopy.

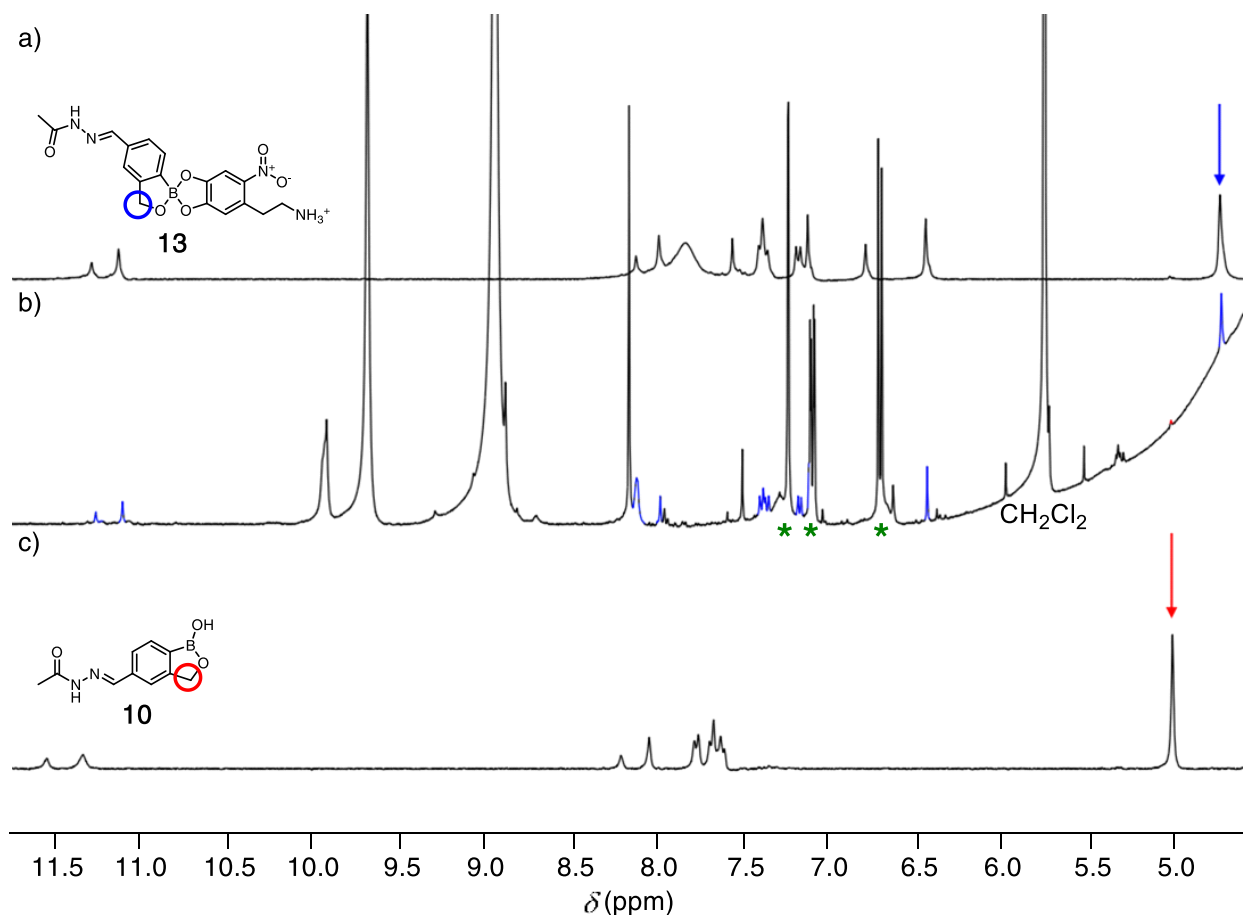

**Fig. S24.** <sup>1</sup>H NMR spectra of a) boronate ester **13** in DMSO-*d*<sub>6</sub>, b) a solution of **19** (1.0 mM) and TFA (1.5 mM) in DMSO-*d*<sub>6</sub> (condition **B**) after utilization for hydrazone exchange on SOSIP-TSE architecture **24** and c) boronic acid **10** (hydrolysis product) in DMSO-*d*<sub>6</sub>. The raising baseline of b) is due to the peak of water. Peaks assigned to **19** are marked with a green asterisk.

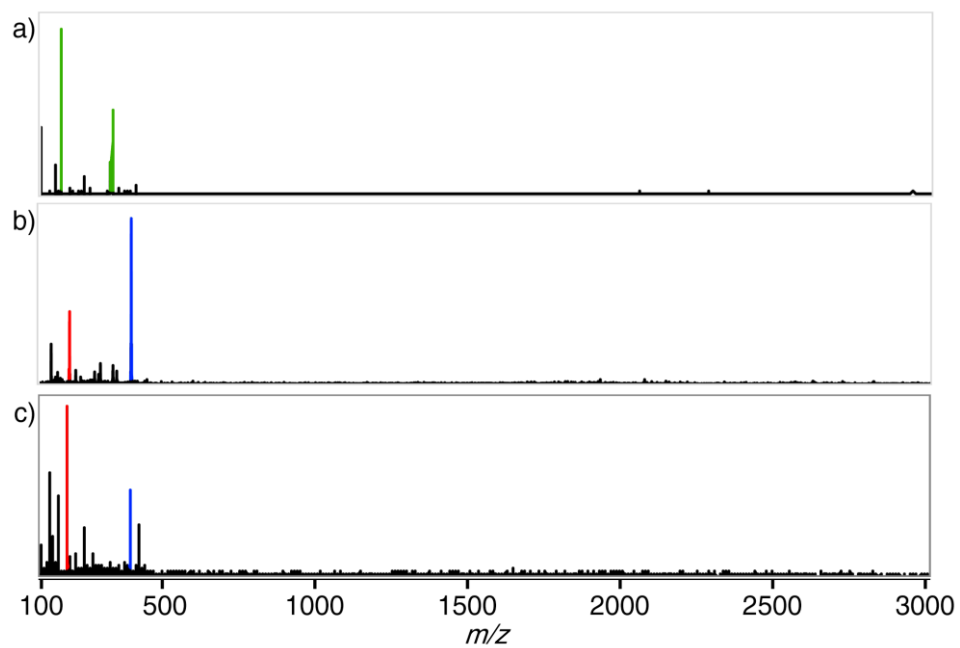

**Fig. S25.** Full range of ESI-MS (negative mode) of a) catalyst **19** ( $m/z$  166 ( $[M-H]^-$ ), 333 ( $[2M-H]^-$ )), b) **13** ( $m/z$  397 ( $[M-H]^-$ )) and catechol **1** ( $m/z$  197 ( $[M-H]^-$ )), and c) the solution obtained from incubation of multicomponent surface architecture **24** with hydrazide **16** and 1.0 mM catalyst **19** in DMSO- $d_6$ , 1.5 mM TFA, for 7 h at 40 °C (**10**:  $m/z$  217 ( $[M-H]^-$ )).

## 6. Supporting references

- S1. K.-D. Zhang and S. Matile, *Angew. Chem. Int. Ed.*, 2015, **54**, 8980–8983.
- S2. D. Larsen, M. Pittelkow, S. Karmakar and E. T. Kool, *Org. Lett.*, 2015, **17**, 274–277.
- S3. R. Berger, P. M. A. Rabbat and J. L. Leighton, *J. Am. Chem. Soc.*, 2003, **125**, 9596–9597.
- S4. B. Malisova, S. Tosatti, M. Textor, K. Gademann and S. Zürcher, *Langmuir*, 2010, **26**, 4018–4026.
- S5. K. Gademann, *ChemBioChem*, 2005, **6**, 913–919.
- S6. B. Geiseler and L. Fruk, *J. Mater. Chem.*, 2012, **22**, 735–741.
- S7. W. S. Li, D. L. Jiang, Y. Suna and T. Aida, *J. Am. Chem. Soc.*, 2005, **127**, 7700–7702.



## 7. NMR spectra

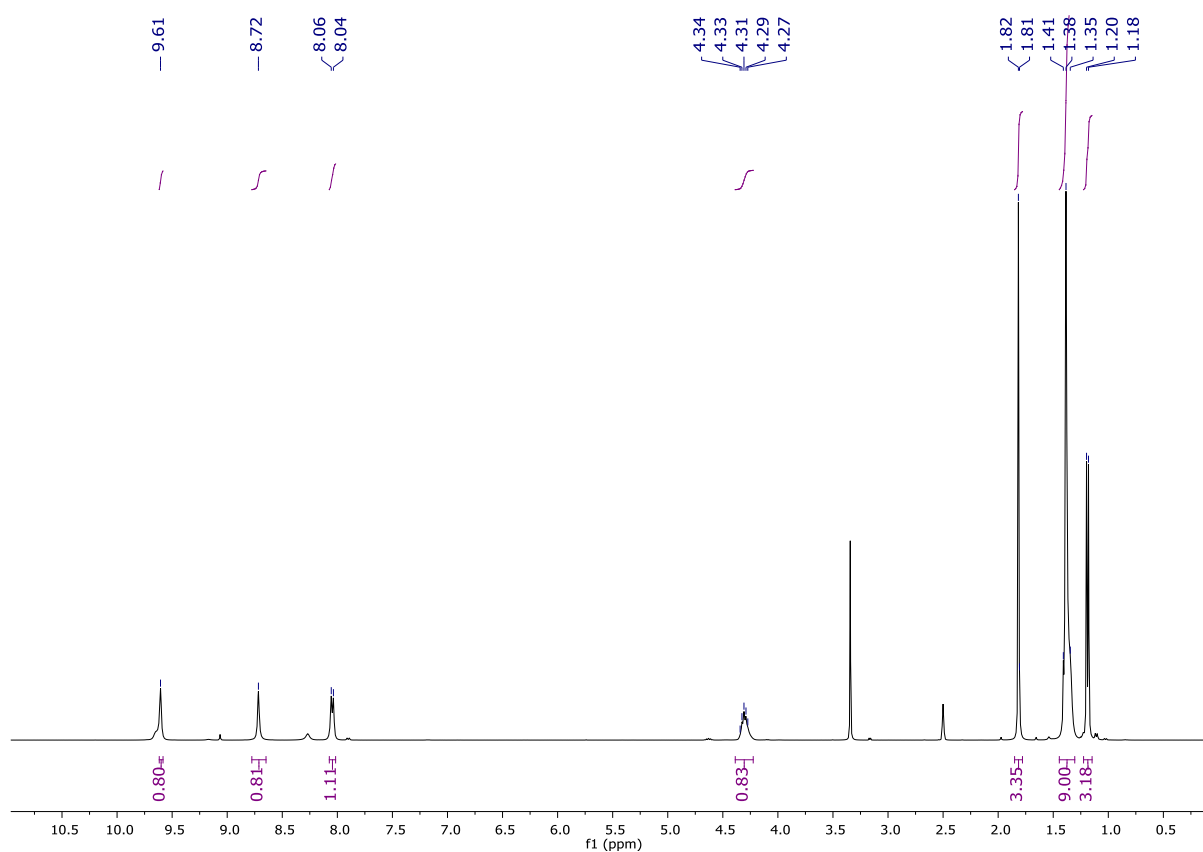

**Fig. S26.**  $^1\text{H}$  NMR spectrum of **29** in  $\text{DMSO-}d_6$ .

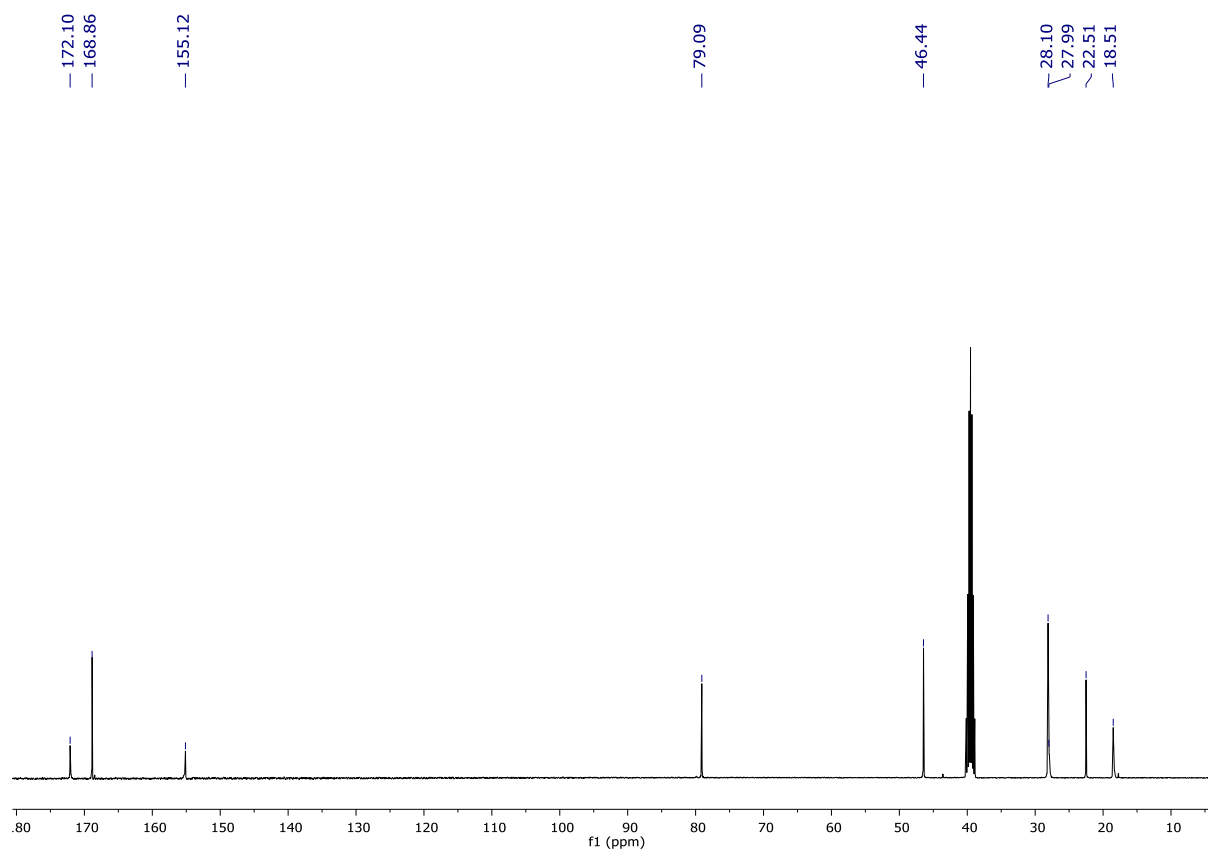

**Fig. S27.**  $^{13}\text{C}$  NMR spectrum of **29** in  $\text{DMSO-}d_6$ .

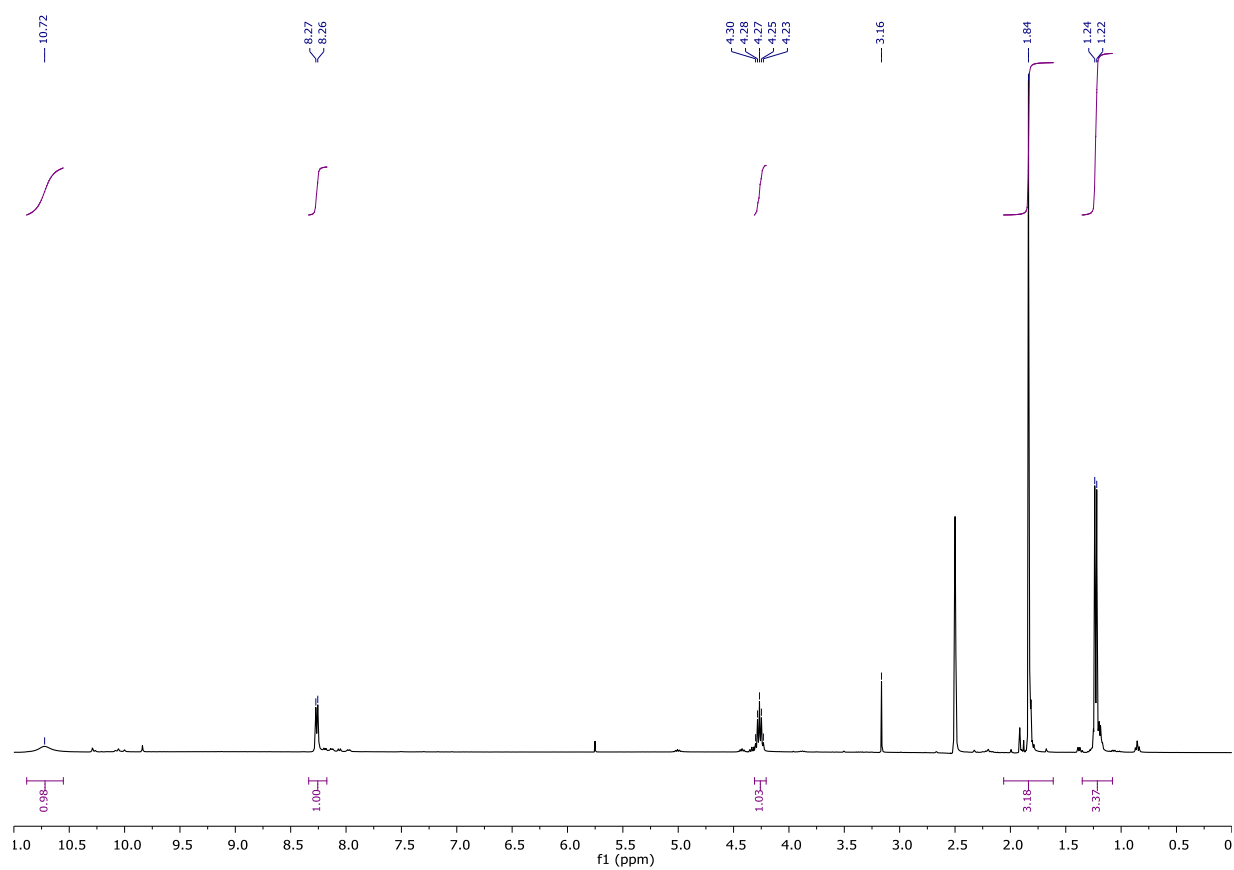

**Fig. S28.**  $^1\text{H}$  NMR spectrum of **18** in  $\text{DMSO-}d_6$ .

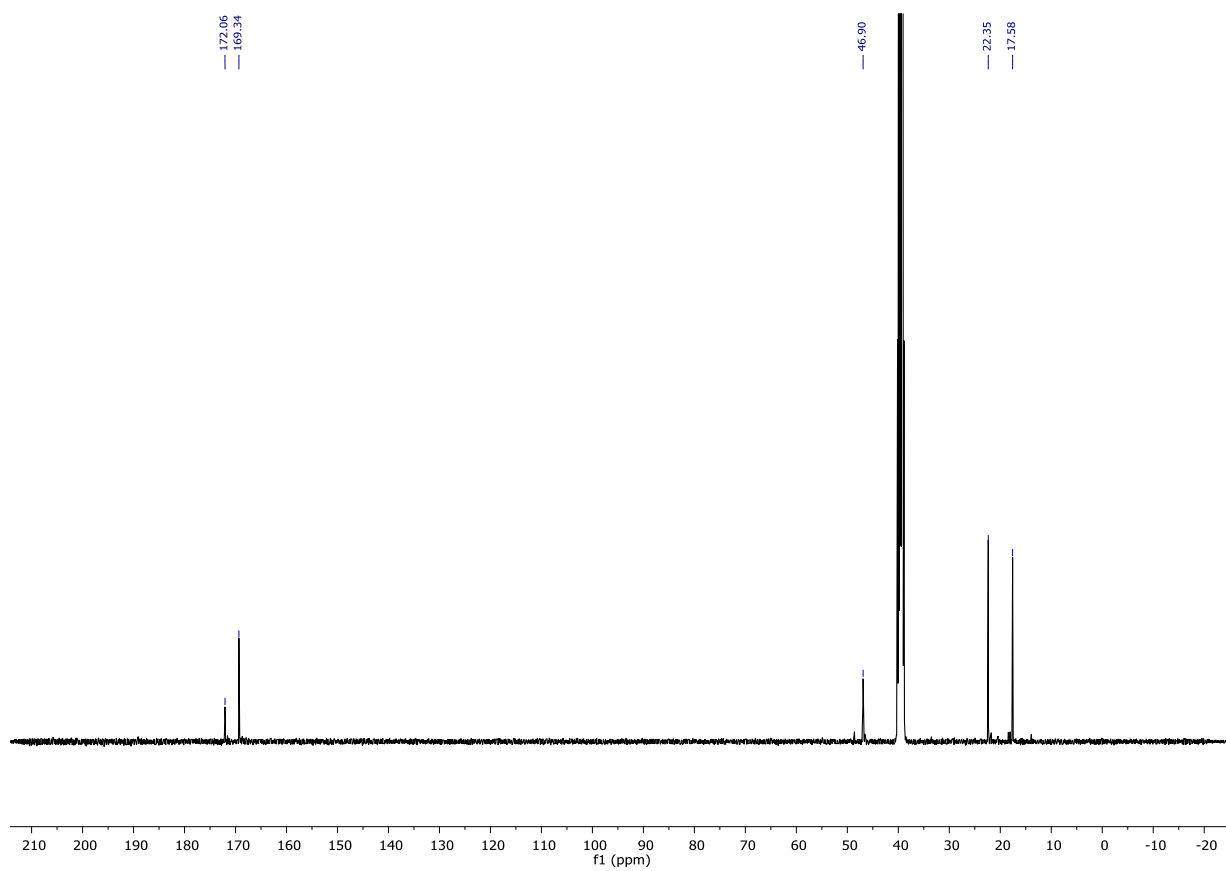

**Fig. S29.**  $^{13}\text{C}$  NMR spectrum of **18** in  $\text{DMSO-}d_6$ .

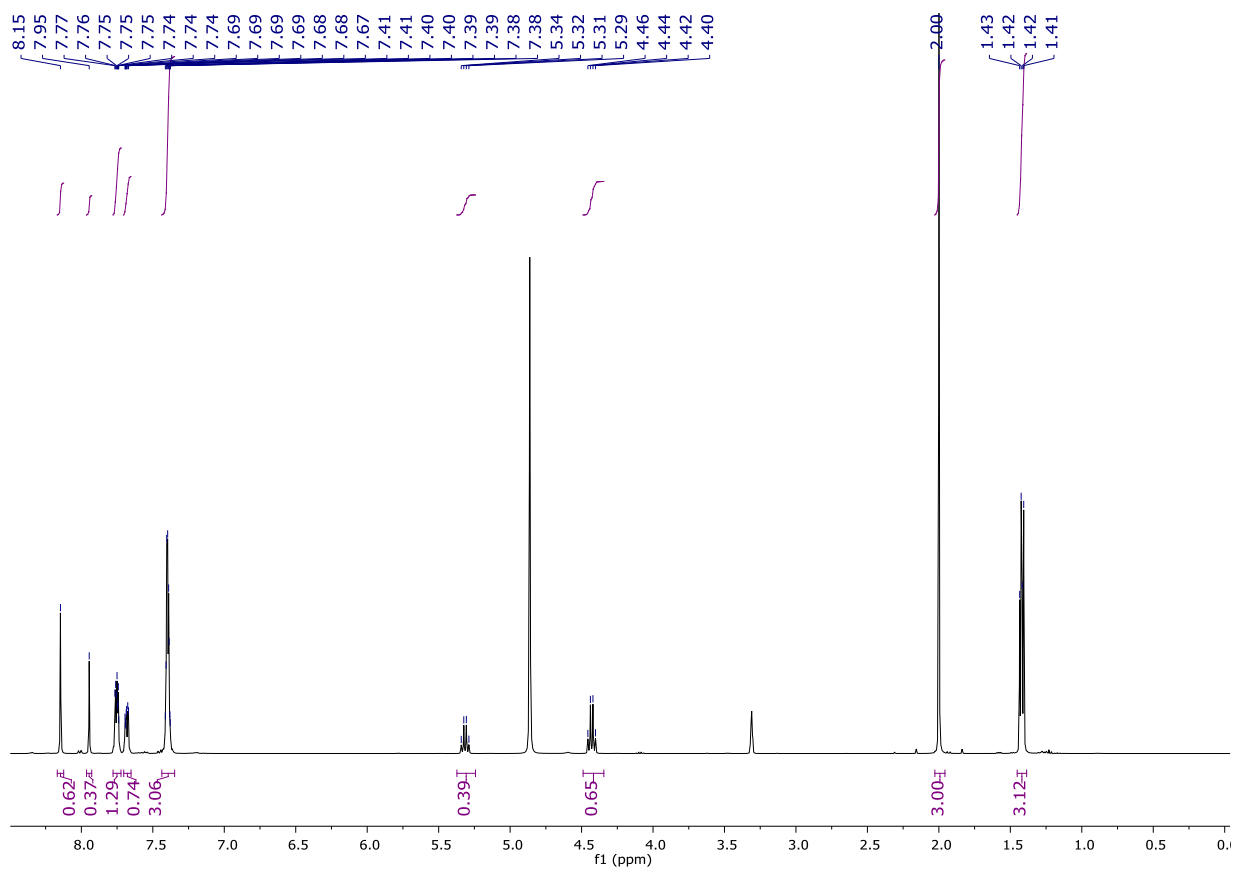

**Fig. S30.**  $^1\text{H}$  NMR spectrum of **15** in  $\text{CD}_3\text{OD}$ .

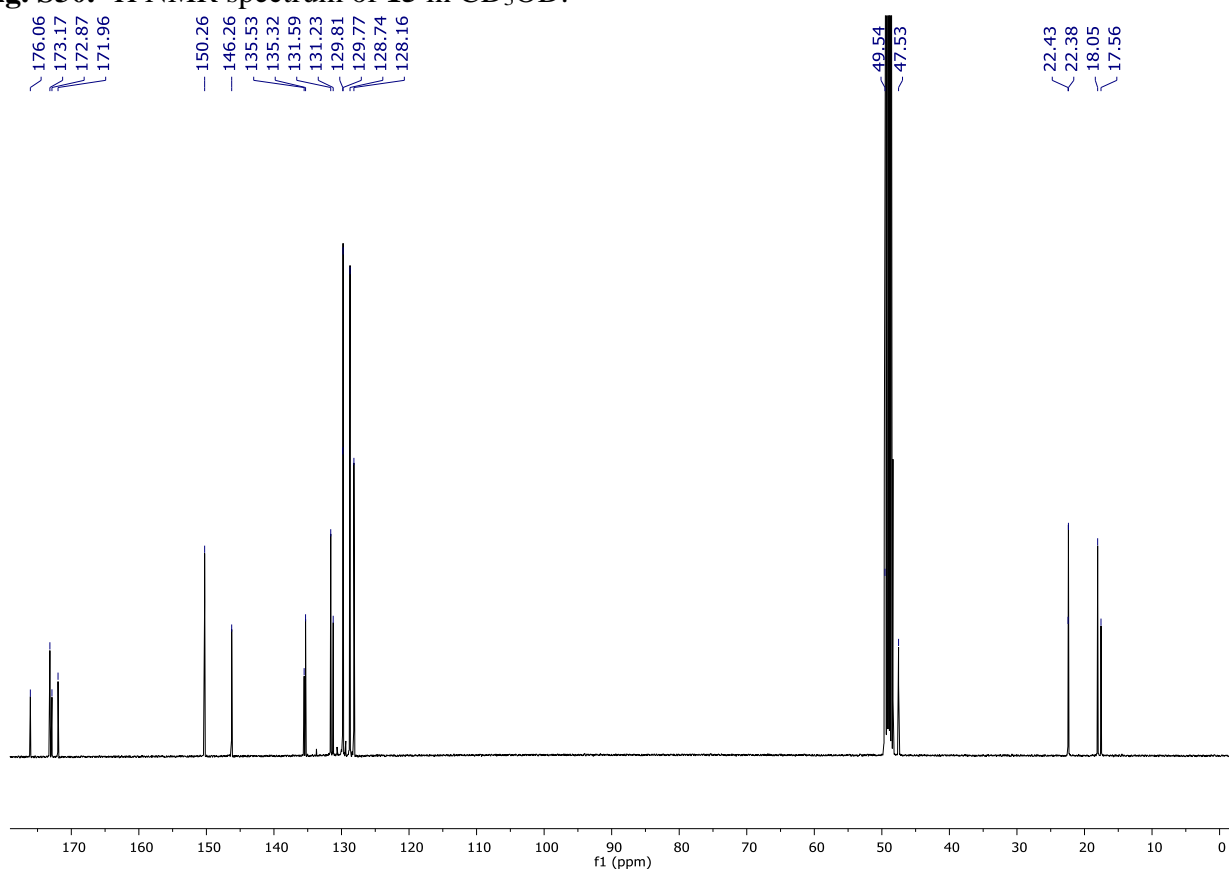

**Fig. S31.**  $^{13}\text{C}$  NMR spectrum of **15** in  $\text{CD}_3\text{OD}$ .

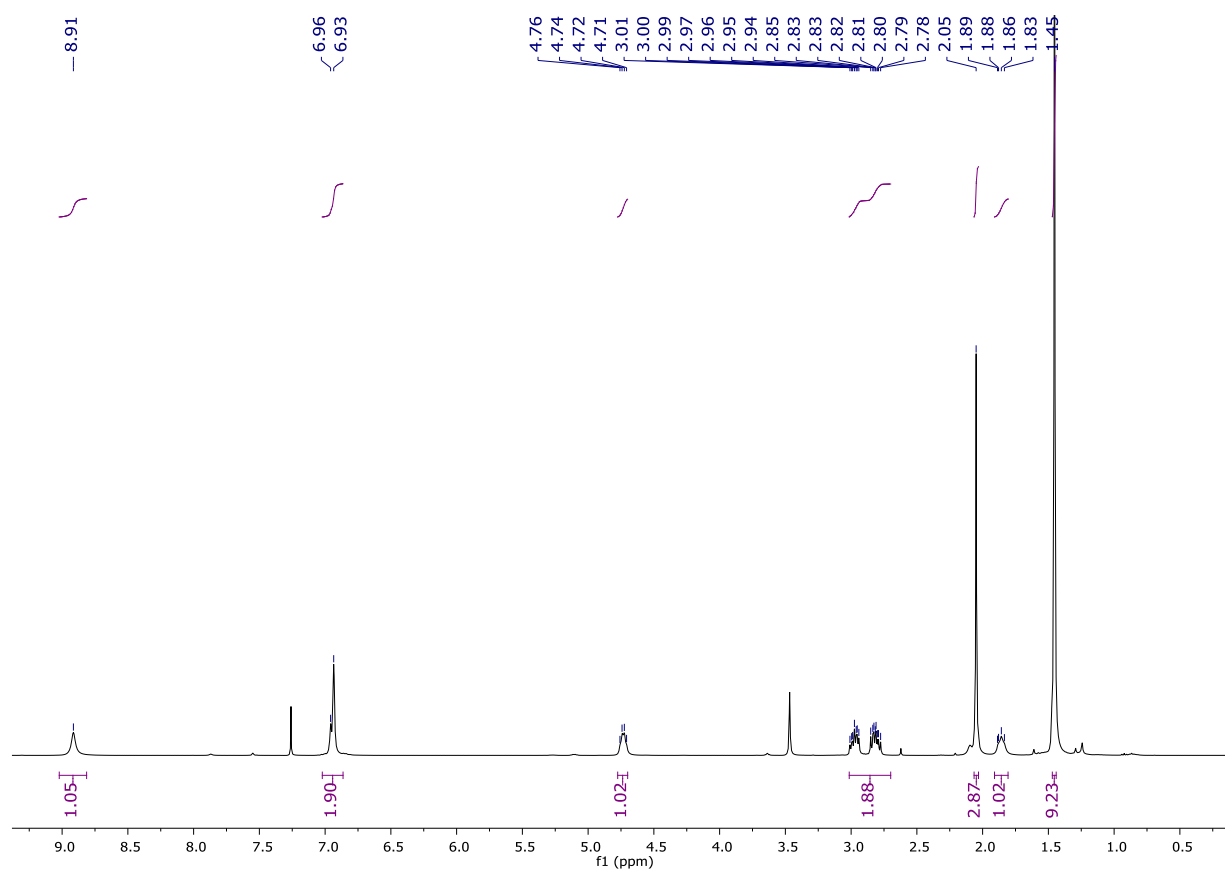

**Fig. S32.**  $^1\text{H}$  NMR spectrum of **31** in  $\text{CDCl}_3$ .

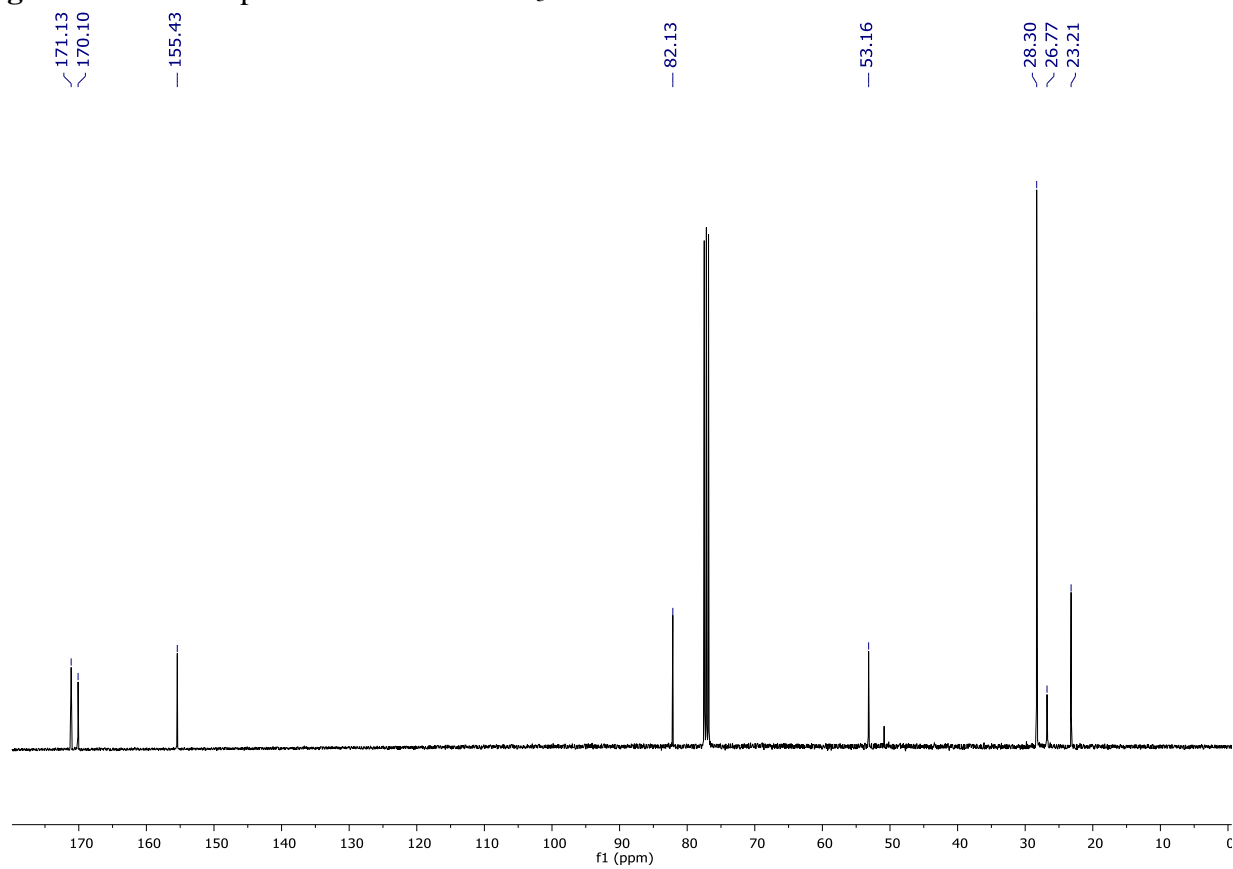

**Fig. S33.**  $^{13}\text{C}$  NMR spectrum of **31** in  $\text{CDCl}_3$ .

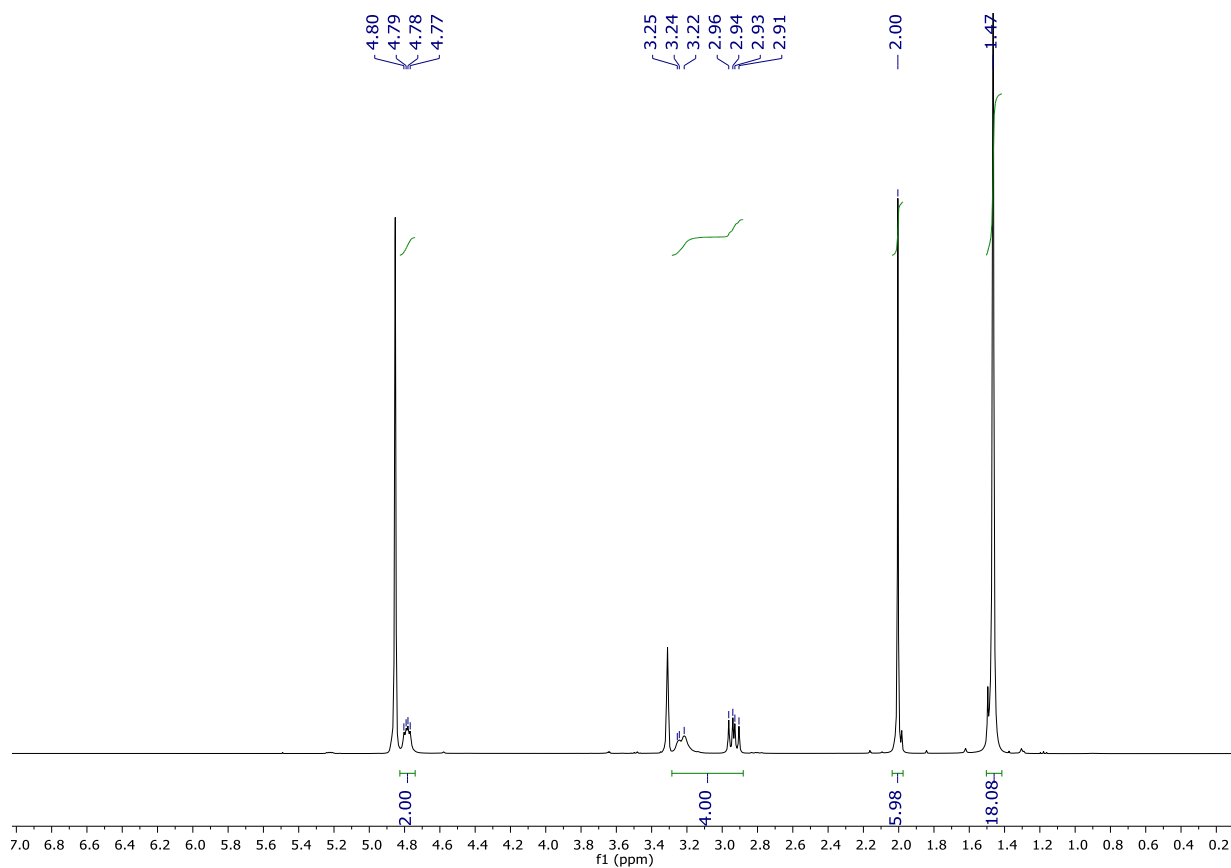

**Fig. S34.**  $^1\text{H}$  NMR spectrum of **20** in  $\text{CD}_3\text{OD}$ .

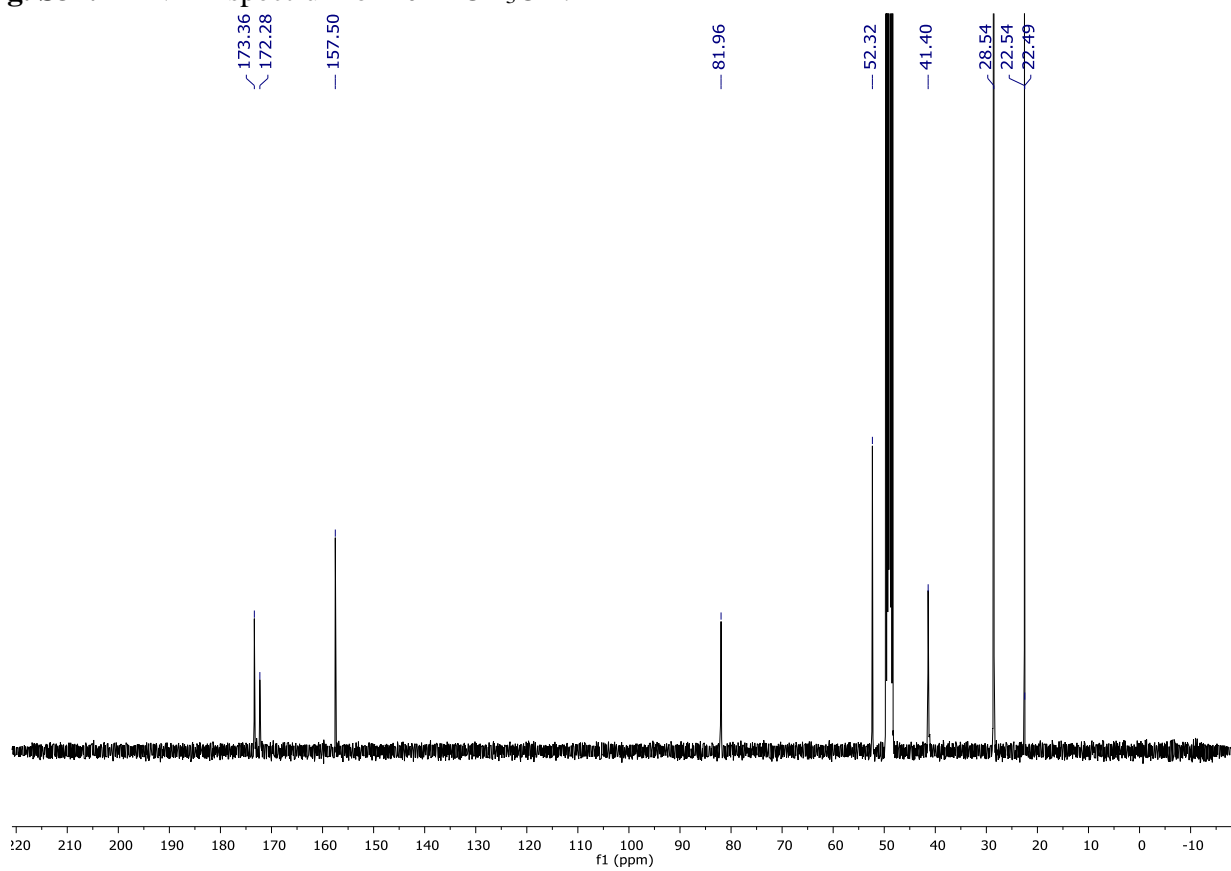

**Fig. S35.**  $^{13}\text{C}$  NMR spectrum of **20** in  $\text{CD}_3\text{OD}$ .

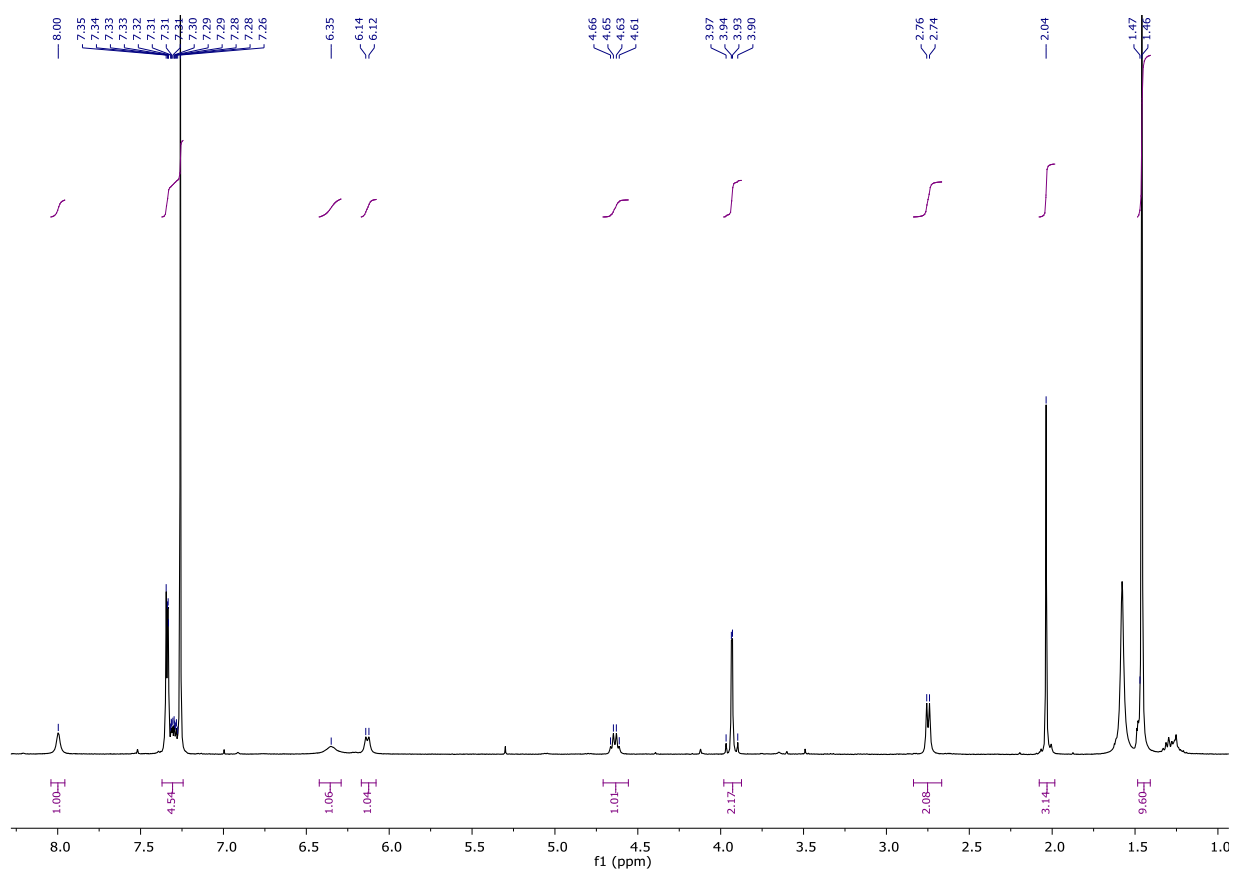

Fig. S36.  $^1\text{H}$  NMR spectrum of **22** in  $\text{CDCl}_3$ .

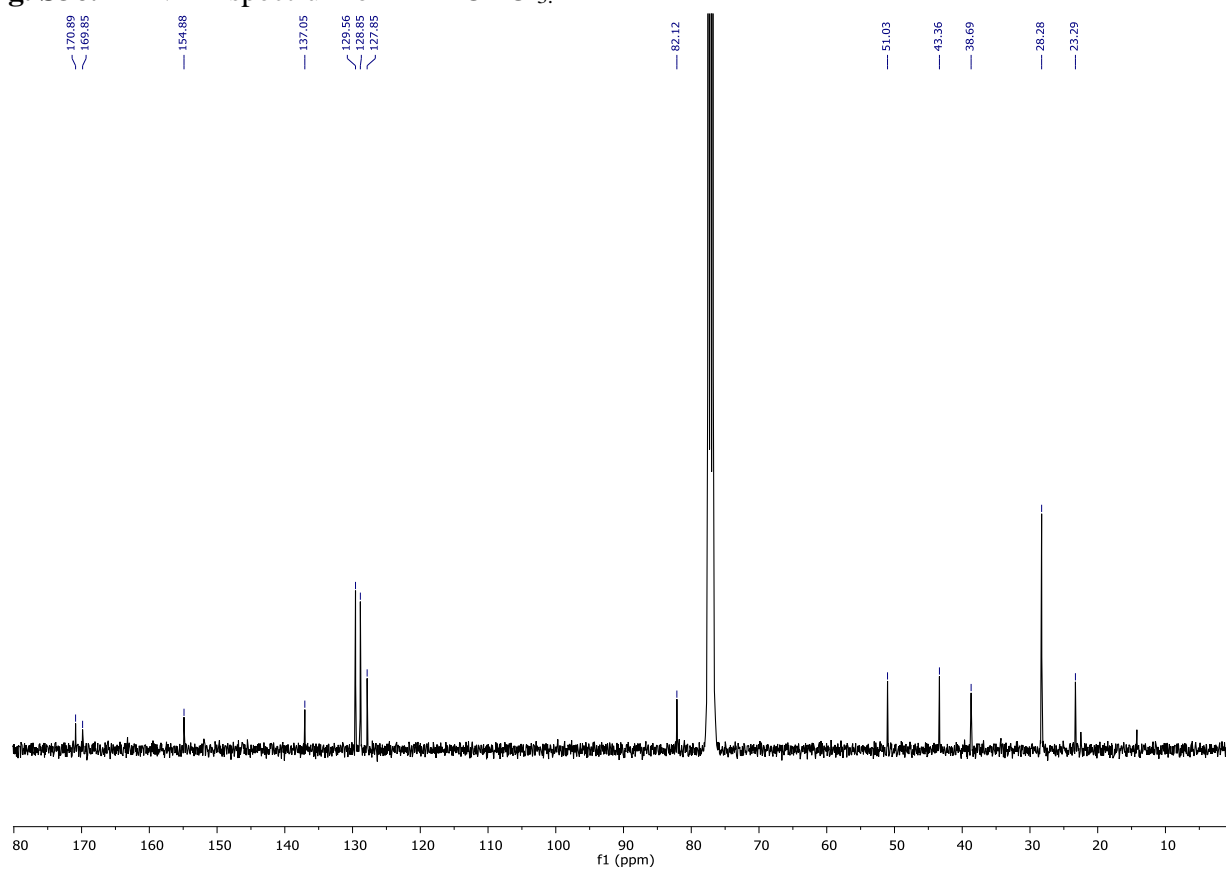

Fig. S37.  $^{13}\text{C}$  NMR spectrum of **22** in  $\text{CDCl}_3$ .

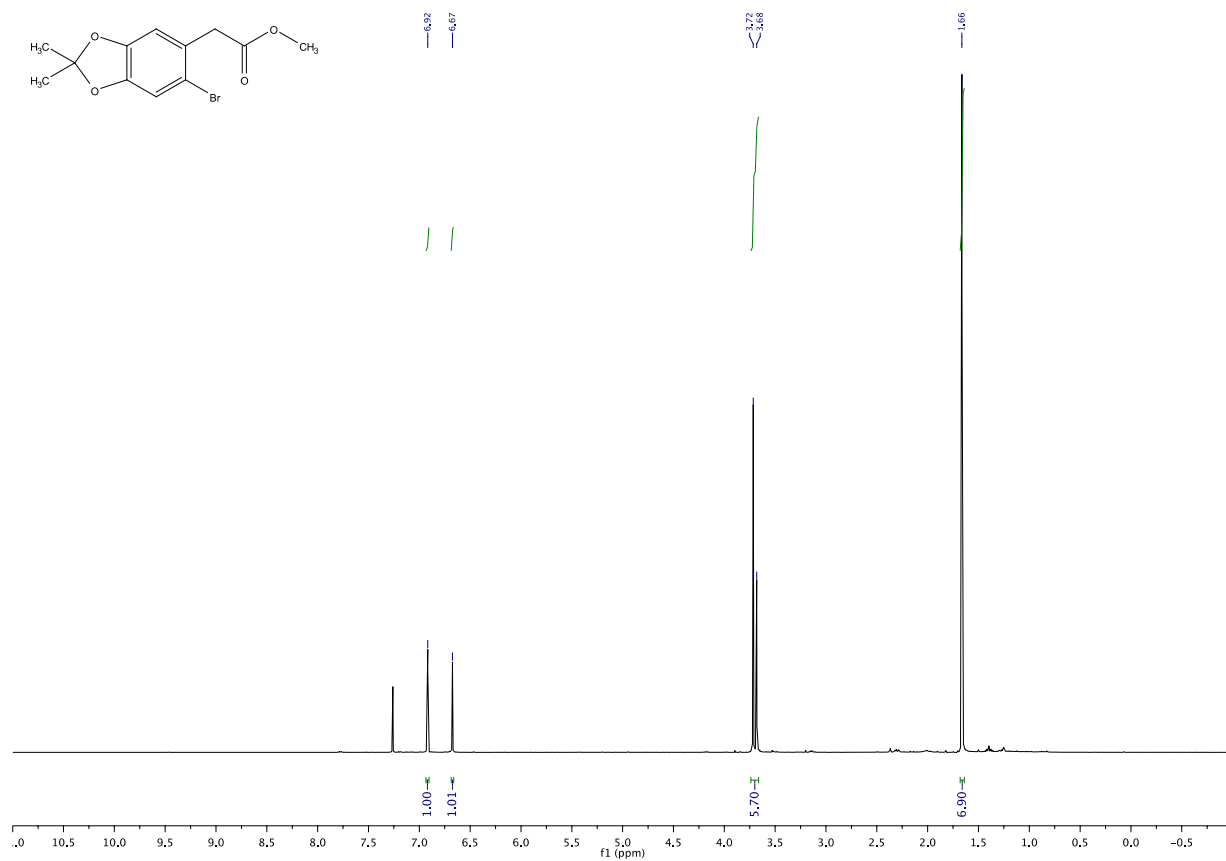

Fig. S38. <sup>1</sup>H NMR spectrum of **32** in CDCl<sub>3</sub>.

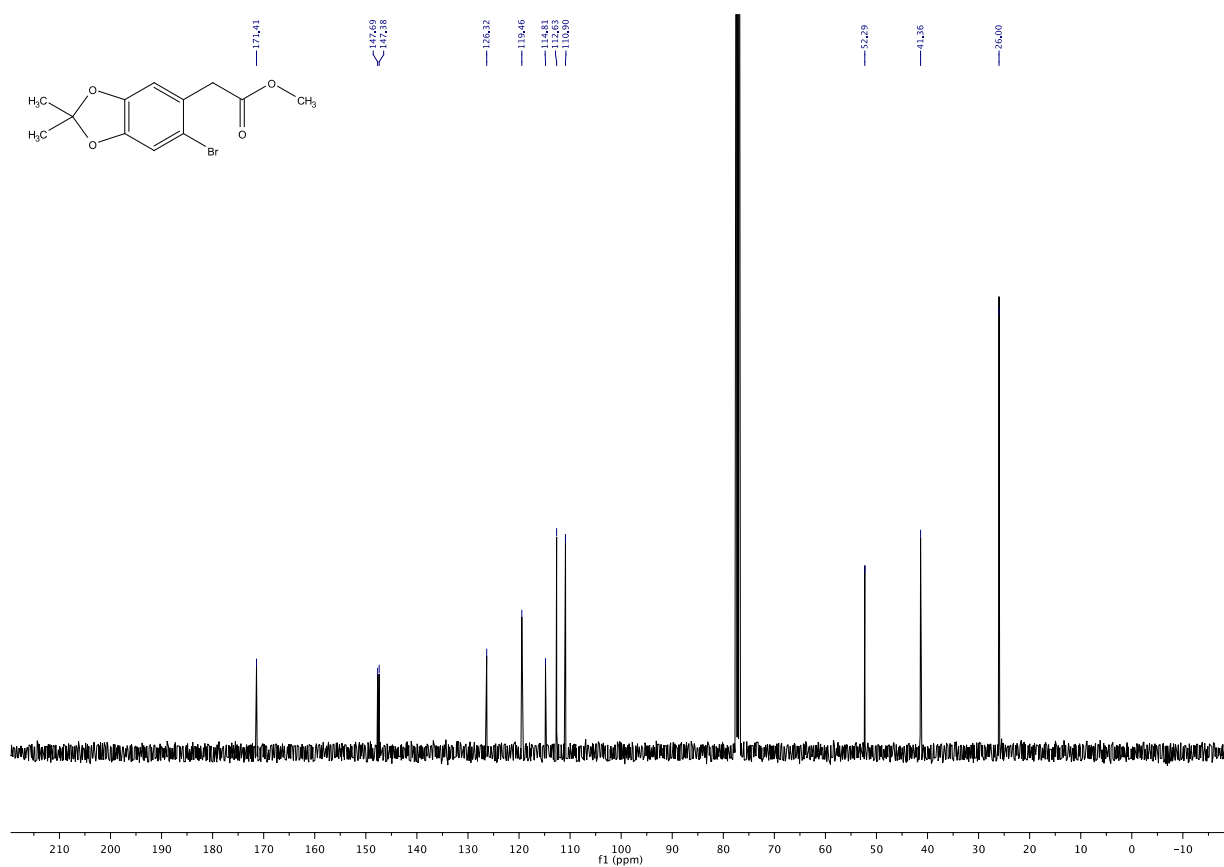

Fig. S39. <sup>13</sup>C NMR spectrum of **32** in CDCl<sub>3</sub>.

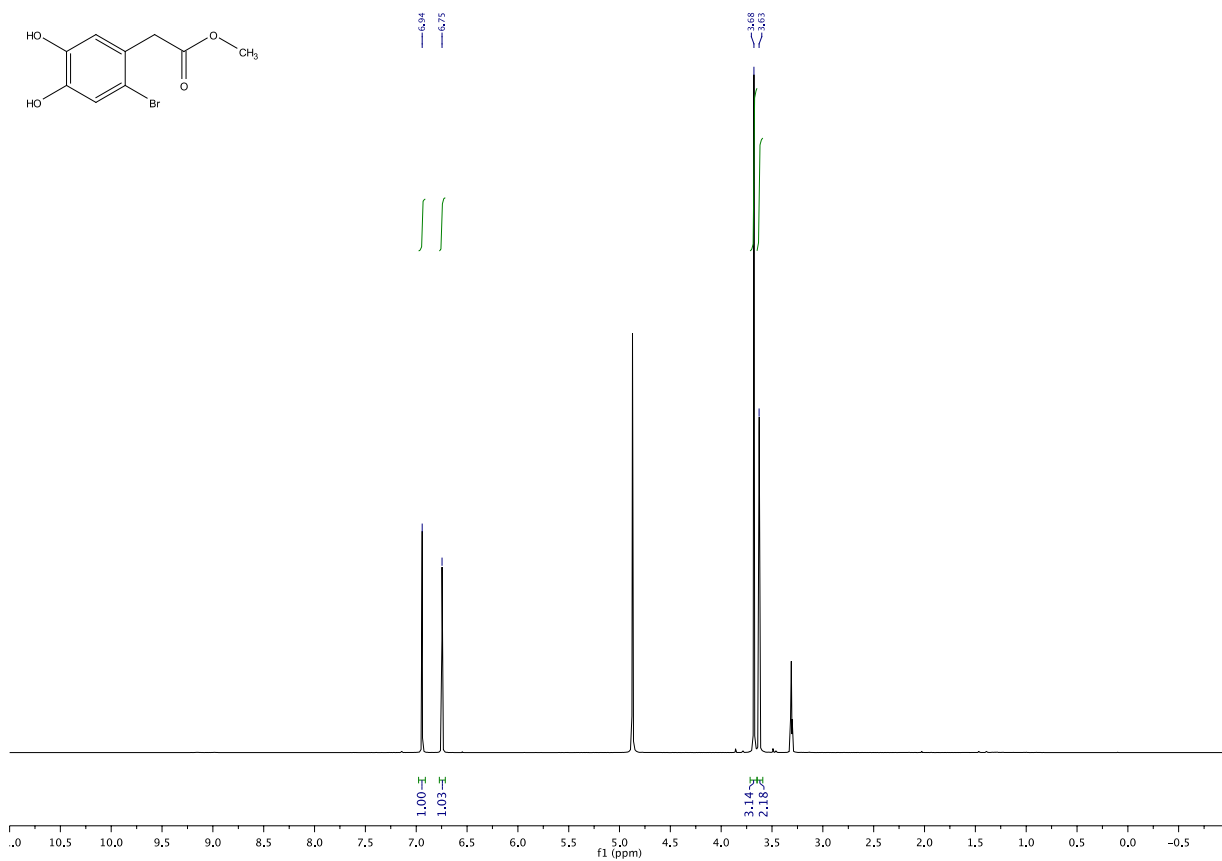

Fig. S40.  $^1\text{H}$  NMR spectrum of **8** in  $\text{CD}_3\text{OD}$ .

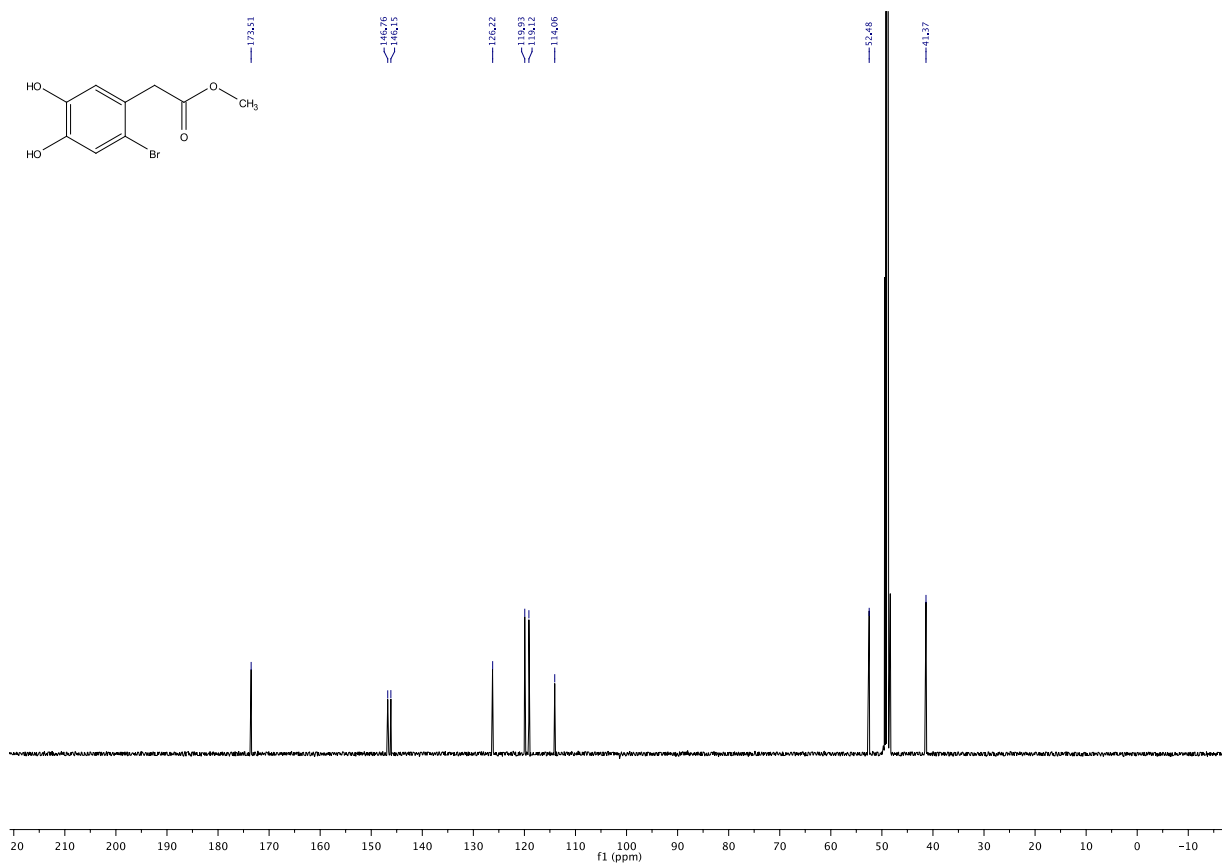

Fig. S41.  $^{13}\text{C}$  NMR spectrum of **8** in  $\text{CD}_3\text{OD}$ .



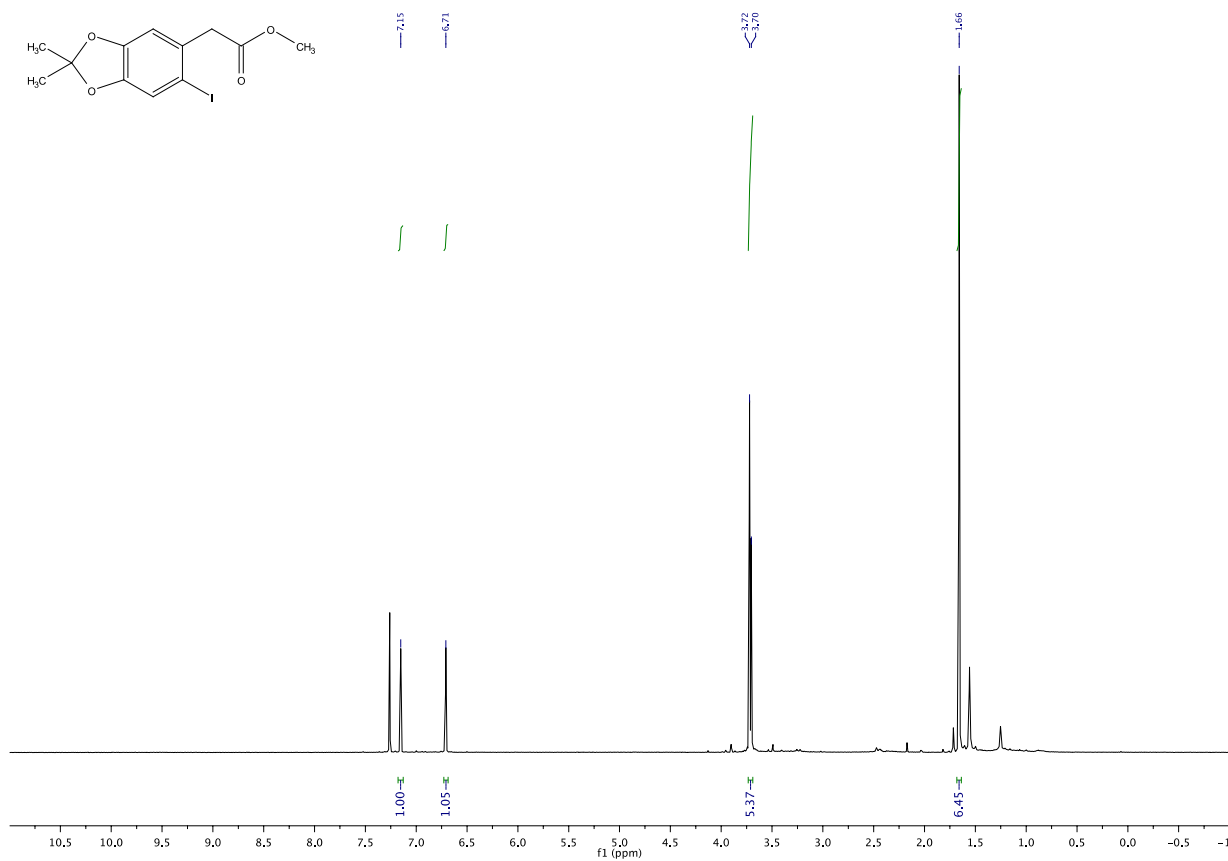

Fig. S42. <sup>1</sup>H NMR spectrum of **33** in CDCl<sub>3</sub>.

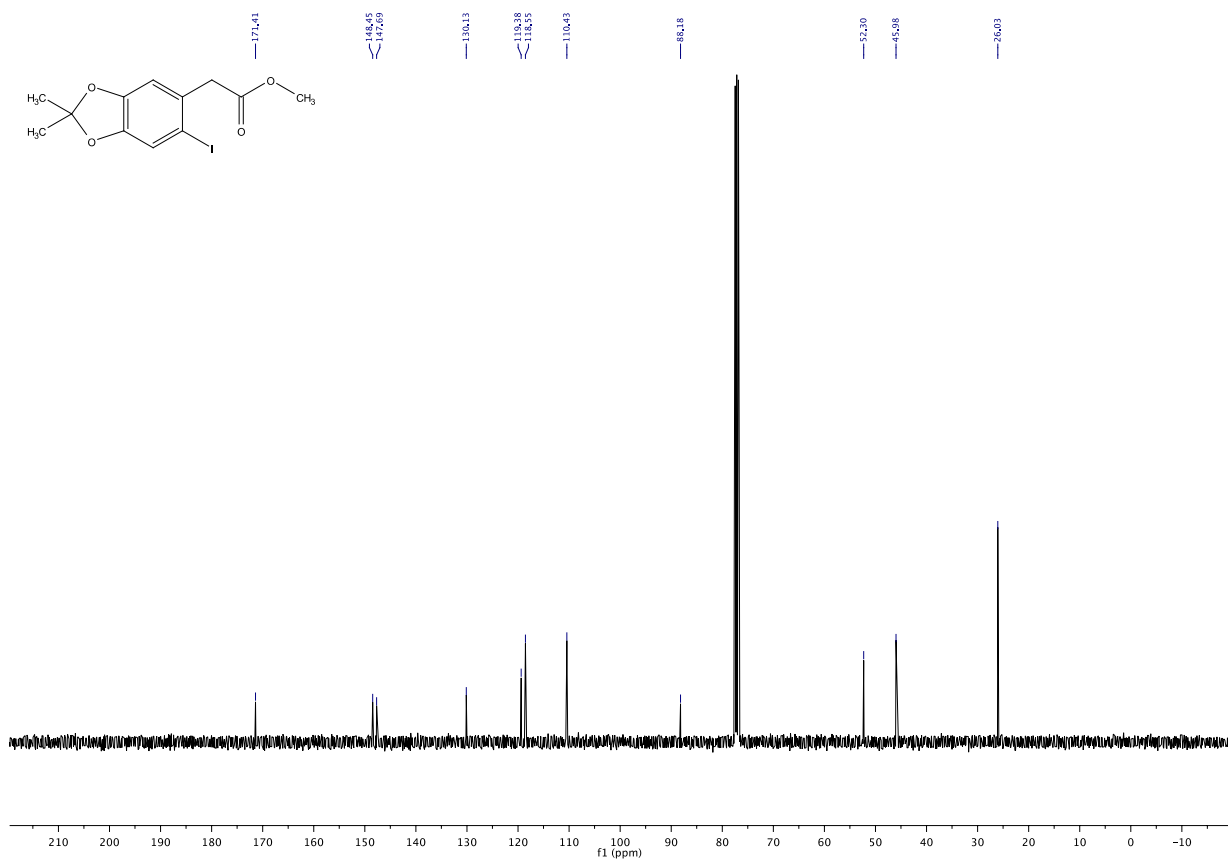

Fig. S43. <sup>13</sup>C NMR spectrum of **33** in CDCl<sub>3</sub>.

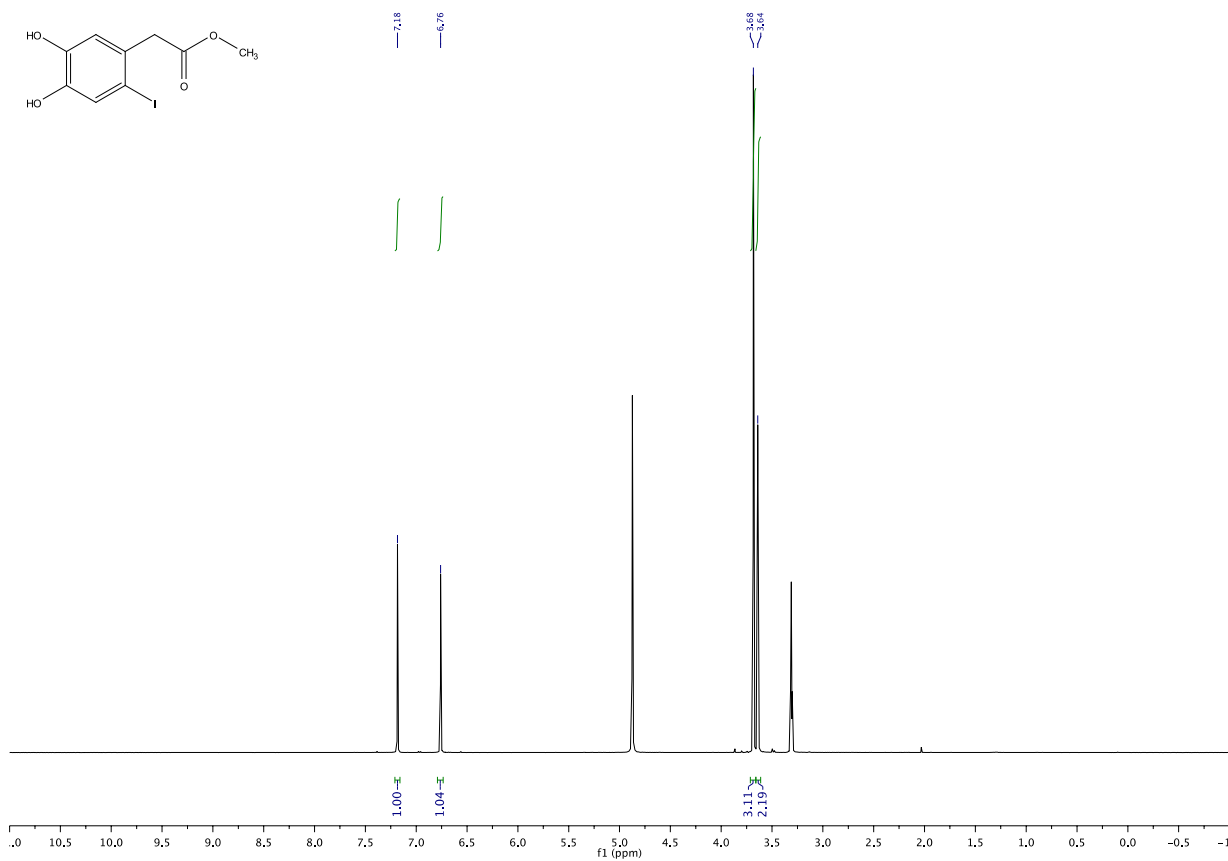

Fig. S44. <sup>1</sup>H NMR spectrum of **9** in CD<sub>3</sub>OD.

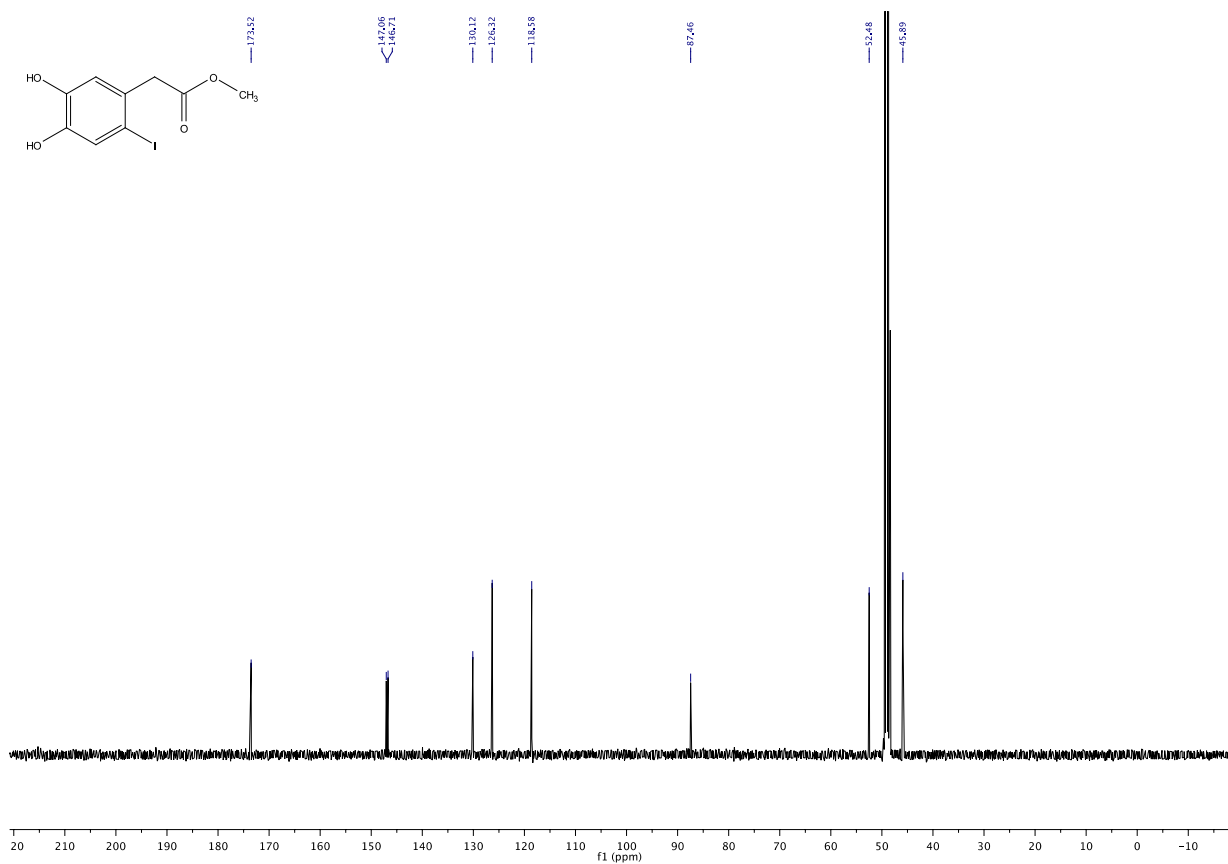

Fig. S45. <sup>13</sup>C NMR spectrum of **9** in CD<sub>3</sub>OD.

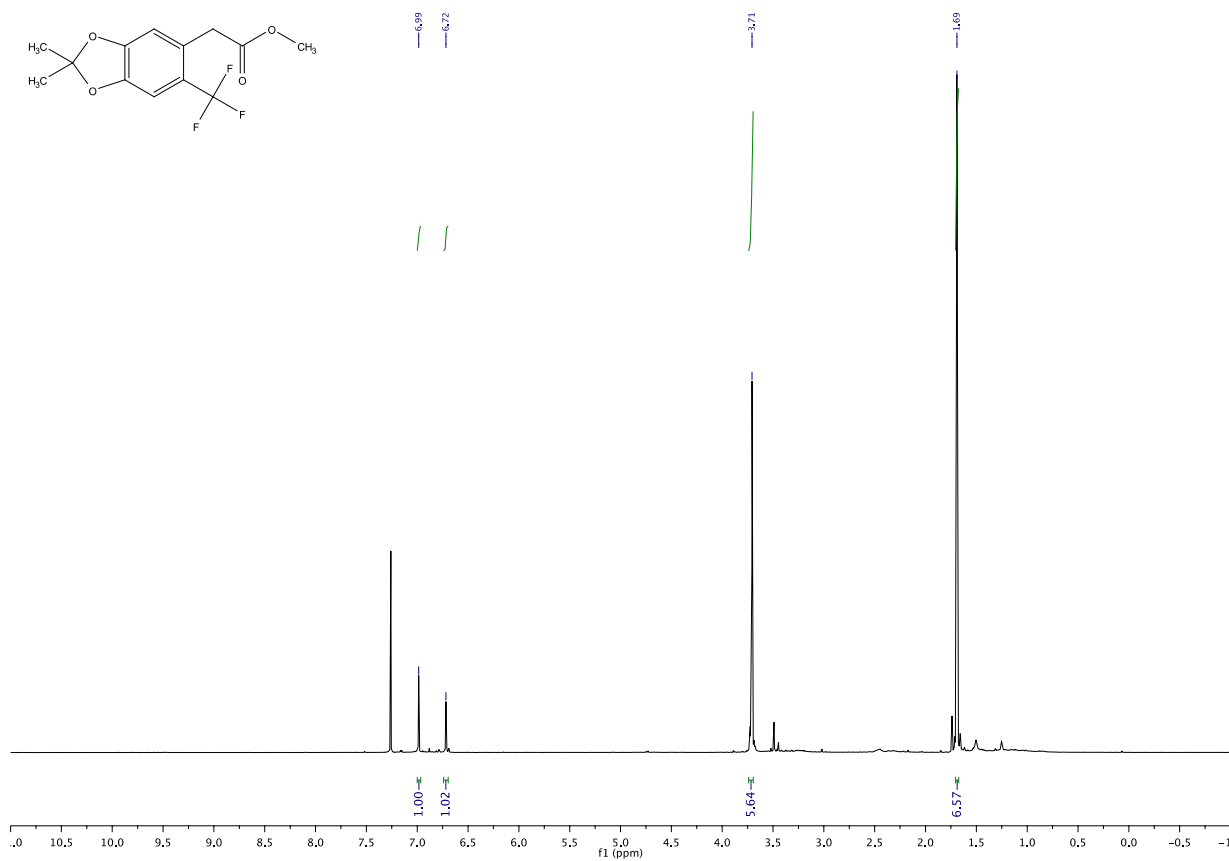

Fig. S46. <sup>1</sup>H NMR spectrum of **34** in CDCl<sub>3</sub>.

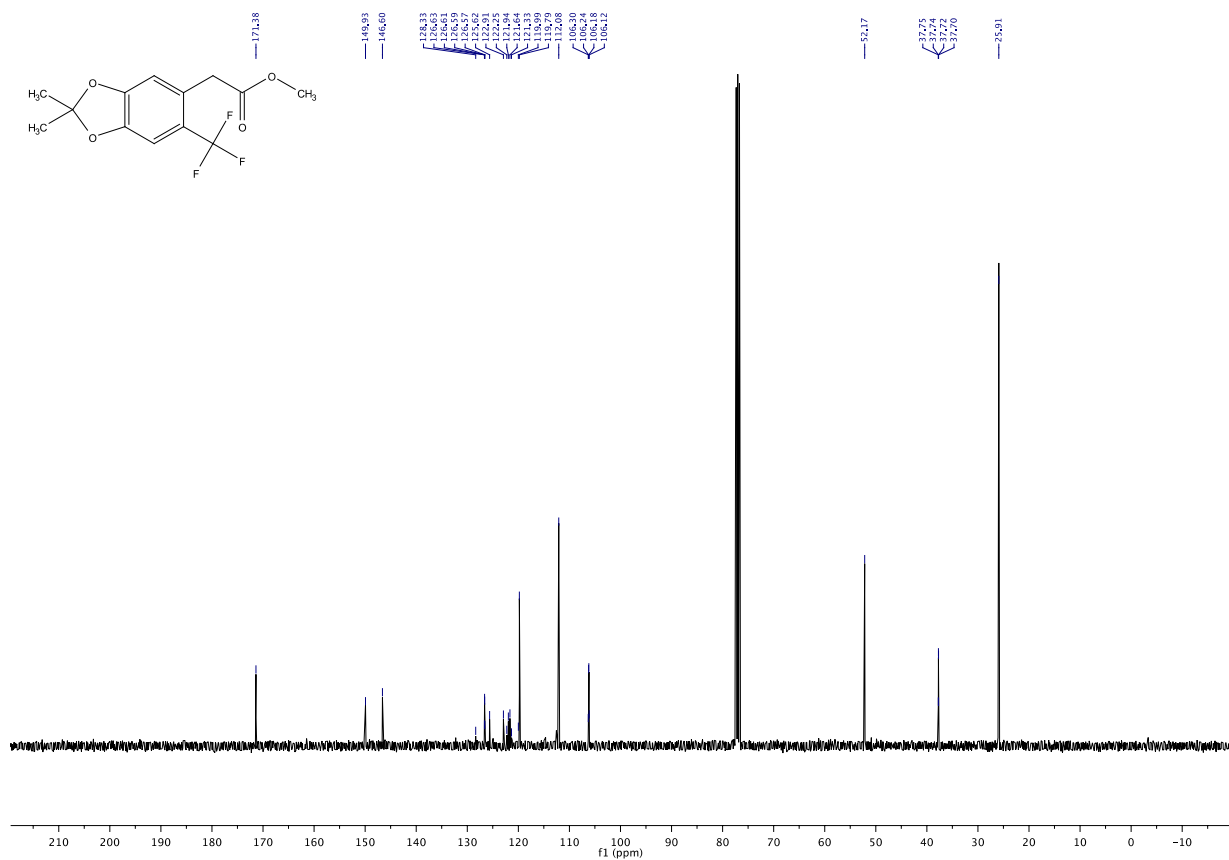

Fig. S47. <sup>13</sup>C NMR spectrum of **34** in CDCl<sub>3</sub>.

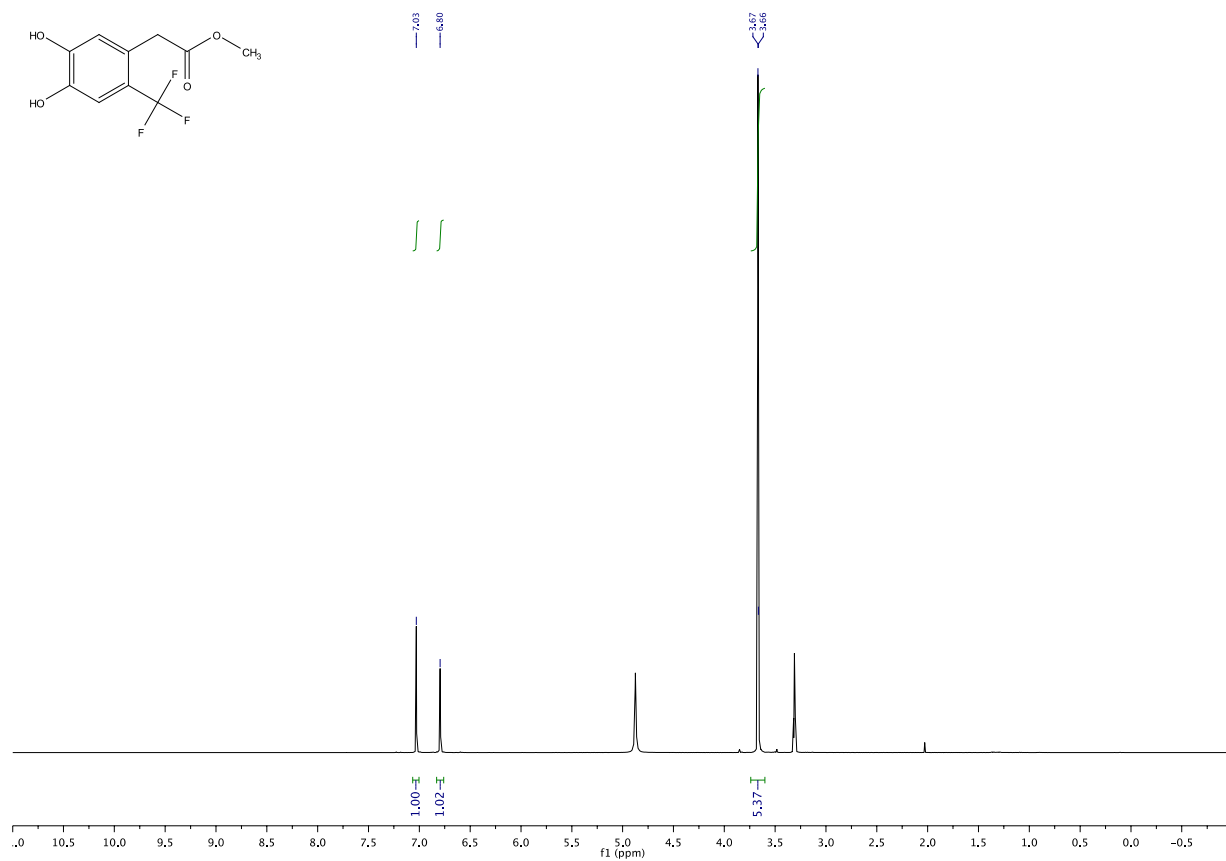

**Fig. S48.** <sup>1</sup>H NMR spectrum of **7** in CD<sub>3</sub>OD.

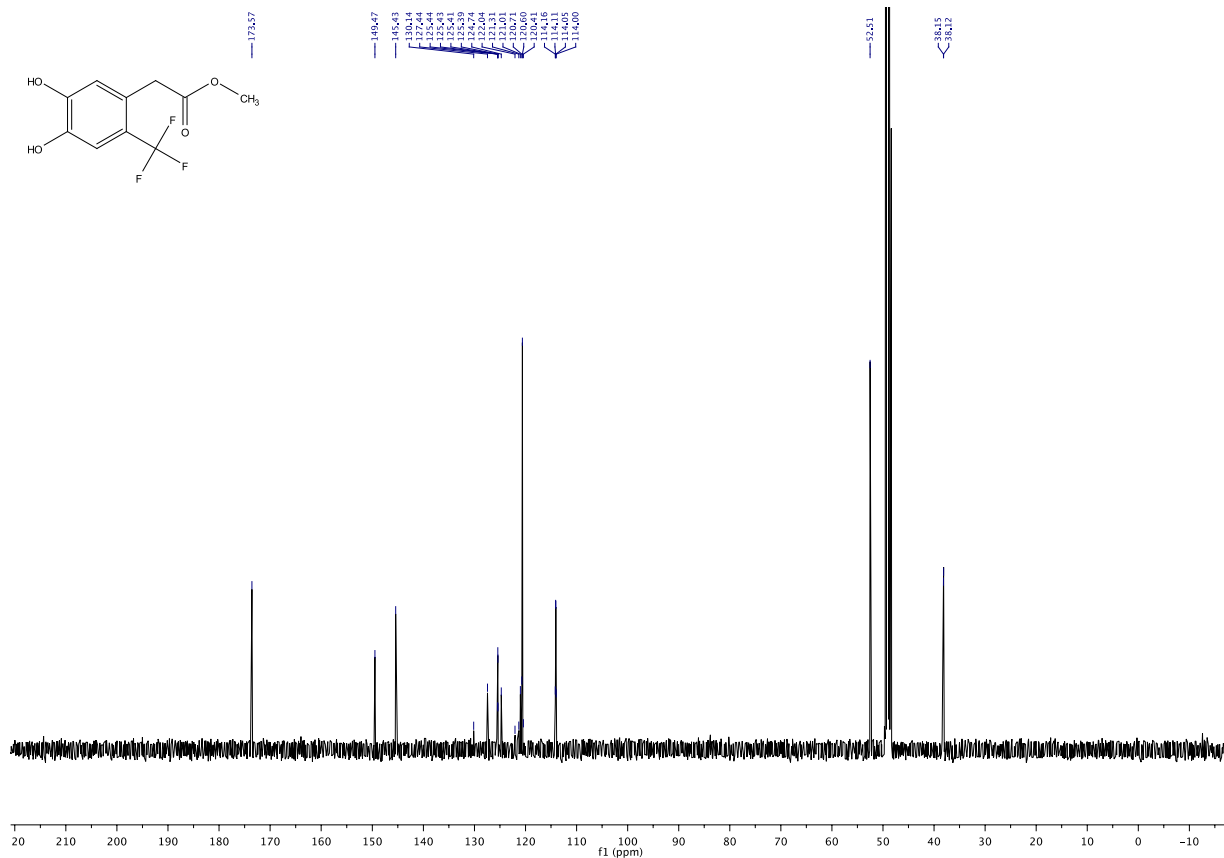

**Fig. S49.** <sup>13</sup>C NMR spectrum of **7** in CD<sub>3</sub>OD.

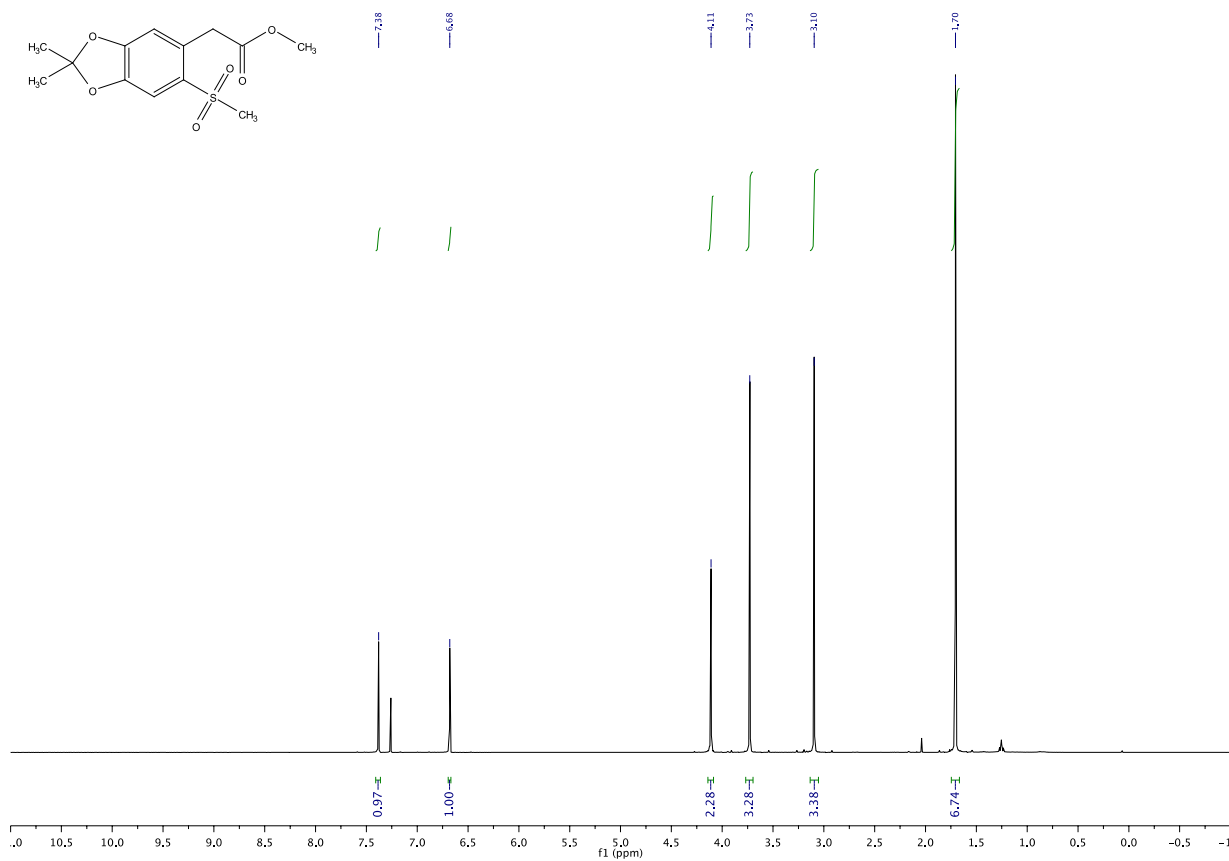

Fig. S50.  $^1\text{H}$  NMR spectrum of **35** in  $\text{CDCl}_3$ .

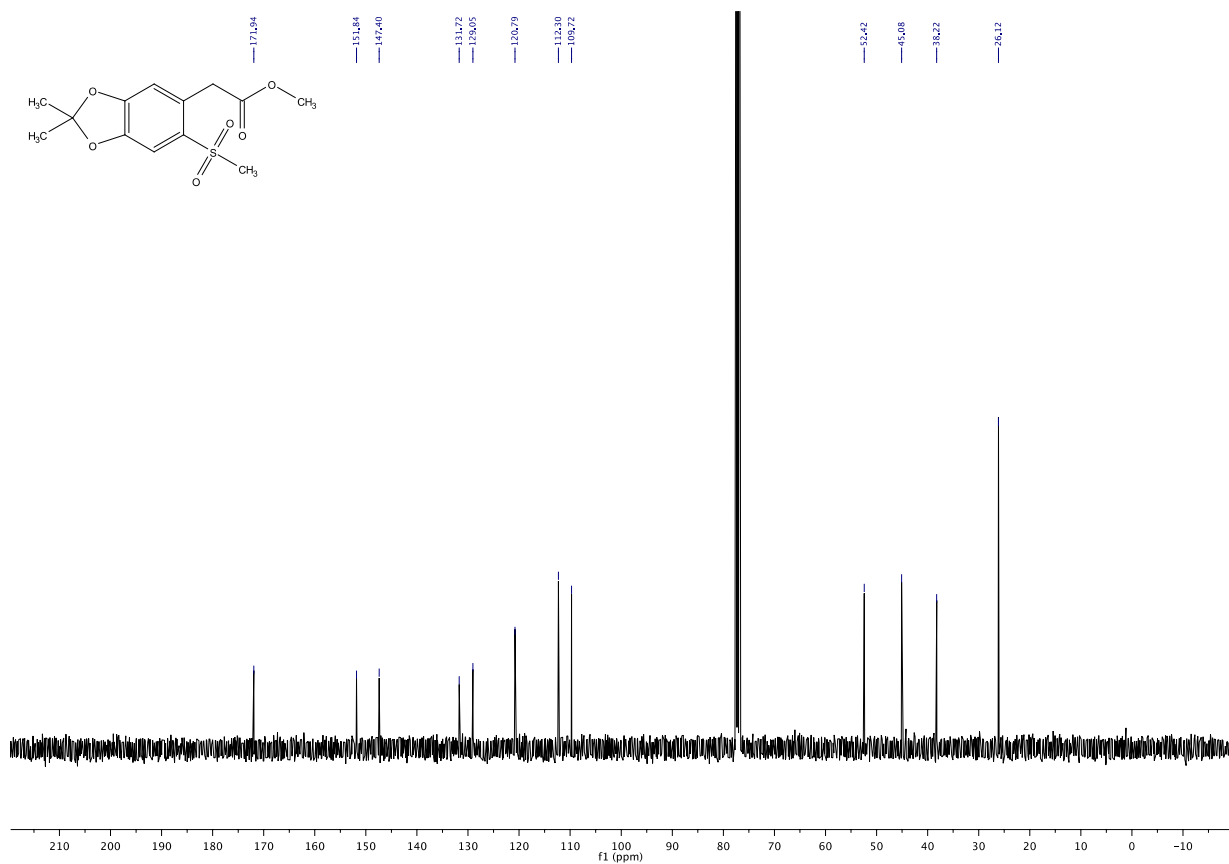

Fig. S51.  $^{13}\text{C}$  NMR spectrum of **35** in  $\text{CDCl}_3$ .

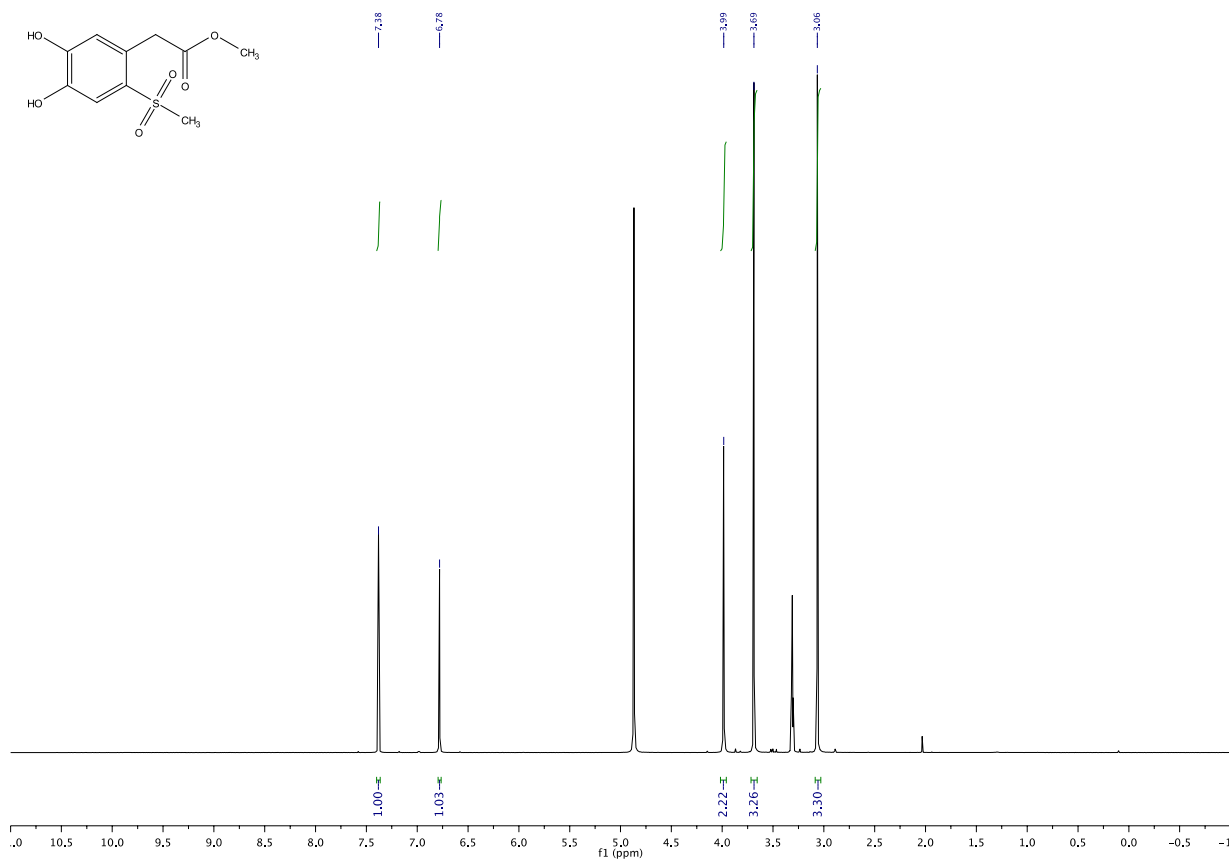

Fig. S52. <sup>1</sup>H NMR spectrum of **2** in CD<sub>3</sub>OD.

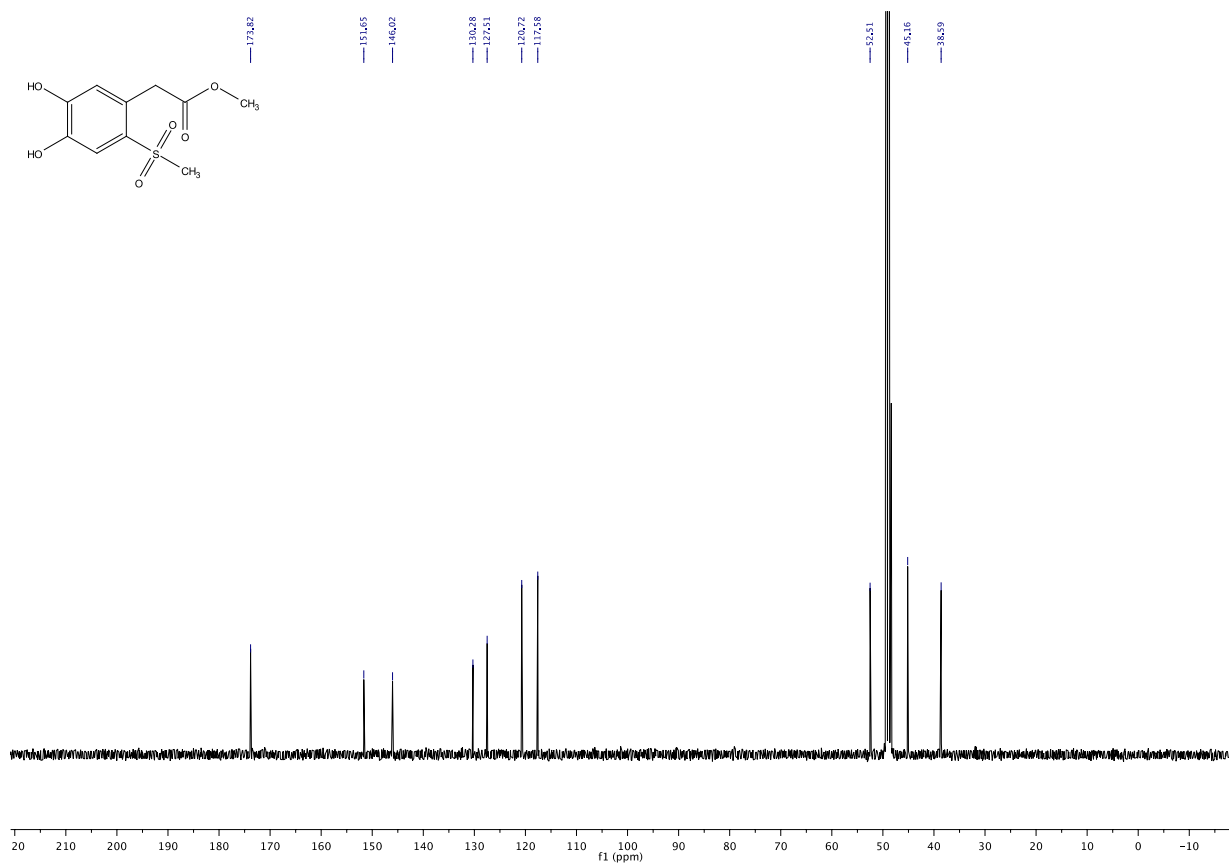

Fig. S53. <sup>13</sup>C NMR spectrum of **2** in CD<sub>3</sub>OD.
